# Supplementary material for: Protective association of HLA-DRB1*04 subtypes in neurodegenerative diseases implicates acetylated tau PHF6 sequences
Source: Research Square preprint supplement (doi:10.21203/rs.3.rs-1285855/v1), 2022-05-09
Supplement: Supplementary file 2 [file 5e14b81c79594ac6a3f42104.xlsx]

## Sheet: alleles
HLA	BETA_EUR_Yu2021	SE_EUR_Yu2021	P_EUR_Yu2021	Freq_EUR_Yu2021	N_EUR	BETA_23andMe_Chang2017	SE_23andMe_Chang2017	P_23andMe_Chang2017	N_Chang2017	BETA_23andMe_Nalls2014.v2	SE_23andMe_Nalls2014.v2	P_23andMe_Nalls2014.v2	N_Nalls2014.v2	BETA_23andMe_Nalls2014.v3	SE_23andMe_Nalls2014.v3	P_23andMe_Nalls2014.v3	N_Nalls2014.v3	BETA_23andMe_Nalls2018	SE_23andMe_Nalls2018	P_23andMe_Nalls2018	N_Nalls2018	BETA_SG_Foo2020	SE_SG_Foo2020	P_SG_Foo2020	Freq_SG_Foo2020	N_SG	BETA_TW_Foo2020	SE_TW_Foo2020	P_TW_Foo2020	Freq_TW_Foo2020	N_TW	BETA_CN_Foo2020	SE_CN_Foo2020	P_CN_Foo2020	Freq_CN_Foo2020	N_CN	BETA_HK_Foo2020	SE_HK_Foo2020	P_HK_Foo2020	Freq_HK_Foo2020	N_HK	BETA_Japan_Naito2021	SE_Japan_Naito2021	P_Japan_Naito2021	Freq_Japan_Naito2021	N_Japan	BETA_KR_Foo2020	SE_KR_Foo2020	P_KR_Foo2020
DQA1*03:01	-0.1559	0.0283	3.535e-08	0.18	524845	-0.0930414	0.0203023	4.58787e-06	308518	-0.116351	0.0302836	0.000122005	32760	-0.103577	0.0547393	0.0584653	33404	-0.083841	0.0313759	0.00753671	573859	-0.182356	0.0653913	0.00529211	0.15	21354	0.254461	0.301841	0.39921	0.12	470	-0.201957	0.106026	0.0568069	0.09	4527	-0.0264073	0.380788	0.944712	0.09	379	0.0509895	0.102665	0.619429	0.14	3509	-0.10737	0.127505	0.39974
DQB1*03:02	-0.1352	0.0273	7.62e-07	0.19	524845	-0.0605573	0.0219426	0.00578369	308518	-0.121202	0.0327231	0.000212331	32760	-0.171511	0.0591041	0.00370976	33404	-0.0582411	0.0339092	0.085877	573859	-0.165051	0.0711997	0.0204415	0.18	15320	0.279522	0.28539	0.327363	0.14	471	-0.223016	0.104441	0.0327343	0.1	4511	-0.171028	0.369239	0.643228	0.09	379	0.0803494	0.0978146	0.411392	0.15	3509	-0.072574	0.125126	0.561909
DRB1*04:04	-0.1712	0.0435	8.209e-05	0.07	524845	-0.151454	0.0455599	0.000886431	308518	-0.258695	0.067946	0.000140458	32760	-0.246541	0.122807	0.0446914	33404	-0.0875685	0.0704162	0.213652	573859					0	0.0381708	1.01314	0.969946	0.01	467					0	-1.35993	1.17742	0.248087	0.01	377					0
DRB1*04:01	-0.1185	0.0283	2.815e-05	0.2	524845	-0.0749788	0.0259443	0.00385253	308518	-0.0791359	0.0387071	0.0409062	32760	-0.0689886	0.0699609	0.324083	33404	-0.0635877	0.0400947	0.112753	573859					0					0	0.0640148	0.279691	0.818965	0.01	4441					0	0.139208	0.21442	0.516189	0.03	3509	0.148557	0.444094	0.73799
DQB1*03:03	0.0696	0.0363	0.05558	0.1	524845	0.0685124	0.0534404	0.199831	308518	0.292192	0.0796875	0.000245674	32760	0.599134	0.143739	3.06991e-05	33404	0.0964647	0.0825816	0.242761	573859	0.0319702	0.0552831	0.563061	0.35	15320	0.257242	0.227044	0.257211	0.24	471	0.0609895	0.0656259	0.352707	0.33	4511	0.113821	0.237714	0.632069	0.3	379	-0.00921055	0.0716169	0.897667	0.3	3509	-0.0662688	0.119097	0.577919
DQB1*05:01	0.0511	0.0258	0.04771	0.22	524845	0.0782247	0.0320492	0.0146562	308518	0.0819812	0.0478155	0.0864312	32760	0.132903	0.0864015	0.123999	33404	0.0393397	0.0495319	0.427061	573859	0.0647701	0.13119	0.62151	0.04	15320	0.333358	0.435818	0.44433	0.06	471	0.155753	0.114312	0.17303	0.08	4511	-0.241679	0.419613	0.564644	0.07	379	0.157727	0.110938	0.155096	0.12	3509	-0.0452357	0.130961	0.729784
DQA1*01:02	0.0101	0.0221	0.6482	0.37	524845	0.0914673	0.0295766	0.00198444	308518	0.000627864	0.0441352	0.98865	32760	0.0299285	0.0797676	0.707515	33404	0.107627	0.0457022	0.0185241	573859	0.0961036	0.0482056	0.0461939	0.32	21354	-0.127168	0.204628	0.534298	0.34	470	0.107505	0.0645155	0.0956436	0.36	4527	-0.508648	0.233417	0.0293213	0.33	379	0.09895	0.0821782	0.228555	0.22	3509	0.152974	0.102779	0.136652
DQA1*01:01	0.061	0.0264	0.0208	0.2	524845	0.0625836	0.0298672	0.0361356	308518	0.0771015	0.0445585	0.0835692	32760	0.0364837	0.0805421	0.650566	33404	0.0337195	0.0461583	0.465072	573859	0.00799327	0.112796	0.943505	0.04	21354	0.133316	0.473317	0.778202	0.05	470	0.0466748	0.117639	0.691543	0.07	4527	0.045083	0.407611	0.911931	0.08	379	0.194076	0.11946	0.104247	0.1	3509	0.111208	0.131865	0.399034
DRB1*07:01	0.0601	0.0245	0.01428	0.27	524845	0.0299511	0.0345055	0.38539	308518	0.145132	0.0514639	0.00480125	32760	0.147734	0.0930117	0.112209	33404	0.070866	0.0533194	0.18382	573859	-0.19618	0.114988	0.0879918	0.05	21557	1.33702	0.661777	0.0433472	0.03	467	0.0979391	0.103508	0.344046	0.1	4441	0.031392	0.401177	0.937629	0.08	377					0	-0.0542484	0.155574	0.727315
DQA1*02:01	0.0615	0.0241	0.01086	0.26	524845	0.0216769	0.0348678	0.534148	308518	0.144569	0.0520044	0.00543675	32760	0.153174	0.0939857	0.103152	33404	0.0808497	0.0538775	0.133454	573859	-0.177139	0.116981	0.129962	0.05	21354	1.33797	0.661811	0.04321	0.03	470	0.101322	0.103064	0.325558	0.1	4527	0.0299442	0.400945	0.940466	0.08	379					0	-0.0476249	0.154066	0.75723
DRB1*15:01	-0.005	0.0246	0.8394	0.27	524845	0.159923	0.0426538	0.000177308	308518	0.0543918	0.0636531	0.392825	32760	0.0681449	0.115043	0.553622	33404	0.174563	0.0659101	0.00808494	573859	0.093454	0.0554438	0.0918802	0.2	21557	0.169434	0.263421	0.520092	0.16	467	0.0639271	0.0761276	0.401056	0.21	4441	-0.322644	0.282789	0.253896	0.19	377	0.0473429	0.110974	0.669661	0.12	3509	0.251317	0.137818	0.0682218
DRB1*04:07	-0.1478	0.0805	0.06641	0.02	524845				0				0				0				0					0					0					0					0					0
DQB1*06:02	0.0032	0.0244	0.8944	0.26	524845	0.1799	0.0431526	3.06045e-05	308518	-0.0111353	0.0644035	0.86273	32760	0.0756666	0.116395	0.515637	33404	0.174268	0.0666858	0.00896809	573859	-0.067736	0.179798	0.706371	0.02	15320	0.0842195	0.399679	0.833107	0.06	471	0.132732	0.095224	0.16335	0.12	4511	-0.380144	0.49651	0.443895	0.06	379	0.0224696	0.114151	0.843952	0.11	3509	0.158314	0.138435	0.252792
DQA1*01:03	-0.0502	0.0326	0.1232	0.12	524845	-0.0386984	0.0459008	0.399179	308518	-0.116277	0.0684742	0.0894852	32760	0.179788	0.123736	0.146224	33404	-0.0606379	0.0709316	0.392619	573859	0.0242229	0.0623839	0.697804	0.15	21354	0.270035	0.266669	0.31124	0.15	470	-0.231732	0.0879884	0.00844702	0.14	4527	-0.157412	0.309949	0.611549	0.15	379	-0.109269	0.0662466	0.099059	0.36	3509	-0.147339	0.124884	0.238077
DRB1*01:01	0.0377	0.0284	0.1843	0.18	524845	0.0954012	0.0378967	0.0118225	308518	0.0126758	0.056547	0.82263	32760	0.0466341	0.102199	0.64817	33404	-0.0197303	0.0585711	0.736222	573859					0					0	0.322221	0.184261	0.080339	0.03	4441	1.1882	1.11909	0.288347	0.02	377	0.194076	0.11946	0.104247	0.1	3509	0.107604	0.151993	0.478973
DRB1*14:02					0				0				0				0				0					0					0					0					0					0
DQA1*03:03	-0.0958	0.0299	0.001343	0.16	524845				0				0				0				0	0.0323007	0.0684501	0.637007	0.12	21354	-0.217469	0.258561	0.400306	0.16	470	0.0158939	0.0988558	0.872268	0.11	4527	0.250239	0.360574	0.487681	0.11	379	0.00318596	0.0654702	0.961188	0.37	3509	-0.0577427	0.121731	0.635253
DRB1*04:03					0	-0.0044938	0.0941179	0.961918	308518	-0.0664488	0.140418	0.636055	32760	-0.162344	0.253776	0.522358	33404	-0.0105165	0.145446	0.942359	573859	-0.283302	0.0947984	0.0028038	0.07	21557	0.564373	0.435926	0.195439	0.06	467	-0.327617	0.155836	0.0355248	0.04	4441	0.261389	0.521758	0.616387	0.05	377	-0.0772439	0.178264	0.664788	0.05	3509	-0.107719	0.186445	0.56343
DQA1*05:03					0				0				0				0				0					0					0	0.28112	0.204091	0.16838	0.02	4527	-1.19252	0.844354	0.157849	0.02	379	-0.00465171	0.227655	0.983698	0.03	3509
DQB1*03:01	-0.02	0.0226	0.3755	0.35	524845	-0.0605157	0.0299465	0.0433012	308518	-0.0523188	0.0446797	0.241609	32760	0.0302315	0.0807564	0.708141	33404	-0.05543	0.0462785	0.231015	573859	-0.113121	0.0534259	0.0342306	0.46	15320	0.0199337	0.200504	0.920806	0.37	471	0.012735	0.0636558	0.841434	0.39	4511	-0.0253701	0.22113	0.908659	0.44	379	-0.00463077	0.0869303	0.957517	0.2	3509	0.066335	0.113741	0.559751
DQB1*06:03	-0.0468	0.034	0.1685	0.11	524845	-0.0996064	0.0534385	0.0623296	308518	-0.13193	0.0797238	0.0979572	32760	0.168178	0.144079	0.243104	33404	-0.0525923	0.0825857	0.524241	573859					0	0.62644	0.876278	0.474678	0.01	471	0.128078	0.226759	0.572196	0.02	4511	0.0656828	0.841596	0.937792	0.02	379					0	0.117071	0.206913	0.57153
DRB1*04:02	-0.0681	0.1	0.4957	0.02	524845	-0.0694865	0.0601498	0.247999	308518	-0.155049	0.0897316	0.0840021	32760	-0.179524	0.162171	0.268291	33404	-0.0660093	0.0929532	0.477621	573859					0					0					0					0					0
DQA1*05:01	0.0103	0.0248	0.6781	0.25	524845	0.0203179	0.020388	0.318978	308518	0.0570401	0.0304139	0.0607295	32760	-0.040193	0.0549735	0.464697	33404	0.00207107	0.0315074	0.947591	573859	0.17116	0.0586006	0.00349156	0.16	21354	-0.330826	0.230356	0.15096	0.22	470	0.174934	0.102196	0.0869438	0.1	4527	0.745164	0.335291	0.0262533	0.13	379					0	0.260523	0.244901	0.287424
DRB1*13:01	-0.0494	0.0344	0.1514	0.12	524845	-0.0924841	0.0535949	0.0844171	308518	-0.119033	0.0799582	0.136567	32760	0.211468	0.144483	0.143297	33404	-0.0256476	0.0828279	0.756828	573859					0	0.319645	0.924865	0.729634	0.01	467	0.0807905	0.239129	0.735474	0.02	4441	0.0655152	0.842057	0.937984	0.02	377					0	-0.00979791	0.248466	0.968545
DRB1*08:01	0.1316	0.0538	0.01444	0.04	524845	-0.0337223	0.0625359	0.589717	308518	0.0775131	0.0932983	0.406081	32760	0.305039	0.168549	0.0703278	33404	0.027312	0.0966407	0.777472	573859					0					0					0					0					0
DRB1*01:02	0.1346	0.078	0.08453	0.02	524845	-0.0480181	0.0941174	0.609916	308518	0.330389	0.140386	0.0186012	32760	-0.0914028	0.253787	0.71873	33404	0.255159	0.145423	0.0793277	573859					0					0					0					0					0
DRB1*01:03	0.1636	0.0855	0.05564	0.02	524845				0				0				0				0					0					0					0					0					0
DRB1*03:01	0.0067	0.0251	0.79	0.26	524845	0.0158488	0.0222228	0.475736	308518	0.0485523	0.0331527	0.143056	32760	-0.0444454	0.0599202	0.458243	33404	0.0111002	0.0343425	0.746529	573859	0.141943	0.0579932	0.0143819	0.16	21557	-0.348404	0.229996	0.129816	0.22	467	0.173433	0.101939	0.0888804	0.11	4441	0.795668	0.333135	0.0169208	0.14	377					0	0.233433	0.245953	0.342571
DRB1*08:03					0				0				0				0				0	0.0118402	0.0625535	0.849872	0.14	21557	0.266799	0.275341	0.332558	0.14	467	-0.248875	0.0925166	0.00714385	0.13	4441	-0.186972	0.329356	0.570246	0.13	377	-0.0517236	0.0914276	0.571575	0.18	3509	-0.197872	0.140854	0.160082
DRB1*11:01	0.0598	0.0342	0.07991	0.13	524845	0.0146494	0.0516061	0.77651	308518	0.158764	0.07698	0.039169	32760	0.0782812	0.139151	0.573733	33404	-0.00574628	0.0797502	0.942559	573859	-0.117518	0.0645871	0.0688303	0.14	21557	0.0472947	0.264557	0.858118	0.16	467	0.088352	0.0910515	0.331871	0.14	4441	-0.443667	0.336959	0.187946	0.12	377	-0.21407	0.181766	0.238906	0.04	3509	0.210062	0.175296	0.230791
DRB1*08:09					0				0				0				0				0	-0.310718	0.190404	0.102702	0.02	21557	0.00221018	0.717189	0.997541	0.02	467	-0.305707	0.307384	0.319958	0.01	4441					0					0	0.357384	0.512631	0.485705
DQA1*04:01	0.1306	0.0521	0.0122	0.04	524845	0.000644745	0.0543997	0.990544	308518	0.0130408	0.0811615	0.872348	32760	0.202011	0.146649	0.168354	33404	0.0118869	0.084067	0.887555	573859	-0.102546	0.158568	0.517828	0.02	21354	-0.00219169	0.643726	0.997283	0.02	470	-0.343661	0.263823	0.192704	0.01	4527	0.778574	1.1716	0.506345	0.01	379	0.176354	0.164678	0.284214	0.05	3509	0.411908	0.308008	0.181116
DQB1*06:01	-0.0281	0.0966	0.7715	0.01	524845	0.119909	0.0805168	0.136425	308518	-0.0471545	0.120132	0.694672	32760	0.0926075	0.217119	0.669723	33404	-0.200239	0.124416	0.107523	573859	0.0390729	0.0631463	0.53607	0.22	15320	0.312678	0.235525	0.184318	0.21	471	-0.197839	0.0759085	0.00915321	0.21	4511	-0.228771	0.25761	0.374513	0.24	379	-0.107598	0.0665197	0.105763	0.36	3509	-0.0975619	0.124938	0.434872
DQB1*02:01	0.0099	0.0248	0.6895	0.25	524845	0.0103322	0.0218432	0.636202	308518	0.049964	0.0325858	0.125201	32760	-0.0495521	0.0588948	0.400144	33404	-0.00341194	0.0337557	0.919489	573859	0.144856	0.0632992	0.0221126	0.2	15320	-0.324975	0.230316	0.158246	0.22	471	0.164872	0.102203	0.106706	0.1	4511	0.745164	0.335291	0.0262533	0.13	379					0	0.208949	0.246165	0.395983
DRB1*14:03					0				0				0				0				0					0					0					0					0	0.377728	0.253034	0.135491	0.02	3509
DRB1*14:54					0				0				0				0				0	-0.0174806	0.091456	0.848418	0.07	21557	0.146026	0.313097	0.640935	0.11	467	-0.204342	0.110053	0.0633461	0.09	4441	0.154141	0.395038	0.696393	0.08	377	-0.0390389	0.157244	0.803925	0.06	3509	-0.249995	0.193725	0.196889
DQB1*04:02	0.1187	0.0513	0.02071	0.04	524845	-0.00390519	0.0528324	0.941077	308518	0.056184	0.0788217	0.47597	32760	0.223982	0.142412	0.115772	33404	0.0137632	0.0816451	0.866132	573859	-0.0638412	0.206937	0.757697	0.02	15320	0.00266474	0.643772	0.996697	0.02	471	-0.377331	0.266478	0.156778	0.01	4511	0.778574	1.1716	0.506345	0.01	379	0.0412876	0.116731	0.723564	0.11	3509	0.252282	0.337671	0.454988
DQB1*02:02	0.0474	0.0266	0.0751	0.2	524845	-0.011516	0.0382933	0.76362	308518	0.0629766	0.0571289	0.270305	32760	-0.0690505	0.103252	0.503651	33404	0.0274381	0.0591764	0.642887	573859	-0.241554	0.139823	0.0840639	0.05	15320	1.33914	0.661819	0.0430299	0.03	471	0.0291798	0.10941	0.789699	0.09	4511	-0.0211229	0.406016	0.958509	0.08	379					0	0.0118441	0.164313	0.942536
DQA1*03:02	0.1079	0.0704	0.1254	0.02	524845				0				0				0				0	0.0240311	0.0485535	0.620642	0.32	21354	0.252886	0.227047	0.265364	0.24	470	0.0377183	0.0661132	0.568332	0.32	4527	0.0624917	0.237323	0.792305	0.3	379	-0.0147967	0.0717734	0.836668	0.3	3509	-0.116769	0.120294	0.331702
DRB1*12:02					0				0				0				0				0	-0.0447764	0.0531197	0.399266	0.25	21557	-0.106821	0.261983	0.683464	0.17	467	-0.0843761	0.0782057	0.280633	0.2	4441	0.11352	0.255696	0.657067	0.25	377	-0.1213	0.203305	0.55075	0.03	3509	-0.0107575	0.191775	0.955267
DQA1*05:08					0				0				0				0				0	-0.311041	0.193463	0.107889	0.02	21354	0.343101	0.77329	0.657266	0.02	470	0.0123744	0.236557	0.958281	0.02	4527	-1.60136	1.22279	0.190331	0.01	379					0	-0.0924754	0.275103	0.736759
DQA1*06:01					0				0				0				0				0	-0.0523144	0.0560046	0.350247	0.23	21354	-0.0344704	0.275025	0.900258	0.15	470	-0.0816356	0.0796863	0.305617	0.19	4527	0.14791	0.254635	0.561327	0.25	379	-0.0951566	0.19835	0.631411	0.04	3509	0.0144043	0.186838	0.938548
DQB1*05:02	0.0622	0.0619	0.3146	0.05	524845	-0.0278941	0.0575327	0.627791	308518	0.00443804	0.0858363	0.958765	32760	-0.0934078	0.155131	0.547092	33404	0.110752	0.0889021	0.212847	573859	0.160974	0.0775654	0.0379558	0.13	15320	-0.368592	0.236128	0.118528	0.22	471	0.0819512	0.0822233	0.318914	0.18	4511	-0.197629	0.262412	0.451374	0.22	379	-0.170593	0.185507	0.35778	0.04	3509	-0.0355804	0.19859	0.857808
DQA1*01:04	-0.0001	0.0489	0.9982	0.05	524845				0				0				0				0	-0.021532	0.0774551	0.781018	0.1	21354	-0.126012	0.26339	0.632348	0.16	470	-0.107212	0.0904905	0.236102	0.14	4527	0.380519	0.310956	0.221063	0.15	379	-0.0713261	0.120492	0.55388	0.1	3509	-0.345092	0.141083	0.0144443
DQB1*06:04	-0.0478	0.0431	0.2681	0.06	524845	-0.00915595	0.0580283	0.874627	308518	-0.0815409	0.0865721	0.346252	32760	-0.0823057	0.156468	0.598874	33404	-0.0638801	0.0896723	0.476234	573859					0					0					0					0	0.175127	0.124648	0.160028	0.09	3509	0.113034	0.216364	0.601375
DRB1*13:12					0				0				0				0				0					0					0	0.259733	0.195698	0.184439	0.03	4441	-1.18591	0.844584	0.160279	0.02	377					0
DQB1*06:09	0.0138	0.0733	0.8503	0.02	524845				0				0				0				0	0.0420256	0.111779	0.706939	0.05	15320	0.0464866	0.441587	0.91616	0.05	471	0.259086	0.156901	0.0986827	0.04	4511	-0.814301	0.735545	0.268263	0.02	379					0	0.0677454	0.177791	0.703174
DRB1*13:03	-0.0869	0.0796	0.2747	0.02	524845				0				0				0				0					0					0					0					0					0
DRB1*16:01	0.1084	0.0682	0.1117	0.04	524845	0.0303953	0.0816465	0.709685	308518	-0.135538	0.121806	0.265823	32760	-0.289422	0.220106	0.188537	33404	0.0957092	0.12617	0.448107	573859					0					0					0					0					0
DQA1*05:05	0.0407	0.0264	0.1226	0.23	524845				0				0				0				0	-0.137963	0.0591914	0.019764	0.19	21354	0.0425219	0.23368	0.855609	0.21	470	0.0537734	0.0821485	0.512733	0.17	4527	0.0205476	0.295826	0.944625	0.17	379	-0.164402	0.140746	0.242775	0.07	3509	0.243173	0.147785	0.0998775
DRB1*11:04	0.0377	0.0661	0.5683	0.04	524845	0.135849	0.083426	0.103445	308518	0.037262	0.124473	0.764668	32760	-0.135804	0.22496	0.546055	33404	-0.17333	0.128918	0.178787	573859					0					0					0					0					0
DRB1*09:01	0.0918	0.0725	0.2053	0.02	524845	-0.0588159	0.0661245	0.373749	308518	0.147881	0.0986465	0.133848	32760	0.135501	0.178294	0.447263	33404	-0.0908796	0.102184	0.373801	573859	0.0132868	0.0479062	0.781512	0.32	21557	0.259173	0.227344	0.254285	0.24	467	0.0399587	0.0665174	0.548022	0.32	4441	-0.00547559	0.238371	0.981673	0.3	377	-0.0258142	0.0742113	0.727955	0.28	3509	-0.149013	0.12541	0.234751
DRB1*14:04					0				0				0				0				0					0					0					0	0.677513	0.878915	0.440795	0.02	377					0
DRB1*04:06					0				0				0				0				0	-0.112857	0.109247	0.301581	0.04	21557	-0.127275	0.444535	0.774641	0.05	467	-0.16636	0.160293	0.29934	0.04	4441	-0.0629809	0.624126	0.919621	0.03	377	0.265845	0.176507	0.13203	0.05	3509	-0.0688827	0.186104	0.711286
DRB1*16:02					0				0				0				0				0	-0.0505121	0.0917851	0.582093	0.07	21557	-0.78634	0.32429	0.0153164	0.12	467	0.0973631	0.112418	0.386447	0.09	4441	-0.40662	0.330111	0.218036	0.12	377					0	0.568308	0.37537	0.130026
DRB1*04:10					0				0				0				0				0					0					0					0					0	0.00759897	0.170341	0.964418	0.05	3509
DQB1*04:01					0				0				0				0				0	-0.0142149	0.0786478	0.856571	0.13	15320	-0.236495	0.271338	0.383434	0.14	471	0.00707903	0.105872	0.94669	0.1	4511	0.266122	0.385747	0.490266	0.09	379	-0.00697782	0.0735031	0.924369	0.29	3509	-0.11102	0.12703	0.382138
DRB1*14:01	0.0134	0.0494	0.7863	0.05	524845				0				0				0				0					0					0					0					0					0
DRB1*14:05					0				0				0				0				0	0.132176	0.148942	0.374846	0.02	21557	-0.618263	0.450849	0.170272	0.05	467	0.0837518	0.157883	0.595788	0.04	4441	0.810701	0.558294	0.146472	0.05	377	-0.0931424	0.180004	0.604845	0.04	3509	-0.438308	0.199894	0.0283286
DRB1*13:02	-0.0339	0.0382	0.375	0.09	524845	0.0265211	0.0528322	0.615676	308518	-0.0255629	0.0788231	0.745705	32760	0.0749989	0.142458	0.598567	33404	0.00406129	0.0816452	0.960327	573859	0.0392156	0.103784	0.705536	0.04	21557	0.224412	0.424639	0.597168	0.05	467	0.0896046	0.13313	0.500908	0.06	4441	-1.04386	0.717613	0.145773	0.03	377	0.188462	0.118045	0.110371	0.1	3509	0.0947024	0.13096	0.469594
DRB1*08:02					0				0				0				0				0					0					0					0					0	0.110708	0.129361	0.392106	0.09	3509	0.532099	0.357842	0.137024
DQB1*05:03	0.0059	0.0487	0.9039	0.05	524845	-0.0324442	0.070993	0.647667	308518	0.151988	0.105909	0.151264	32760	-0.438838	0.191286	0.0217823	33404	0.0744421	0.109708	0.497423	573859					0	-0.202273	0.312835	0.517902	0.11	471	-0.139224	0.110512	0.207739	0.09	4511	0.484241	0.362126	0.181152	0.11	379	-0.0106806	0.139186	0.938833	0.07	3509	-0.331624	0.168964	0.049682
DQA1*01:05	-0.0863	0.0974	0.3754	0.01	524845				0				0				0				0	0.219654	0.125317	0.0796389	0.03	21354	1.02342	0.603412	0.089875	0.04	470	0.00210134	0.188802	0.99112	0.03	4527	-0.398839	0.62728	0.524892	0.03	379					0	-0.452142	0.253579	0.0745792
DRB1*04:05	0.0888	0.1065	0.4044	0.01	524845	-0.0113476	0.0519575	0.827116	308518	-0.0436626	0.077517	0.573255	32760	-0.0141908	0.140105	0.919322	33404	-0.0380609	0.0802922	0.635479	573859	0.0294166	0.0664593	0.658036	0.12	21557	-0.218893	0.261735	0.402977	0.16	467	-0.0174744	0.104229	0.866856	0.1	4441	0.335783	0.367793	0.36126	0.1	377	-0.0160286	0.0706395	0.820496	0.31	3509	-0.0168074	0.127628	0.895229
DRB1*14:06					0				0				0				0				0					0					0					0					0	0.0378189	0.248243	0.878914	0.02	3509
DRB1*12:01	0.0355	0.0619	0.5659	0.03	524845				0				0				0				0	-0.0292695	0.0855716	0.732315	0.07	21557	0.202277	0.359719	0.573898	0.07	467	-0.098483	0.140811	0.484303	0.05	4441	1.0169	0.499976	0.0419612	0.07	377	-0.0288962	0.150767	0.848007	0.06	3509	-0.105385	0.167255	0.528639
DRB1*15:02	-0.0149	0.0983	0.8798	0.01	524845	0.0195552	0.0695411	0.778554	308518	0.0294169	0.103752	0.776769	32760	0.109049	0.18751	0.560861	33404	-0.102483	0.107461	0.34025	573859	0.196359	0.100475	0.0506657	0.05	21557	0.151611	0.497835	0.760715	0.04	467	-0.111257	0.148026	0.452289	0.05	4441	-0.468669	0.418335	0.262578	0.07	377	-0.133198	0.0857836	0.120491	0.2	3509	0.108598	0.210087	0.605213
DQB1*06:10					0				0				0				0				0					0					0					0	0.142207	1.0939	0.896566	0.01	379					0
DRB1*11:02					0				0				0				0				0					0					0					0					0					0
DRB1*10:01	-0.0835	0.0971	0.3903	0.01	524845				0				0				0				0	0.1949	0.122341	0.111142	0.03	21557	1.02382	0.603416	0.0897528	0.04	467	0.0240075	0.188135	0.898459	0.03	4441	-0.39639	0.627489	0.527577	0.03	377					0	-0.458366	0.253804	0.0709211
[truncated: 22 more columns]

## Sheet: haplotypes
HLA	BETA_EUR_Yu2021	SE_EUR_Yu2021	P_EUR_Yu2021	Freq_EUR_Yu2021	N_EUR	BETA_23andMe_Chang2017	SE_23andMe_Chang2017	P_23andMe_Chang2017	N_Chang2017	BETA_23andMe_Nalls2014.v2	SE_23andMe_Nalls2014.v2	P_23andMe_Nalls2014.v2	N_Nalls2014.v2	BETA_23andMe_Nalls2014.v3	SE_23andMe_Nalls2014.v3	P_23andMe_Nalls2014.v3	N_Nalls2014.v3	BETA_23andMe_Nalls2018	SE_23andMe_Nalls2018	P_23andMe_Nalls2018	N_Nalls2018	BETA_SG_Foo2020	SE_SG_Foo2020	P_SG_Foo2020	Freq_SG_Foo2020	N_SG	BETA_TW_Foo2020	SE_TW_Foo2020	P_TW_Foo2020	Freq_TW_Foo2020	N_TW	BETA_CN_Foo2020	SE_CN_Foo2020	P_CN_Foo2020	Freq_CN_Foo2020	N_CN	BETA_HK_Foo2020	SE_HK_Foo2020	P_HK_Foo2020	Freq_HK_Foo2020	N_HK	BETA_Japan_Naito2021	SE_Japan_Naito2021	P_Japan_Naito2021	Freq_Japan_Naito2021	N_Japan	BETA_KR_Foo2020	SE_KR_Foo2020	P_KR_Foo2020
DQA1*03:01~DQB1*03:02~DRB1*04:04	-0.1542	0.0476	0.001183	0.08	524845	-0.15177	0.045988	0.000966	308518	-0.27191	0.068581	7.34e-05	32760	-0.25027	0.12396	0.043493	33404	-0.09126	0.071077	0.199182	573859					0	0.031057	1.01377	0.975561	0.01	471					0	-1.55695	1.13891	0.171609	0.01	379					0
DQA1*02:01~DQB1*03:03~DRB1*07:01	0.0848	0.0448	0.05842	0.08	524845	0.156857	0.080804	0.052232	308518	0.464806	0.120488	0.000114	32760	1.11594	0.217057	2.73e-07	33404	0.310423	0.124841	0.012899	573859					0					0	0.398767	0.272598	0.143511	0.01	4541					0					3509	0.078851	0.47875	0.869178
DQA1*03:01~DQB1*03:02~DRB1*04:07		0				0				0				0				0					0					0					0					0					0					0	-0.54596
DQA1*03:03~DQB1*03:01~DRB1*04:01	-0.0714	0.0391	0.06817	0.12	524845	-0.03962	0.011551		308518	-0.05562	0.035446		32760	0.025425	0.035104		33404	-0.0119	0.008469		573859					0					0	0.062366	0.279738	0.82358	0.01	4541					0					0	0.157027	0.443866	0.723511
DQA1*03:01~DQB1*03:02~DRB1*04:03		0				0				0				0				0	-0.24839	0.080231	0.001962	0.09	24376	0.640151	0.431091	0.137556	0.06	471	-0.32405	0.148122	0.028689	0.05	4541	0.257125	0.521126	0.621728	0.05	379	-0.06989	0.185703	0.706636	0.04	3509	-0.10546	0.174519	0.54564	0.08	2093
DQA1*01:02~DQB1*05:02~DRB1*15:01		0				0				0				0				0	0.225065	0.074755	0.002607	0.08	24376	0.175686	0.624187	0.778354	0.02	471	0.229414	0.220343	0.297797	0.02	4541	-0.43624	0.628977	0.487951	0.03	379					0					0
DQA1*03:01~DQB1*03:02~DRB1*04:01	-0.1107	0.0444	0.01266	0.09	524845	-0.02762	0.027911	0.322432	308518	-0.05281	0.04164	0.204679	32760	-0.10311	0.075243	0.170571	33404	-0.03938	0.043132	0.36129	573859					0					0					0					0					0
DQA1*01:03~DQB1*06:03~DRB1*13:01	-0.077	0.0382	0.04385	0.12	524845	-0.10546	0.054978	0.055087	308518	-0.14632	0.082019	0.074432	32760	0.193973	0.148222	0.190649	33404	-0.04356	0.084966	0.608161	573859					0	0.306449	0.924774	0.740359	0.01	471	-0.00516	0.246848	0.983337	0.02	4541	0.065683	0.841596	0.937792	0.02	379					0	0.061626	0.256225	0.809931
DQA1*01:02~DQB1*06:02~DRB1*15:01	-0.0091	0.0262	0.7276	0.29	524845	0.193955	0.046272	2.77e-05	308518	0.01296	0.06906	0.851137	32760	0.101289	0.124805	0.417035	33404	0.204504	0.071502	0.004235	573859	-0.09569	0.103853	0.356835	0.04	24376	0.161977	0.407693	0.691145	0.06	471	0.088605	0.098371	0.367735	0.11	4541	-0.26207	0.584917	0.65412	0.04	379	0.022488	0.114244	0.843952	0.11	3509	0.184581	0.13842	0.182372
DQA1*05:03~DQB1*03:01~DRB1*14:02		0				0				0				0				0					0					0					0					0					0					0	0.499978
DQA1*05:01~DQB1*02:01~DRB1*03:01	0.0458	0.0267	0.08599	0.28	524845	0.014795	0.022234	0.505786	308518	0.050518	0.033169	0.127754	32760	-0.04482	0.059951	0.454645	33404	0.008936	0.03436	0.794806	573859	0.148799	0.057198	0.009282	0.14	24376	-0.32498	0.230316	0.158246	0.22	471	0.168183	0.102118	0.099568	0.1	4541	0.745164	0.335291	0.026253	0.13	379					0	0.190411	0.246824	0.440445
DQA1*01:01~DQB1*05:01~DRB1*01:01	0.0159	0.0345	0.6451	0.15	524845	0.091576	0.038209	0.016542	308518	0.01708	0.057012	0.764495	32760	0.039805	0.103041	0.699275	33404	-0.01653	0.059053	0.779504	573859					0					0	0.313151	0.182716	0.086554	0.03	4541	1.18484	1.11849	0.289455	0.02	379	0.194251	0.119568	0.104247	0.1	3509	0.116516	0.150311	0.438242
DQA1*03:01~DQB1*03:02~DRB1*04:02	-0.0349	0.1104	0.7521	0.02	524845	-0.06948	0.060145	0.247999	308518	-0.15504	0.089725	0.084002	32760	-0.17951	0.162158	0.268291	33404	-0.066	0.092946	0.477621	573859					0					0					0					0					3509
DQA1*01:01~DQB1*03:01~DRB1*15:02		0				0				0				0				0	0.335294	0.163563	0.04037	0.01	24376					0					0					0					0					0
DQA1*01:04~DQB1*05:03~DRB1*14:01	0.0768	0.0549	0.1616	0.05	524845				0				0				0				0					0					0					0					0					0
DQA1*05:05~DQB1*03:01~DRB1*11:01	0.0861	0.0378	0.02256	0.13	524845	0.015062	0.053916	0.779969	308518	0.1294	0.080431	0.107653	32760	0.114995	0.145372	0.428921	33404	-0.01719	0.083319	0.836539	573859	-0.12436	0.061726	0.043932	0.14	24376	0.045798	0.264413	0.862491	0.16	471	0.096821	0.091395	0.289433	0.13	4541	-0.44246	0.336681	0.188785	0.12	379	-0.19176	0.196185	0.328345	0.04	3509	0.209281	0.176503	0.23574
DQA1*05:08~DQB1*03:01~DRB1*12:01		0				0				0				0				0	-0.25705	0.168507	0.127144	0.02	24376	0.347836	0.773355	0.652872	0.02	471	-0.11789	0.247701	0.63411	0.02	4541	-1.60136	1.22279	0.190331	0.01	379					0	-0.13134	0.276823	0.635187	0.03	2093
DQA1*01:03~DQB1*06:01~DRB1*08:03		0				0				0				0				0	0.008119	0.061795	0.895476	0.13	24376	0.265784	0.275185	0.334126	0.14	471	-0.2314	0.092513	0.012376	0.13	4541	-0.18769	0.329194	0.568573	0.13	379	-0.05803	0.092501	0.530448	0.17	3509	-0.16489	0.140409	0.240252	0.13	2093
DQA1*03:03~DQB1*03:01~DRB1*04:07	-0.1374	0.0879	0.1178	0.02	524845				0				0				0				0					0					0					0					0					0
DQA1*01:01~DQB1*05:01~DRB1*10:01		0				0				0				0				0					0					0					0					0					0					0	0.751871
DQA1*01:04~DQB1*03:01~DRB1*11:01		0				0				0				0				0	-0.30416	0.235083	0.195727	0.01	24376					0					0					0					0					0
DQA1*01:01~DQB1*05:01~DRB1*01:02	0.0364	0.1027	0.7229	0.02	524845	-0.04801	0.094107	0.609916	308518	0.330354	0.140371	0.018601	32760	-0.09139	0.25376	0.71873	33404	0.255132	0.145408	0.079328	573859					0					0					0					0					3509
DQA1*06:01~DQB1*03:01~DRB1*12:02		0				0				0				0				0	-0.04701	0.052278	0.368499	0.23	24376	-0.02988	0.275062	0.913493	0.15	471	-0.07196	0.079667	0.366395	0.19	4541	0.109314	0.255346	0.668578	0.25	379	-0.1214	0.203477	0.55075	0.03	3509	-0.01416	0.185346	0.939108	0.07	2093
DQA1*01:04~DQB1*05:03~DRB1*14:05		0				0				0				0				0					0	-0.68461	0.445795	0.124612	0.06	471	0.078563	0.157006	0.616808	0.04	4541	0.640393	0.526218	0.223614	0.05	379	-0.10509	0.181921	0.563478	0.04	3509	-0.42489	0.196919	0.03095	0.06	2093
DQA1*04:01~DQB1*04:02~DRB1*08:09		0				0				0				0				0	-0.22345	0.17754	0.208171	0.02	24376	0.000741	0.717239	0.999175	0.02	471	-0.16287	0.290209	0.574648	0.01	4541					0					0	0.130348	0.446696	0.770436	0.01	2093
DQA1*01:02~DQB1*06:02~DRB1*15:02		0				0				0				0				0					0					0					0	-1.3368	1.16473	0.25108	0.01	379					0					0
DQA1*04:01~DQB1*04:02~DRB1*08:01	0.0699	0.0654	0.2854	0.04	524845	-0.03108	0.064121	0.627864	308518	0.044976	0.095666	0.638259	32760	0.330338	0.172812	0.055935	33404	0.022063	0.099091	0.823808	573859					0					0					0					0					3509
DQA1*01:04~DQB1*05:03~DRB1*14:54		0				0				0				0				0					0	0.428499	0.448744	0.339636	0.05	471	-0.42694	0.165271	0.009787	0.04	4541	0.130475	0.560376	0.815889	0.04	379	0.142765	0.214622	0.505925	0.03	3509	-0.00339	0.294981	0.990833	0.03	2093
DQA1*01:04~DQB1*03:01~DRB1*14:05		0				0				0				0				0	0.16588	0.147195	0.259768	0.02	24376					0					0					0					0					0
DQA1*04:01~DQB1*04:02~DRB1*08:02		0				0				0				0				0					0					0					0					0	0.168415	0.198545	0.396302	0.04	3509					0	-0.28712
DQA1*01:01~DQB1*06:01~DRB1*15:02		0				0				0				0				0					0					0	-0.5264	0.264661	0.046705	0.01	4541					0					0	0.077974	0.24008	0.745344	0.04	2093
DQA1*01:02~DQB1*06:09~DRB1*13:02	0.0195	0.0812	0.8102	0.02	524845				0				0				0				0	0.0746	0.102839	0.468207	0.04	24376	0.046487	0.441587	0.91616	0.05	471	0.222694	0.154817	0.150311	0.04	4541	-0.8143	0.735545	0.268263	0.02	379					0	0.010825	0.172395	0.949933
DQA1*01:02~DQB1*06:04~DRB1*13:02	-0.0297	0.048	0.5362	0.07	524845	-0.00769	0.058539	0.895498	308518	-0.09287	0.087333	0.2876	32760	-0.07828	0.157846	0.619964	33404	-0.07032	0.090461	0.436974	573859					0					0	-0.63028	0.301638	0.03666	0.01	4541					0	0.175266	0.124747	0.160028	0.09	3509	0.064103	0.19328	0.740148
DQA1*01:04~DQB1*05:02~DRB1*14:54		0				0				0				0				0	0.005451	0.137623	0.968407	0.03	24376	-0.12599	0.418101	0.763159	0.06	471	-0.0035	0.13647	0.979521	0.05	4541	0.148377	0.538412	0.782868	0.04	379	-0.23359	0.23152	0.312997	0.03	3509	-0.35205	0.231557	0.128424	0.04	2093
DQA1*01:03~DQB1*06:01~DRB1*15:02	0.0536	0.1069	0.6164	0.02	524845				0				0				0				0					0					0					0					0	-0.13309	0.085714	0.120491	0.2	3509
DQA1*03:02~DQB1*03:03~DRB1*09:01	0.0703	0.0823	0.3932	0.02	524845	-0.02188	0.07255	0.762937	308518	0.148545	0.108233	0.169919	32760	0.154767	0.195615	0.428838	33404	-0.09396	0.112112	0.401963	573859	0.001233	0.046421	0.978806	0.29	24376	0.257242	0.227044	0.257211	0.24	471	0.03998	0.066236	0.546111	0.31	4541	0.024048	0.238808	0.919788	0.29	379	-0.02502	0.074536	0.737071	0.28	3509	-0.11196	0.124575	0.368807
DQA1*01:04~DQB1*05:03~DRB1*14:04		0				0				0				0				0					0					0					0	0.674736	0.878803	0.442612	0.02	379					0					0
DQA1*05:05~DQB1*03:01~DRB1*13:03	-0.0834	0.09	0.3541	0.02	524845				0				0				0				0					0					0					0					0					0
DQA1*03:01~DQB1*03:02~DRB1*04:06		0				0				0				0				0	-0.12382	0.101775	0.223747	0.05	24376	-0.0255	0.433978	0.953136	0.05	471	-0.11843	0.157545	0.452216	0.04	4541	-0.06316	0.623857	0.919357	0.03	379	0.272425	0.178349	0.126642	0.05	3509	-0.07841	0.180528	0.664049	0.08	2093
DQA1*01:04~DQB1*03:01~DRB1*14:54		0				0				0				0				0	-0.07951	0.109493	0.467731	0.04	24376					0					0					0					0					0
DQA1*05:03~DQB1*03:01~DRB1*13:12		0				0				0				0				0					0					0	0.221736	0.206028	0.281819	0.02	4541	-1.19252	0.844354	0.157849	0.02	379					0					0
DQA1*05:05~DQB1*03:01~DRB1*16:02		0				0				0				0				0					0					0					0					0					0					0	-0.1555
DQA1*05:05~DQB1*03:01~DRB1*11:04	0.0337	0.0737	0.6473	0.04	524845				0				0				0				0					0					0					0					0					0
DQA1*03:03~DQB1*04:02~DRB1*04:10		0				0				0				0				0					0					0					0					0	0.016913	0.173512	0.922351	0.05	3509					0	-0.69563
DQA1*05:05~DQB1*03:01~DRB1*12:01	0.0236	0.0684	0.7304	0.03	524845				0				0				0				0	0.028709	0.094862	0.762168	0.05	24376	0.153034	0.399924	0.701973	0.06	471	-0.09361	0.175832	0.594462	0.03	4541	1.25761	0.660991	0.05709	0.04	379					0	0.013461	0.233773	0.954081
DQA1*01:05~DQB1*05:01~DRB1*10:01		0				0				0				0				0	0.206546	0.121349	0.08874	0.03	24376	1.026	0.60344	0.089082	0.04	471	-0.01279	0.189481	0.946172	0.03	4541	-0.39884	0.62728	0.524892	0.03	379					0	-0.45029	0.253524	0.075714	0.03	2093	-0.4972
DQA1*03:01~DQB1*03:02~DRB1*08:02		0				0				0				0				0					0					0					0					0	0.009427	0.208805	0.963989	0.03	3509	0.531601	0.461537	0.249401	0.01	2093
DQA1*01:02~DQB1*06:01~DRB1*15:01		0				0				0				0				0	0.074987	0.079504	0.345588	0.08	24376	0.363552	0.384068	0.343851	0.07	471	-0.06422	0.117845	0.585764	0.07	4541	-0.21874	0.356892	0.539948	0.11	379					0					0
DQA1*01:02~DQB1*05:02~DRB1*16:01	0.0842	0.0762	0.2691	0.05	524845	0.028332	0.08194	0.729518	308518	-0.13729	0.122244	0.261415	32760	-0.29261	0.220897	0.185293	33404	0.084304	0.126624	0.505553	573859					0					0					0					0					3509
DQA1*01:02~DQB1*06:03~DRB1*13:02		0				0				0				0				0					0					0					0					0					0	0.128315	0.265042	0.628292	0.04	2093
DQA1*05:01~DQB1*03:01~DRB1*11:04		0	0.126038	0.085331	0.139662	308518	0.039685	0.127314	0.75526	32760	-0.10043	0.2301	0.662499	33404	-0.17741	0.13186	0.178471	573859					0					0					0					0					3509					0
DQA1*03:03~DQB1*03:02~DRB1*04:05	0.01	524845				0				0				0				0					0	0.353632	0.773011	0.647331	0.02	471					0					0					0					0
DQA1*02:01~DQB1*02:02~DRB1*07:01	0.0102	0.0299	0.7344	0.2	524845	-0.00873	0.038321	0.819874	308518	0.062783	0.057171	0.272127	32760	-0.06809	0.103328	0.509903	33404	0.027092	0.05922	0.647325	573859	-0.11844	0.116387	0.308853	0.04	24376	1.33914	0.661819	0.04303	0.03	471	0.037441	0.10887	0.730921	0.09	4541	-0.02112	0.406016	0.958509	0.08	379					0	-0.03153	0.160126	0.843923
DQA1*03:03~DQB1*04:01~DRB1*04:05		0				0				0				0				0	0.00948	0.06703	0.887527	0.11	24376	-0.23649	0.271338	0.383434	0.14	471	0.0168	0.106574	0.874741	0.09	4541	0.266122	0.385747	0.490266	0.09	379	-0.01626	0.052268		0.11	3509	-0.07247	0.125696	0.564269	0.18	2093
DQA1*01:02~DQB1*05:02~DRB1*16:02		0				0				0				0				0	-0.04407	0.089392	0.621994	0.07	24376	-0.72132	0.318475	0.023517	0.12	471	0.106664	0.111808	0.340086	0.09	4541	-0.40921	0.329786	0.214671	0.12	379					0	0.568989	0.375168	0.129361	0.02	2093
DQA1*03:02~DQB1*03:03~DRB1*12:01		0				0				0				0				0					0					0					0					0					0	-0.06613	0.351997	0.850986	0.02	2093
DQA1*05:03~DQB1*03:01~DRB1*14:06		0				0				0				0				0					0					0					0					0	0.037851	0.248455	0.878914	0.02	3509					0
DQA1*01:01~DQB1*05:02~DRB1*15:02		0				0				0				0				0	-0.04992	0.182373	0.784305	0.02	24376	1.68101	1.10131	0.126918	0.01	471					0	0.363731	0.611074	0.551689	0.03	379					0					0
DQA1*01:02~DQB1*06:10~DRB1*15:01		0				0				0				0				0					0					0					0	0.142207	1.0939	0.896566	0.01	379					0					0
DQA1*01:01~DQB1*05:01~DRB1*15:02		0				0				0				0				0	0.087268	0.159377	0.583998	0.02	24376	-0.33204	0.772393	0.667278	0.02	471	-0.01943	0.219291	0.929395	0.02	4541	-0.81805	0.739151	0.268403	0.02	379					0					0
DQA1*01:01~DQB1*05:01~DRB1*01:03	0.01	524845				0				0				0				0					0					0					0					0					3509					0	0.026157
DQA1*03:01~DQB1*03:02~DRB1*04:05		0	0.026262	0.063837	0.680789	308518	-0.03809	0.095242	0.689185	32760	-0.04173	0.172138	0.80844	33404	-0.03908	0.098651	0.692013	573859					0					0					0					0					0					0	0.642014
DQA1*01:02~DQB1*05:02~DRB1*12:02		0				0				0				0				0					0	-0.55753	0.738932	0.450548	0.02	471	0.079925	0.263923	0.762015	0.01	4541					0					0					0
DQA1*01:02~DQB1*06:02~DRB1*15:03		0				0				0				0				0					0					0					0					0					3509					0
DQA1*01:02~DQB1*05:02~DRB1*15:02		0				0				0				0				0					0					0					0					0					3509					0
DQA1*05:05~DQB1*03:01~DRB1*01:03	0.01	524845				0				0				0				0					0					0					0					0					0					0
[truncated: 21 more columns]

## Sheet: amino acids
HLA	BETA_EUR_Yu2021	SE_EUR_Yu2021	P_EUR_Yu2021	Freq_EUR_Yu2021	N_EUR	BETA_23andMe_Chang2017	SE_23andMe_Chang2017	P_23andMe_Chang2017	N_Chang2017	BETA_23andMe_Nalls2014.v2	SE_23andMe_Nalls2014.v2	P_23andMe_Nalls2014.v2	N_Nalls2014.v2	BETA_23andMe_Nalls2014.v3	SE_23andMe_Nalls2014.v3	P_23andMe_Nalls2014.v3	N_Nalls2014.v3	BETA_23andMe_Nalls2018	SE_23andMe_Nalls2018	P_23andMe_Nalls2018	N_Nalls2018	BETA_SG_Foo2020	SE_SG_Foo2020	P_SG_Foo2020	Freq_SG_Foo2020	N_SG	BETA_TW_Foo2020	SE_TW_Foo2020	P_TW_Foo2020	Freq_TW_Foo2020	N_TW	BETA_CN_Foo2020	SE_CN_Foo2020	P_CN_Foo2020	Freq_CN_Foo2020	N_CN	BETA_HK_Foo2020	SE_HK_Foo2020	P_HK_Foo2020	Freq_HK_Foo2020	N_HK	BETA_Japan_Naito2021	SE_Japan_Naito2021	P_Japan_Naito2021	Freq_Japan_Naito2021	N_Japan	BETA_KR_Foo2020	SE_KR_Foo2020	P_KR_Foo2020
DRB1_13_H	-0.1408	0.024	4.32e-09	0.3	524845	-0.09536	0.020782	4.47e-06	308518	-0.14616	0.030989	2.4e-06	32760	-0.1213	0.056023	0.030377	33404	-0.07773	0.032119	0.015522	573859	-0.11112	0.053339	0.03723	0.23	21557	3.33e-05	0.218276	0.999878	0.26	467	-0.12228	0.079166	0.122445	0.19	4441	0.136896	0.279711	0.624544	0.19	377	0.023858	0.060422	0.692947	0.46	3509	-0.1026	0.105658	0.3315
DRB1_33_H	-0.1408	0.024	4.32e-09	0.3	524845	-0.09519	0.020784	4.65e-06	308518	-0.14586	0.030992	2.52e-06	32760	-0.12161	0.056029	0.029974	33404	-0.07783	0.032122	0.015394	573859	-0.11112	0.053339	0.03723	0.23	21557	3.33e-05	0.218276	0.999878	0.26	467	-0.11869	0.079371	0.134812	0.19	4441	0.136896	0.279711	0.624544	0.19	377	0.023858	0.060422	0.692947	0.46	3509	-0.09443	0.105748	0.37189
DRB1_11_V	-0.1363	0.0236	8.22e-09	0.31	524845	-0.08945	0.020614	1.43e-05	308518	-0.13789	0.03074	7.27e-06	32760	-0.07917	0.05559	0.154382	33404	-0.07721	0.031858	0.015366	573859	-0.06554	0.050965	0.198421	0.26	21557	0.168174	0.211683	0.426926	0.3	467	-0.12027	0.075641	0.111839	0.22	4441	0.024438	0.263949	0.926234	0.22	377	0.020335	0.059816	0.733886	0.47	3509	-0.16653	0.103549	0.107793
DQA1_26_S	-0.1294	0.0267	1.31e-06	0.2	524845				0				0				0				0	-0.03835	0.045601	0.400403	0.44	21354	0.28455	0.203435	0.161895	0.35	470	-0.01523	0.063112	0.809284	0.4	4527	0.026841	0.224818	0.904966	0.37	379					0	-0.14482	0.101553	0.153845
DQA1_56_R	-0.1294	0.0267	1.31e-06	0.2	524845				0				0				0				0	-0.03835	0.045601	0.400403	0.44	21354	0.28455	0.203435	0.161895	0.35	470	-0.01523	0.063112	0.809284	0.4	4527	0.026841	0.224818	0.904966	0.37	379					0	-0.14482	0.101553	0.153845
DQA1_47_Q	-0.1294	0.0267	1.31e-06	0.2	524845				0				0				0				0	-0.03835	0.045601	0.400403	0.44	21354	0.28455	0.203435	0.161895	0.35	470	-0.01523	0.063112	0.809284	0.4	4527	0.026841	0.224818	0.904966	0.37	379					0	-0.14482	0.101553	0.153845
DQA1_76_V	-0.1294	0.0267	1.31e-06	0.2	524845				0				0				0				0	-0.03835	0.045601	0.400403	0.44	21354	0.28455	0.203435	0.161895	0.35	470	-0.01523	0.063112	0.809284	0.4	4527	0.026841	0.224818	0.904966	0.37	379					0	-0.14482	0.101553	0.153845
DRB1_33_Ref	0.2461	0.0723	0.000666	0.97	524845				0				0				0				0	0.092315	0.150293	0.539064	0.98	21557	0.852027	0.515716	0.098509	0.96	467	0.279853	0.225359	0.214305	0.98	4441	-0.05542	0.945368	0.95325	0.99	377					0	-0.00329	0.234391	0.988817
DRB1_37_Y	-0.0658	0.0217	0.002427	0.49	524845				0				0				0				0	-0.07734	0.045029	0.085861	0.47	21557	0.230248	0.193289	0.23357	0.51	467	-0.09889	0.062925	0.116044	0.43	4441	-0.15382	0.223898	0.492081	0.41	377					0	-0.04433	0.100253	0.658334
DRB1_9_Ref	0.0798	0.0232	0.000571	0.68	524845				0				0				0				0	0.05792	0.047454	0.222257	0.35	21557	-0.09691	0.20566	0.637503	0.33	467	0.1029	0.063299	0.104028	0.44	4441	-0.34906	0.222085	0.116006	0.42	377					0	0.133226	0.100836	0.186433
DQB1_77_T	-0.1023	0.029	0.000421	0.85	524845				0				0				0				0	-0.0467	0.119281	0.695408	0.95	15320	0.351817	0.296938	0.236091	0.88	471	-0.21277	0.117244	0.069563	0.92	4511	-0.00266	0.342205	0.993806	0.89	379					0	0.060516	0.210033	0.77325
DQB1_71_T	-0.1111	0.0277	5.99e-05	0.83	524845				0				0				0				0	-0.03161	0.092684	0.733088	0.91	15320	0.318615	0.24797	0.19883	0.82	471	-0.08158	0.099595	0.41274	0.89	4511	-0.36417	0.317146	0.250853	0.87	379					0	0.007217	0.150504	0.961752
DQB1_75_L	-0.1111	0.0277	5.99e-05	0.83	524845				0				0				0				0	-0.03161	0.092684	0.733088	0.91	15320	0.318615	0.24797	0.19883	0.82	471	-0.08158	0.099595	0.41274	0.89	4511	-0.36417	0.317146	0.250853	0.87	379					0	0.007217	0.150504	0.961752
DQB1_74_E	-0.1111	0.0277	5.99e-05	0.83	524845				0				0				0				0	-0.03161	0.092684	0.733088	0.91	15320	0.318615	0.24797	0.19883	0.82	471	-0.08158	0.099595	0.41274	0.89	4511	-0.36417	0.317146	0.250853	0.87	379					0	0.007217	0.150504	0.961752
DQB1_57_A	-0.0766	0.0215	0.000363	0.41	524845				0				0				0				0	0.005094	0.054749	0.925864	0.36	15320	-0.09539	0.202499	0.637582	0.34	471	-0.04188	0.078054	0.591587	0.2	4511	0.491092	0.267313	0.066189	0.22	379					0	-0.00377	0.117228	0.974355
DRB1_9_E	-0.0813	0.0275	0.003086	0.81	524845				0				0				0				0	-0.06455	0.060995	0.289915	0.83	21557	-0.21255	0.267074	0.426122	0.85	467	-0.06029	0.07429	0.417085	0.77	4441	0.613866	0.272804	0.024436	0.8	377					0	-0.23801	0.141835	0.093337
DQB1_38_A	-0.0947	0.0287	0.000952	0.84	524845				0				0				0				0	-0.0833	0.080731	0.302141	0.88	15320	0.260917	0.240036	0.277041	0.8	471	-0.07532	0.085503	0.378392	0.84	4511	0.078855	0.271963	0.771856	0.8	379					0	0.111233	0.152085	0.464545
DQB1_30_Y	-0.064	0.0249	0.01004	0.77	524845				0				0				0				0	-0.03825	0.11793	0.745688	0.95	15320	0.351817	0.296938	0.236091	0.88	471	-0.23004	0.112729	0.041287	0.92	4511	0.06417	0.326104	0.844002	0.88	379					0	-0.06019	0.170336	0.723812
DRB1_37_Ref	0.055	0.0216	0.01102	0.49	524845				0				0				0				0	0.058699	0.047119	0.212853	0.35	21557	-0.26598	0.203706	0.191648	0.35	467	0.063485	0.064146	0.322322	0.38	4441	-0.36591	0.224245	0.10273	0.39	377					0	0.157553	0.102085	0.122746
DQA1_26_Ref	0.1127	0.0341	0.000967	0.89	524845				0				0				0				0	0.020286	0.053831	0.706294	0.77	21354	-0.14365	0.225291	0.523723	0.76	470	0.05278	0.076585	0.490722	0.79	4527	-0.3418	0.274663	0.213339	0.8	379					0	0.10859	0.118321	0.358747
DQB1_55_P	-0.055	0.0212	0.009619	0.56	524845				0				0				0				0	-0.09794	0.063276	0.121678	0.79	15320	0.242754	0.200548	0.226106	0.65	471	-0.00474	0.067602	0.94405	0.7	4511	0.059489	0.238708	0.803196	0.71	379					0	-0.05677	0.10108	0.574387
DRB1_47_F	0.0318	0.0246	0.1969	0.73	524845				0				0				0				0	0.101419	0.051936	0.050847	0.74	21557	0.091881	0.209643	0.661187	0.69	467	0.069135	0.066739	0.300254	0.68	4441	-0.15955	0.242128	0.509938	0.72	377					0	0.188666	0.103105	0.067272
DQB1_71_Ref	0.057	0.0242	0.0184	0.25	524845				0				0				0				0	0.146116	0.069872	0.036512	0.17	15320	-0.26316	0.219466	0.230492	0.27	471	0.109839	0.072313	0.128779	0.25	4511	-0.20437	0.24134	0.397107	0.28	379					0	-0.02909	0.117866	0.805033
DQB1_74_Ref	0.0636	0.0231	0.005815	0.3	524845				0				0				0				0	0.087221	0.057227	0.127479	0.3	15320	-0.25892	0.195985	0.186465	0.41	471	0.091937	0.065455	0.160146	0.35	4511	-0.14067	0.224534	0.530997	0.37	379					0	-0.05467	0.10093	0.588072
DRB1_31_Ref	0.0648	0.0253	0.01025	0.24	524845				0				0				0				0	0.008088	0.047699	0.865353	0.32	21557	0.183131	0.224942	0.415572	0.24	467	0.083874	0.065322	0.199143	0.35	4441	0.078814	0.236466	0.738907	0.31	377					0	-0.05228	0.108465	0.629806
DQA1_52_R	-0.0542	0.0212	0.01061	0.46	524845				0				0				0				0	-0.0212	0.050312	0.673538	0.72	21354	0.061585	0.20231	0.760818	0.65	470	-0.02182	0.064822	0.736366	0.65	4527	0.455537	0.232986	0.050558	0.68	379					0	-0.0492	0.098029	0.615758
DRB1_70_Ref	-0.0992	0.0269	0.000228	0.78	524845				0				0				0				0	0.029859	0.045178	0.508669	0.57	21557	-0.15846	0.197105	0.421435	0.6	467	0.013478	0.062367	0.828908	0.52	4441	0.298408	0.220853	0.176645	0.53	377					0	0.030954	0.104399	0.766852
DRB1_13_Ref	0.0594	0.0248	0.01657	0.25	524845				0				0				0				0	0.022049	0.046747	0.637159	0.35	21557	0.348389	0.218239	0.110408	0.28	467	0.089198	0.064411	0.166111	0.37	4441	-0.02592	0.231466	0.910843	0.33	377					0	-0.12714	0.1053	0.227275
DQB1_14_Ref	0.0528	0.0242	0.02873	0.26	524845				0				0				0				0	0.146116	0.069872	0.036512	0.17	15320	-0.26316	0.219466	0.230492	0.27	471	0.109839	0.072313	0.128779	0.25	4511	-0.20437	0.24134	0.397107	0.28	379					0	-0.02909	0.117866	0.805033
DQA1_76_L	0.0514	0.0212	0.01503	0.5	524845				0				0				0				0	0.014811	0.045728	0.74602	0.43	21354	-0.11024	0.195555	0.57293	0.41	470	0.0951	0.062887	0.130472	0.41	4527	0.347261	0.220117	0.114653	0.45	379					0	0.032052	0.108875	0.768458
DQA1_56_CNV	0.0514	0.0212	0.01503	0.5	524845				0				0				0				0	0.014811	0.045728	0.74602	0.43	21354	-0.11024	0.195555	0.57293	0.41	470	0.0951	0.062887	0.130472	0.41	4527	0.347261	0.220117	0.114653	0.45	379					0	0.032052	0.108875	0.768458
DQB1_75_Ref	0.044	0.0211	0.03692	0.5	524845				0				0				0				0	0.129281	0.052878	0.01449	0.46	15320	-0.47073	0.197087	0.01692	0.58	471	0.115132	0.062884	0.067119	0.43	4511	0.119764	0.218634	0.583842	0.48	379					0	-0.033	0.099842	0.741036
DRB1_78_V	0.0633	0.0238	0.007935	0.29	524845				0				0				0				0	-0.01768	0.046783	0.705528	0.36	21557	0.383758	0.220094	0.081227	0.26	467	0.064705	0.063509	0.308288	0.4	4441	0.103253	0.226308	0.648211	0.37	377					0	-0.14258	0.108586	0.189149
DQB1_70_R	-0.0693	0.025	0.005457	0.77	524845				0				0				0				0	0.105971	0.142555	0.457259	0.96	15320	0.096854	0.28607	0.734937	0.87	471	-0.04508	0.093634	0.630215	0.87	4511	0.253398	0.325354	0.436074	0.88	379					0	-0.01317	0.123775	0.915241
DQB1_70_Ref	0.0302	0.0212	0.1541	0.55	524845				0				0				0				0	0.139533	0.065941	0.034343	0.19	15320	-0.22596	0.203887	0.267758	0.35	471	0.157965	0.064245	0.013941	0.37	4511	-0.23305	0.226894	0.30435	0.35	379					0	0.094176	0.100895	0.350611
DQB1_77_Ref	0.0311	0.0211	0.1418	0.46	524845				0				0				0				0	0.16518	0.054687	0.002524	0.35	15320	-0.35623	0.194	0.066326	0.45	471	0.12212	0.066031	0.064395	0.34	4511	0.180278	0.223274	0.41942	0.4	379					0	0.017101	0.111854	0.878486
DQB1_89_Ref	0.0261	0.0216	0.2271	0.61	524845				0				0				0				0	0.121217	0.060646	0.045634	0.24	15320	-0.1667	0.197728	0.399176	0.4	471	0.171969	0.063124	0.006443	0.41	4511	-0.33874	0.223899	0.130297	0.38	379					0	0.114282	0.099301	0.249785
DQB1_84_Ref	0.0261	0.0216	0.2271	0.61	524845				0				0				0				0	0.121217	0.060646	0.045634	0.24	15320	-0.1667	0.197728	0.399176	0.4	471	0.171969	0.063124	0.006443	0.41	4511	-0.33874	0.223899	0.130297	0.38	379					0	0.114282	0.099301	0.249785
DQB1_90_Ref	0.0261	0.0216	0.2271	0.61	524845				0				0				0				0	0.121217	0.060646	0.045634	0.24	15320	-0.1667	0.197728	0.399176	0.4	471	0.171969	0.063124	0.006443	0.41	4511	-0.33874	0.223899	0.130297	0.38	379					0	0.114282	0.099301	0.249785
DQB1_85_Ref	0.0261	0.0216	0.2271	0.61	524845				0				0				0				0	0.121217	0.060646	0.045634	0.24	15320	-0.1667	0.197728	0.399176	0.4	471	0.171969	0.063124	0.006443	0.41	4511	-0.33874	0.223899	0.130297	0.38	379					0	0.114282	0.099301	0.249785
DRB1_73_G	0.0325	0.0218	0.1356	0.48	524845				0				0				0				0	0.088509	0.0539	0.100568	0.2	21557	-0.15223	0.219393	0.487758	0.25	467	0.166157	0.077687	0.03245	0.2	4441	0.505428	0.273602	0.064702	0.21	377					0	0.0297	0.136207	0.827392
DQB1_86_Ref	0.0279	0.0212	0.1893	0.55	524845				0				0				0				0	0.139533	0.065941	0.034343	0.19	15320	-0.22596	0.203887	0.267758	0.35	471	0.157965	0.064245	0.013941	0.37	4511	-0.23305	0.226894	0.30435	0.35	379					0	0.094176	0.100895	0.350611
DQB1_26_Ref	0.0623	0.0223	0.00527	0.34	524845				0				0				0				0	0.079533	0.057117	0.163787	0.3	15320	-0.29381	0.192881	0.127696	0.49	471	0.03185	0.063012	0.61324	0.42	4511	0.060823	0.218159	0.780396	0.45	379					0	-0.14635	0.099301	0.140526
DRB1_28_D	-0.095	0.0386	0.01386	0.91	524845				0				0				0				0	0.009079	0.059439	0.878601	0.82	21557	-0.71397	0.313821	0.0229	0.88	467	0.015068	0.077515	0.845878	0.8	4441	-0.14815	0.276626	0.592253	0.81	377					0	-0.07517	0.151056	0.618748
DQA1_34_Q	0.0392	0.0224	0.08011	0.66	524845				0				0				0				0	0.052491	0.051204	0.305298	0.73	21354	-0.22366	0.216494	0.30155	0.73	470	0.048176	0.067563	0.475816	0.7	4527	-0.23103	0.248674	0.352869	0.73	379					0	0.148777	0.10044	0.138539
DRB1_28_Ref	0.068	0.0216	0.00165	0.49	524845				0				0				0				0	-0.06653	0.046667	0.153989	0.38	21557	0.203666	0.214012	0.34127	0.3	467	0.011268	0.06423	0.860744	0.39	4441	0.30619	0.224608	0.172813	0.41	377					0	-0.10862	0.101331	0.283768
DRB1_30_Y	-0.0957	0.0386	0.01311	0.91	524845				0				0				0				0	0.008107	0.059442	0.891517	0.82	21557	-0.71397	0.313821	0.0229	0.88	467	0.02625	0.077783	0.735759	0.8	4441	-0.14815	0.276626	0.592253	0.81	377					0	-0.11398	0.153367	0.457362
DRB1_11_Ref	0.0538	0.026	0.03863	0.22	524845				0				0				0				0					0					0	0.337399	0.176936	0.056533	0.03	4441	1.1882	1.11909	0.288347	0.02	377					0	0.107604	0.151993	0.478973
DRB1_30_Ref	0.0538	0.026	0.03863	0.22	524845				0				0				0				0					0					0	0.337399	0.176936	0.056533	0.03	4441	1.1882	1.11909	0.288347	0.02	377					0	0.107604	0.151993	0.478973
DRB1_67_F	0.0825	0.0264	0.001784	0.24	524845				0				0				0				0	-0.05309	0.046064	0.249145	0.64	21557	0.157038	0.193191	0.416296	0.53	467	0.000817	0.063482	0.989726	0.59	4441	-0.08654	0.224888	0.700361	0.62	377					0	0.016878	0.103874	0.870923
DQB1_14_M	-0.0844	0.0416	0.04246	0.93	524845				0				0				0				0	0.024926	0.250187	0.920639	0.99	15320	0.201383	0.389231	0.604886	0.93	471	-0.13287	0.139874	0.342141	0.95	4511	0.35316	0.392827	0.368642	0.92	379					0	0.103331	0.220936	0.640002
DRB1_71_Ref	0.0862	0.0247	0.000485	0.73	524845				0				0				0				0	-0.15692	0.080127	0.050176	0.92	21557	0.197193	0.312745	0.528353	0.9	467	-0.20461	0.115285	0.07593	0.92	4441	-0.10231	0.404998	0.800571	0.92	377					0	-0.17108	0.179781	0.341305
DQA1_54_L	0.059	0.024	0.01379	0.26	524845				0				0				0				0	-0.17714	0.116981	0.129962	0.05	21354	1.33797	0.661811	0.04321	0.03	470	0.101322	0.103064	0.325558	0.1	4527	0.029944	0.400945	0.940466	0.08	379					0	-0.04762	0.154066	0.75723
DQA1_47_K	0.059	0.024	0.01379	0.26	524845				0				0				0				0	-0.17714	0.116981	0.129962	0.05	21354	1.33797	0.661811	0.04321	0.03	470	0.101322	0.103064	0.325558	0.1	4527	0.029944	0.400945	0.940466	0.08	379					0	-0.04762	0.154066	0.75723
DQA1_52_H	0.059	0.024	0.01379	0.26	524845				0				0				0				0	-0.17714	0.116981	0.129962	0.05	21354	1.33797	0.661811	0.04321	0.03	470	0.101322	0.103064	0.325558	0.1	4527	0.029944	0.400945	0.940466	0.08	379					0	-0.04762	0.154066	0.75723
DRB1_67_Ref	-0.0564	0.0232	0.01488	0.68	524845				0				0				0				0	0.01465	0.044711	0.743163	0.48	21557	-0.56228	0.19956	0.004839	0.61	467	0.050367	0.062709	0.421863	0.45	4441	0.339239	0.219983	0.123046	0.52	377					0	-0.11917	0.101459	0.240186
DRB1_25_Q	0.0579	0.0243	0.0173	0.27	524845				0				0				0				0	-0.19618	0.114988	0.087992	0.05	21557	1.33702	0.661777	0.043347	0.03	467	0.097939	0.103508	0.344046	0.1	4441	0.031392	0.401177	0.937629	0.08	377					0	-0.05425	0.155574	0.727315
DRB1_30_L	0.0579	0.0243	0.0173	0.27	524845				0				0				0				0	-0.19618	0.114988	0.087992	0.05	21557	1.33702	0.661777	0.043347	0.03	467	0.097939	0.103508	0.344046	0.1	4441	0.031392	0.401177	0.937629	0.08	377					0	-0.05425	0.155574	0.727315
DRB1_13_Y	0.0579	0.0243	0.0173	0.27	524845				0				0				0				0	-0.19618	0.114988	0.087992	0.05	21557	1.33702	0.661777	0.043347	0.03	467	0.097939	0.103508	0.344046	0.1	4441	0.031392	0.401177	0.937629	0.08	377					0	-0.05425	0.155574	0.727315
DRB1_14_K	0.0579	0.0243	0.0173	0.27	524845				0				0				0				0	-0.19618	0.114988	0.087992	0.05	21557	1.33702	0.661777	0.043347	0.03	467	0.097939	0.103508	0.344046	0.1	4441	0.031392	0.401177	0.937629	0.08	377					0	-0.05425	0.155574	0.727315
DRB1_11_G	0.0579	0.0243	0.0173	0.27	524845				0				0				0				0	-0.19618	0.114988	0.087992	0.05	21557	1.33702	0.661777	0.043347	0.03	467	0.097939	0.103508	0.344046	0.1	4441	0.031392	0.401177	0.937629	0.08	377					0	-0.05425	0.155574	0.727315
DRB1_74_Q	0.0579	0.0243	0.0173	0.27	524845				0				0				0				0	-0.19618	0.114988	0.087992	0.05	21557	1.33702	0.661777	0.043347	0.03	467	0.097939	0.103508	0.344046	0.1	4441	0.031392	0.401177	0.937629	0.08	377					0	-0.05425	0.155574	0.727315
DRB1_31_F	-0.1211	0.0832	0.1455	0.98	524845				0				0				0				0	-0.15703	0.09929	0.113767	0.95	21557	-0.75353	0.511201	0.14047	0.96	467	0.025144	0.126574	0.842535	0.94	4441	-0.44278	0.487745	0.363979	0.94	377					0	-0.05376	0.233403	0.817848
DRB1_60_S	0.0672	0.0232	0.003851	0.31	524845				0				0				0				0	-0.04187	0.045419	0.356546	0.6	21557	0.197084	0.194788	0.31164	0.46	467	-0.01574	0.063603	0.804579	0.6	4441	0.342869	0.223745	0.125422	0.61	377					0	-0.17264	0.100619	0.086199
DRB1_57_V	0.0672	0.0232	0.003851	0.31	524845				0				0				0				0	-0.04187	0.045419	0.356546	0.6	21557	0.197084	0.194788	0.31164	0.46	467	-0.01574	0.063603	0.804579	0.6	4441	0.342869	0.223745	0.125422	0.61	377					0	-0.17264	0.100619	0.086199
DRB1_13_R	0.021	0.0234	0.3701	0.31	524845				0				0				0				0	0.098642	0.048906	0.043699	0.3	21557	-0.19623	0.212944	0.356793	0.3	467	0.066621	0.066633	0.317394	0.33	4441	-0.44291	0.230673	0.054848	0.35	377					0	0.246575	0.118712	0.037794
DRB1_11_P	0.021	0.0234	0.3701	0.31	524845				0				0				0				0	0.098642	0.048906	0.043699	0.3	21557	-0.19623	0.212944	0.356793	0.3	467	0.066621	0.066633	0.317394	0.33	4441	-0.44291	0.230673	0.054848	0.35	377					0	0.246575	0.118712	0.037794
DRB1_26_F	-0.0643	0.0399	0.1067	0.92	524845				0				0				0				0	-0.05745	0.052698	0.275667	0.77	21557	-0.07106	0.244385	0.771226	0.81	467	0.023873	0.077758	0.758834	0.8	4441	-0.59407	0.267951	0.026617	0.78	377					0	-0.08855	0.166213	0.594193
DRB1_37_F	0.0576	0.0233	0.01329	0.31	524845				0				0				0				0	-0.13328	0.084237	0.113615	0.08	21557	0.072605	0.316763	0.818705	0.1	467	0.067215	0.086631	0.437824	0.16	4441	0.393421	0.313563	0.209596	0.15	377					0	-0.17577	0.127436	0.167807
DQB1_87_Ref	0.0325	0.0224	0.1464	0.33	524845				0				0				0				0	0.115925	0.062999	0.065751	0.22	15320	-0.20449	0.207578	0.324571	0.32	471	0.117238	0.068614	0.087514	0.3	4511	-0.3159	0.234505	0.17795	0.3	379					0	0.023776	0.104055	0.819263
DQA1_41_K	-0.0468	0.0322	0.1469	0.12	524845				0				0				0				0	0.024223	0.062384	0.697804	0.15	21354	0.270035	0.266669	0.31124	0.15	470	-0.23173	0.087988	0.008447	0.14	4527	-0.15741	0.309949	0.611549	0.15	379					0	-0.14734	0.124884	0.238077
DQA1_61_Ref	0.0364	0.0216	0.09205	0.61	524845				0				0				0				0	0.066923	0.045243	0.139087	0.48	21354	-0.05413	0.192246	0.778262	0.49	470	-0.00073	0.061964	0.990597	0.53	4527	-0.49488	0.218924	0.023791	0.51	379					0	0.103966	0.100251	0.299712
DQA1_55_Ref	0.0364	0.0216	0.09205	0.61	524845				0				0				0				0	0.066923	0.045243	0.139087	0.48	21354	-0.05413	0.192246	0.778262	0.49	470	-0.00073	0.061964	0.990597	0.53	4527	-0.49488	0.218924	0.023791	0.51	379					0	0.103966	0.100251	0.299712
DQA1_47_Ref	0.0364	0.0216	0.09205	0.61	524845				0				0				0				0	0.066923	0.045243	0.139087	0.48	21354	-0.05413	0.192246	0.778262	0.49	470	-0.00073	0.061964	0.990597	0.53	4527	-0.49488	0.218924	0.023791	0.51	379					0	0.103966	0.100251	0.299712
DQA1_64_Ref	0.0364	0.0216	0.09205	0.61	524845				0				0				0				0	0.066923	0.045243	0.139087	0.48	21354	-0.05413	0.192246	0.778262	0.49	470	-0.00073	0.061964	0.990597	0.53	4527	-0.49488	0.218924	0.023791	0.51	379					0	0.103966	0.100251	0.299712
DQA1_52_Ref	0.0364	0.0216	0.09205	0.61	524845				0				0				0				0	0.066923	0.045243	0.139087	0.48	21354	-0.05413	0.192246	0.778262	0.49	470	-0.00073	0.061964	0.990597	0.53	4527	-0.49488	0.218924	0.023791	0.51	379					0	0.103966	0.100251	0.299712
DQA1_53_Ref	0.0364	0.0216	0.09205	0.61	524845				0				0				0				0	0.066923	0.045243	0.139087	0.48	21354	-0.05413	0.192246	0.778262	0.49	470	-0.00073	0.061964	0.990597	0.53	4527	-0.49488	0.218924	0.023791	0.51	379					0	0.103966	0.100251	0.299712
DQA1_76_Ref	0.0364	0.0216	0.09205	0.61	524845				0				0				0				0	0.066923	0.045243	0.139087	0.48	21354	-0.05413	0.192246	0.778262	0.49	470	-0.00073	0.061964	0.990597	0.53	4527	-0.49488	0.218924	0.023791	0.51	379					0	0.103966	0.100251	0.299712
DQA1_50_Ref	0.0364	0.0216	0.09205	0.61	524845				0				0				0				0	0.066923	0.045243	0.139087	0.48	21354	-0.05413	0.192246	0.778262	0.49	470	-0.00073	0.061964	0.990597	0.53	4527	-0.49488	0.218924	0.023791	0.51	379					0	0.103966	0.100251	0.299712
DQA1_48_Ref	0.0364	0.0216	0.09205	0.61	524845				0				0				0				0	0.066923	0.045243	0.139087	0.48	21354	-0.05413	0.192246	0.778262	0.49	470	-0.00073	0.061964	0.990597	0.53	4527	-0.49488	0.218924	0.023791	0.51	379					0	0.103966	0.100251	0.299712
DQA1_80_Ref	0.0364	0.0216	0.09205	0.61	524845				0				0				0				0	0.066923	0.045243	0.139087	0.48	21354	-0.05413	0.192246	0.778262	0.49	470	-0.00073	0.061964	0.990597	0.53	4527	-0.49488	0.218924	0.023791	0.51	379					0	0.103966	0.100251	0.299712
DQA1_56_Ref	0.0364	0.0216	0.09205	0.61	524845				0				0				0				0	0.066923	0.045243	0.139087	0.48	21354	-0.05413	0.192246	0.778262	0.49	470	-0.00073	0.061964	0.990597	0.53	4527	-0.49488	0.218924	0.023791	0.51	379					0	0.103966	0.100251	0.299712
DQA1_18_Ref	0.0364	0.0216	0.09205	0.61	524845				0				0				0				0	0.066923	0.045243	0.139087	0.48	21354	-0.05413	0.192246	0.778262	0.49	470	-0.00073	0.061964	0.990597	0.53	4527	-0.49488	0.218924	0.023791	0.51	379					0	0.103966	0.100251	0.299712
DQA1_66_Ref	0.0364	0.0216	0.09205	0.61	524845				0				0				0				0	0.066923	0.045243	0.139087	0.48	21354	-0.05413	0.192246	0.778262	0.49	470	-0.00073	0.061964	0.990597	0.53	4527	-0.49488	0.218924	0.023791	0.51	379					0	0.103966	0.100251	0.299712
DQA1_69_Ref	0.0364	0.0216	0.09205	0.61	524845				0				0				0				0	0.066923	0.045243	0.139087	0.48	21354	-0.05413	0.192246	0.778262	0.49	470	-0.00073	0.061964	0.990597	0.53	4527	-0.49488	0.218924	0.023791	0.51	379					0	0.103966	0.100251	0.299712
DQA1_11_Ref	0.0364	0.0216	0.09205	0.61	524845				0				0				0				0	0.066923	0.045243	0.139087	0.48	21354	-0.05413	0.192246	0.778262	0.49	470	-0.00073	0.061964	0.990597	0.53	4527	-0.49488	0.218924	0.023791	0.51	379					0	0.103966	0.100251	0.299712
DQA1_45_Ref	0.0364	0.0216	0.09205	0.61	524845				0				0				0				0	0.066923	0.045243	0.139087	0.48	21354	-0.05413	0.192246	0.778262	0.49	470	-0.00073	0.061964	0.990597	0.53	4527	-0.49488	0.218924	0.023791	0.51	379					0	0.103966	0.100251	0.299712
DQB1_37_Ref	-0.0848	0.0458	0.06419	0.94	524845				0				0				0				0	0.004657	0.111919	0.966807	0.94	15320	0.050225	0.472158	0.915286	0.96	471	-0.08996	0.144944	0.534812	0.95	4511	-0.1064	0.626999	0.865249	0.97	379					0	-0.19233	0.294208	0.5133
DQB1_55_Ref	0.0413	0.0226	0.06761	0.68	524845				0				0				0				0	0.069812	0.053195	0.189398	0.54	15320	-0.08658	0.212661	0.683929	0.72	471	0.040179	0.067282	0.550385	0.7	4511	-0.09463	0.234686	0.686783	0.69	379					0	-0.09002	0.127803	0.481199
DQB1_53_Ref	0.0332	0.0221	0.1334	0.65	524845				0				0				0				0	0.099751	0.053128	0.060443	0.43	15320	-0.14728	0.197242	0.455242	0.62	471	0.009525	0.064244	0.882137	0.63	4511	-0.26817	0.224112	0.231468	0.62	379					0	0.011618	0.107888	0.914247
DQB1_90_T	-0.0318	0.0241	0.187	0.75	524845				0				0				0				0	-0.07264	0.097557	0.456496	0.92	15320	-0.1559	0.257514	0.544913	0.83	471	-0.03306	0.078375	0.673149	0.81	4511	0.249292	0.276142	0.366649	0.82	379					0	0.000226	0.112415	0.998395
DQB1_86_E	-0.0318	0.0241	0.187	0.75	524845				0				0				0				0	-0.07264	0.097557	0.456496	0.92	15320	-0.1559	0.257514	0.544913	0.83	471	-0.03306	0.078375	0.673149	0.81	4511	0.249292	0.276142	0.366649	0.82	379					0	0.000226	0.112415	0.998395
DQB1_87_L	-0.0318	0.0241	0.187	0.75	524845				0				0				0				0	-0.07264	0.097557	0.456496	0.92	15320	-0.1559	0.257514	0.544913	0.83	471	-0.03306	0.078375	0.673149	0.81	4511	0.249292	0.276142	0.366649	0.82	379					0	0.000226	0.112415	0.998395
DQB1_84_Q	-0.0318	0.0241	0.187	0.75	524845				0				0				0				0	-0.07264	0.097557	0.456496	0.92	15320	-0.1559	0.257514	0.544913	0.83	471	-0.03306	0.078375	0.673149	0.81	4511	0.249292	0.276142	0.366649	0.82	379					0	0.000226	0.112415	0.998395
DQB1_89_T	-0.0318	0.0241	0.187	0.75	524845				0				0				0				0	-0.07264	0.097557	0.456496	0.92	15320	-0.1559	0.257514	0.544913	0.83	471	-0.03306	0.078375	0.673149	0.81	4511	0.249292	0.276142	0.366649	0.82	379					0	0.000226	0.112415	0.998395
DQB1_53_L	-0.0318	0.0241	0.187	0.75	524845				0				0				0				0	-0.07264	0.097557	0.456496	0.92	15320	-0.1559	0.257514	0.544913	0.83	471	-0.03306	0.078375	0.673149	0.81	4511	0.249292	0.276142	0.366649	0.82	379					0	0.000226	0.112415	0.998395
DQB1_85_L	-0.0318	0.0241	0.187	0.75	524845				0				0				0				0	-0.07264	0.097557	0.456496	0.92	15320	-0.1559	0.257514	0.544913	0.83	471	-0.03306	0.078375	0.673149	0.81	4511	0.249292	0.276142	0.366649	0.82	379					0	0.000226	0.112415	0.998395
DQB1_46_Ref	-0.084	0.0469	0.07351	0.95	524845				0				0				0				0	0.31241	0.24215	0.196998	0.99	15320	-0.00743	1.00859	0.994123	0.99	471	-0.48594	0.318556	0.127151	0.99	4511	-14.4183	619.841	0.981442	0.99	379					0	-0.40187	0.657843	0.541275
DQB1_47_Ref	-0.084	0.0469	0.07351	0.95	524845				0				0				0				0	0.31241	0.24215	0.196998	0.99	15320	-0.00743	1.00859	0.994123	0.99	471	-0.48594	0.318556	0.127151	0.99	4511	-14.4183	619.841	0.981442	0.99	379					0	-0.40187	0.657843	0.541275
DQB1_52_Ref	-0.084	0.0469	0.07351	0.95	524845				0				0				0				0	0.31241	0.24215	0.196998	0.99	15320	-0.00743	1.00859	0.994123	0.99	471	-0.48594	0.318556	0.127151	0.99	4511	-14.4183	619.841	0.981442	0.99	379					0	-0.40187	0.657843	0.541275
DQB1_28_Ref	-0.084	0.0469	0.07351	0.95	524845				0				0				0				0	0.31241	0.24215	0.196998	0.99	15320	-0.00743	1.00859	0.994123	0.99	471	-0.48594	0.318556	0.127151	0.99	4511	-14.4183	619.841	0.981442	0.99	379					0	-0.40187	0.657843	0.541275
DRB1_78_Ref	-0.0422	0.0712	0.5539	0.98	524845				0				0				0				0	-0.10393	0.098716	0.292425	0.95	21557	-0.74099	0.51237	0.148122	0.96	467	-0.09789	0.114137	0.391096	0.92	4441	0.109064	0.486194	0.822506	0.95	377					0	-0.31911	0.273696	0.243638
DQB1_38_Ref	0.0305	0.0211	0.1488	0.51	524845				0				0				0				0	0.154747	0.053173	0.003611	0.52	15320	-0.21301	0.204974	0.298708	0.67	471	-0.03929	0.063036	0.533059	0.57	4511	0.198748	0.22709	0.381468	0.63	379					0	-0.09373	0.099323	0.345343
DRB1_16_Ref	-0.4742	0.2509	0.05882	1	524845				0				0				0				0	0.082631	0.080463	0.304446	0.91	21557	0.190126	0.38951	0.625468	0.93	467	0.281194	0.111862	0.011945	0.91	4441	-0.37146	0.378527	0.326435	0.9	377					0	0.140755	0.213605	0.509927
DQB1_94_Ref	-0.0703	0.0409	0.08567	0.93	524845				0				0				0				0	-0.06092	0.115527	0.597962	0.94	15320	0.13996	0.293944	0.633972	0.88	471	-0.04312	0.096093	0.653609	0.88	4511	0.253649	0.30022	0.398179	0.85	379					0	0.156436	0.15904	0.325299
DRB1_85_Ref	0.1362	0.3555	0.7015	1	524845				0				0				0				0	0.051104	0.112249	0.648913	0.95	21557	-0.09779	0.716937	0.891505	0.98	467	0.448146	0.160467	0.005226	0.96	4441	-0.5381	0.529731	0.309725	0.95	377					0	-0.17535	0.44473	0.693376
DRB1_73_Ref	-0.0583	0.0407	0.1515	0.92	524845				0				0				0				0	0.164225	0.166494	0.323951	0.98	21557	0.325584	0.595367	0.584473	0.97	467	-0.4709	0.204195	0.021104	0.97	4441	-16.2226	779.053	0.983386	0.98	377					0	-0.50431	0.459777	0.272706
DQA1_75_S	0.0045	0.0246	0.8561	0.25	524845				0				0				0				0	0.124343	0.057178	0.029656	0.17	21354	-0.34415	0.225038	0.126189	0.24	470	0.196153	0.088783	0.027151	0.14	4527	0.424188	0.294496	0.149758	0.17	379					0	0.082991	0.1827	0.649651
DQA1_50_L	-0.0253	0.0213	0.2354	0.43	524845				0				0				0				0	-0.06328	0.04533	0.16273	0.47	21354	0.393684	0.200514	0.049603	0.37	470	0.016873	0.061966	0.785394	0.47	4527	0.126157	0.218792	0.564207	0.44	379					0	-0.1057	0.098479	0.28314
DQA1_53_R	-0.0253	0.0213	0.2354	0.43	524845				0				0				0				0	-0.06328	0.04533	0.16273	0.47	21354	0.393684	0.200514	0.049603	0.37	470	0.016873	0.061966	0.785394	0.47	4527	0.126157	0.218792	0.564207	0.44	379					0	-0.1057	0.098479	0.28314
DRB1_71_K	-0.0684	0.0222	0.00205	0.44	524845				0				0				0				0	0.129799	0.057862	0.024879	0.16	21557	-0.37555	0.22948	0.101726	0.23	467	0.16446	0.096891	0.089624	0.12	4441	0.718142	0.326837	0.028003	0.14	377					0	0.207849	0.217657	0.339608
DQB1_9_Ref	-0.0719	0.0372	0.05299	0.91	524845				0				0				0				0	-0.04264	0.115901	0.712974	0.95	15320	0.186497	0.333214	0.57569	0.91	471	0.001285	0.099048	0.989648	0.89	4511	0.690127	0.417753	0.098535	0.92	379					0	0.039489	0.139434	0.777019
DQA1_5_Ref	0.0198	0.0213	0.3533	0.57	524845				0				0				0				0	0.061444	0.046549	0.186844	0.6	21354	0.093582	0.195207	0.631655	0.58	470	0.04298	0.063408	0.497873	0.61	4527	0.281427	0.222199	0.205315	0.6	379					0	-0.1282	0.098215	0.191788
DQB1_67_Ref	-0.0827	0.0417	0.04734	0.93	524845				0				0				0				0	-0.05243	0.085704	0.540737	0.9	15320	0.025473	0.334674	0.939329	0.92	471	0.106067	0.118934	0.372492	0.93	4511	-0.17768	0.465976	0.702972	0.94	379					0	-0.08868	0.188351	0.637759
DRB1_67_I	0.0234	0.0236	0.3215	0.69	524845				0				0				0				0	0.060232	0.044612	0.176974	0.5	21557	0.387295	0.193988	0.045881	0.46	467	-0.01451	0.063097	0.818162	0.56	4441	-0.28412	0.218596	0.193694	0.54	377					0	0.017243	0.10633	0.871177
DQB1_66_Ref	-0.0827	0.0417	0.04734	0.93	524845				0				0				0				0	-0.04651	0.085899	0.588164	0.9	15320	0.025473	0.334674	0.939329	0.92	471	0.106067	0.118934	0.372492	0.93	4511	-0.17768	0.465976	0.702972	0.94	379					0	-0.08868	0.188351	0.637759
DQA1_47_C	0.0295	0.0233	0.2045	0.29	524845				0				0				0				0	0.033187	0.046189	0.472442	0.4	21354	-0.22953	0.197688	0.245618	0.39	470	0.047659	0.066113	0.470988	0.33	4527	0.366177	0.223557	0.101431	0.4	379					0	0.099144	0.128768	0.441332
DQA1_40_G	0.0295	0.0233	0.2045	0.29	524845				0				0				0				0	0.033187	0.046189	0.472442	0.4	21354	-0.22953	0.197688	0.245618	0.39	470	0.047659	0.066113	0.470988	0.33	4527	0.366177	0.223557	0.101431	0.4	379					0	0.099144	0.128768	0.441332
DQA1_50_V	0.0295	0.0233	0.2045	0.29	524845				0				0				0				0	0.033187	0.046189	0.472442	0.4	21354	-0.22953	0.197688	0.245618	0.39	470	0.047659	0.066113	0.470988	0.33	4527	0.366177	0.223557	0.101431	0.4	379					0	0.099144	0.128768	0.441332
DQA1_53_Q	0.0295	0.0233	0.2045	0.29	524845				0				0				0				0	0.033187	0.046189	0.472442	0.4	21354	-0.22953	0.197688	0.245618	0.39	470	0.047659	0.066113	0.470988	0.33	4527	0.366177	0.223557	0.101431	0.4	379					0	0.099144	0.128768	0.441332
DQA1_51_L	0.0295	0.0233	0.2045	0.29	524845				0				0				0				0	0.033187	0.046189	0.472442	0.4	21354	-0.22953	0.197688	0.245618	0.39	470	0.047659	0.066113	0.470988	0.33	4527	0.366177	0.223557	0.101431	0.4	379					0	0.099144	0.128768	0.441332
DRB1_38_Ref	-0.4159	0.4954	0.4012	1	524845				0				0				0				0	0.087594	0.106781	0.412035	0.95	21557	-0.63711	0.585091	0.276196	0.97	467	0.393454	0.15235	0.009807	0.95	4441	-0.30537	0.478159	0.523053	0.94	377					0	-0.08468	0.36216	0.815125
DRB1_71_A	0.0015	0.0241	0.9503	0.28	524845				0				0				0				0	0.125512	0.051756	0.015305	0.25	21557	0.092673	0.244546	0.704718	0.2	467	0.036818	0.071742	0.607815	0.25	4441	-0.34168	0.254639	0.179657	0.25	377					0	0.202917	0.122211	0.096837
DRB1_26_Ref	0.0537	0.0245	0.02873	0.26	524845				0				0				0				0	-0.02521	0.047521	0.59569	0.35	21557	0.071833	0.2187	0.74257	0.28	467	-0.02634	0.068156	0.699172	0.3	4441	0.306915	0.232365	0.186558	0.35	377					0	-0.05981	0.107319	0.577285
DRB1_86_Ref	0.0257	0.0269	0.3393	0.8	524845				0				0				0				0	0.036434	0.054356	0.502681	0.77	21557	0.285812	0.23241	0.218781	0.77	467	0.122997	0.080587	0.126943	0.82	4441	-0.66317	0.27937	0.017606	0.79	377					0	-0.07025	0.146451	0.631434
DQB1_57_S	0.0371	0.059	0.529	0.05	524845				0				0				0				0	0.158718	0.077562	0.040723	0.13	15320	-0.38295	0.233691	0.101279	0.23	471	0.076485	0.081904	0.350387	0.18	4511	-0.18365	0.258363	0.477193	0.23	379					0	-0.03558	0.19859	0.857808
DQA1_10_Ref	0.0199	0.0464	0.6685	0.94	524845				0				0				0				0	0.073882	0.072553	0.308529	0.88	21354	0.1454	0.270025	0.590253	0.85	470	0.121992	0.098745	0.216669	0.89	4527	-0.27195	0.336312	0.418726	0.88	379					0	0.183278	0.164696	0.265785
DQA1_9_Ref	0.0199	0.0464	0.6685	0.94	524845				0				0				0				0	0.073882	0.072553	0.308529	0.88	21354	0.1454	0.270025	0.590253	0.85	470	0.121992	0.098745	0.216669	0.89	4527	-0.27195	0.336312	0.418726	0.88	379					0	0.183278	0.164696	0.265785
DQA1_8_Ref	0.0199	0.0464	0.6685	0.94	524845				0				0				0				0	0.073882	0.072553	0.308529	0.88	21354	0.1454	0.270025	0.590253	0.85	470	0.121992	0.098745	0.216669	0.89	4527	-0.27195	0.336312	0.418726	0.88	379					0	0.183278	0.164696	0.265785
DQA1_7_Ref	0.0199	0.0464	0.6685	0.94	524845				0				0				0				0	0.073882	0.072553	0.308529	0.88	21354	0.1454	0.270025	0.590253	0.85	470	0.121992	0.098745	0.216669	0.89	4527	-0.27195	0.336312	0.418726	0.88	379					0	0.183278	0.164696	0.265785
DQB1_57_Ref	0.0249	0.023	0.2792	0.3	524845				0				0				0				0	0.04835	0.087633	0.58113	0.09	15320	0.247264	0.314581	0.43186	0.11	471	0.144928	0.092739	0.118108	0.13	4511	-0.47348	0.363489	0.192715	0.09	379					0	0.032961	0.108916	0.762175
DQA1_6_Ref	0.0199	0.0464	0.6685	0.94	524845				0				0				0				0	0.073882	0.072553	0.308529	0.88	21354	0.1454	0.270025	0.590253	0.85	470	0.121992	0.098745	0.216669	0.89	4527	-0.27195	0.336312	0.418726	0.88	379					0	0.183278	0.164696	0.265785
DRB1_57_Ref	-0.071	0.0471	0.1315	0.95	524845	-0.00473	0.023342	0.839393	308518	0.083895	0.034817	0.015969	32760	0.04442	0.062938	0.480331	33404	0.02881	0.036071	0.424462	573859	0.02119	0.049258	0.667071	0.71	21557	-0.24582	0.228512	0.282033	0.77	467	0.057314	0.068005	0.399348	0.7	4441	-0.09172	0.240465	0.702878	0.7	377	0.061166	0.05329	0.251046	0.72	3509	0.13142	0.122279	0.282485
DRB1_37_N	-0.0057	0.0218	0.7933	0.44	524845				0				0				0				0	0.076197	0.044636	0.087809	0.49	21557	0.078269	0.19266	0.684554	0.48	467	0.074038	0.062496	0.236147	0.46	4441	0.298619	0.220624	0.175889	0.44	377					0	0.068615	0.10149	0.498991
DRB1_26_Y	0.0099	0.0244	0.6853	0.28	524845				0				0				0				0	0.054371	0.04472	0.224056	0.45	21557	-0.01574	0.19419	0.935386	0.43	467	0.070109	0.063449	0.269175	0.41	4441	0.353418	0.222974	0.112961	0.41	377					0	-0.07099	0.117635	0.546216
DRB1_6_Ref	-0.5345	0.6417	0.4049	1	524845				0				0				0				0	0.052315	0.090248	0.562131	0.93	21557	0.80851	0.383838	0.035171	0.92	467	0.110621	0.126797	0.382977	0.93	4441	0.155077	0.391482	0.692012	0.92	377					0	0.115935	0.259913	0.655559
DRB1_87_Ref	-0.082	0.0684	0.2305	0.97	524845				0				0				0				0	0.127225	0.215847	0.555578	0.99	21557	0.118433	0.568884	0.835085	0.97	467	-0.24922	0.180181	0.166616	0.97	4441	0.882556	0.640108	0.167969	0.97	377					0	-0.06625	0.330285	0.841025
DRB1_74_E	-0.0128	0.0365	0.7263	0.1	524845				0				0				0				0	-0.03628	0.045187	0.422069	0.42	21557	0.123929	0.19961	0.534696	0.38	467	-0.01094	0.063042	0.862227	0.43	4441	0.136086	0.222145	0.54014	0.4	377					0	-0.18347	0.103381	0.075947
DRB1_74_R	0.001	0.0249	0.9666	0.26	524845				0				0				0				0	0.141943	0.057993	0.014382	0.16	21557	-0.3484	0.229996	0.129816	0.22	467	0.173433	0.101939	0.08888	0.11	4441	0.795668	0.333135	0.016921	0.14	377					0	0.233433	0.245953	0.342571
DRB1_77_N	0.001	0.0249	0.9666	0.26	524845				0				0				0				0	0.141943	0.057993	0.014382	0.16	21557	-0.3484	0.229996	0.129816	0.22	467	0.173433	0.101939	0.08888	0.11	4441	0.795668	0.333135	0.016921	0.14	377					0	0.233433	0.245953	0.342571
DRB1_7_Ref	-1.3696	1.0497	0.192	1	524845				0				0				0				0					0					0					0					0					0
DQB1_30_S	0.0044	0.0246	0.8585	0.25	524845				0				0				0				0	0.144856	0.063299	0.022113	0.2	15320	-0.32498	0.230316	0.158246	0.22	471	0.164872	0.102203	0.106706	0.1	4511	0.745164	0.335291	0.026253	0.13	379					0	0.208949	0.246165	0.395983
DQB1_46_E	0.0044	0.0246	0.8585	0.25	524845				0				0				0				0	0.144856	0.063299	0.022113	0.2	15320	-0.32498	0.230316	0.158246	0.22	471	0.164872	0.102203	0.106706	0.1	4511	0.745164	0.335291	0.026253	0.13	379					0	0.208949	0.246165	0.395983
DQB1_74_A	0.0044	0.0246	0.8585	0.25	524845				0				0				0				0	0.144856	0.063299	0.022113	0.2	15320	-0.32498	0.230316	0.158246	0.22	471	0.164872	0.102203	0.106706	0.1	4511	0.745164	0.335291	0.026253	0.13	379					0	0.208949	0.246165	0.395983
DQB1_55_L	0.0044	0.0246	0.8585	0.25	524845				0				0				0				0	0.144856	0.063299	0.022113	0.2	15320	-0.32498	0.230316	0.158246	0.22	471	0.164872	0.102203	0.106706	0.1	4511	0.745164	0.335291	0.026253	0.13	379					0	0.208949	0.246165	0.395983
DQB1_52_L	0.0044	0.0246	0.8585	0.25	524845				0				0				0				0	0.144856	0.063299	0.022113	0.2	15320	-0.32498	0.230316	0.158246	0.22	471	0.164872	0.102203	0.106706	0.1	4511	0.745164	0.335291	0.026253	0.13	379					0	0.208949	0.246165	0.395983
DQB1_71_K	0.0044	0.0246	0.8585	0.25	524845				0				0				0				0	0.144856	0.063299	0.022113	0.2	15320	-0.32498	0.230316	0.158246	0.22	471	0.164872	0.102203	0.106706	0.1	4511	0.745164	0.335291	0.026253	0.13	379					0	0.208949	0.246165	0.395983
DQB1_47_F	0.0044	0.0246	0.8585	0.25	524845				0				0				0				0	0.144856	0.063299	0.022113	0.2	15320	-0.32498	0.230316	0.158246	0.22	471	0.164872	0.102203	0.106706	0.1	4511	0.745164	0.335291	0.026253	0.13	379					0	0.208949	0.246165	0.395983
DQB1_28_S	0.0044	0.0246	0.8585	0.25	524845				0				0				0				0	0.144856	0.063299	0.022113	0.2	15320	-0.32498	0.230316	0.158246	0.22	471	0.164872	0.102203	0.106706	0.1	4511	0.745164	0.335291	0.026253	0.13	379					0	0.208949	0.246165	0.395983
DQB1_37_I	0.0044	0.0246	0.8585	0.25	524845				0				0				0				0	0.144856	0.063299	0.022113	0.2	15320	-0.32498	0.230316	0.158246	0.22	471	0.164872	0.102203	0.106706	0.1	4511	0.745164	0.335291	0.026253	0.13	379					0	0.208949	0.246165	0.395983
DQB1_13_A	-0.0212	0.0222	0.3393	0.36	524845				0				0				0				0	-0.05532	0.054037	0.305909	0.62	15320	0.11603	0.192596	0.546873	0.53	471	-0.09492	0.062368	0.128039	0.55	4511	-0.07903	0.225497	0.725977	0.62	379					0	-0.00463	0.100589	0.963303
DQB1_26_Y	-0.0212	0.0222	0.3393	0.36	524845				0				0				0				0	-0.05532	0.054037	0.305909	0.62	15320	0.11603	0.192596	0.546873	0.53	471	-0.09492	0.062368	0.128039	0.55	4511	-0.07903	0.225497	0.725977	0.62	379					0	-0.00463	0.100589	0.963303
DQB1_37_D	-0.0209	0.0942	0.8242	0.02	524845				0				0				0				0	0.039073	0.063146	0.53607	0.22	15320	0.312678	0.235525	0.184318	0.21	471	-0.19784	0.075908	0.009153	0.21	4511	-0.22877	0.25761	0.374513	0.24	379					0	-0.09756	0.124938	0.434872
DRB1_11_D	0.0844	0.0723	0.2432	0.02	524845				0				0				0				0	0.012944	0.047906	0.787011	0.32	21557	0.259173	0.227344	0.254285	0.24	467	0.039959	0.066517	0.548022	0.32	4441	-0.00548	0.238371	0.981673	0.3	377					0	-0.14901	0.12541	0.234751
DRB1_9_K	0.0844	0.0723	0.2432	0.02	524845				0				0				0				0	0.012944	0.047906	0.787011	0.32	21557	0.259173	0.227344	0.254285	0.24	467	0.039959	0.066517	0.548022	0.32	4441	-0.00548	0.238371	0.981673	0.3	377					0	-0.14901	0.12541	0.234751
DRB1_28_H	0.0844	0.0723	0.2432	0.02	524845				0				0				0				0	0.012944	0.047906	0.787011	0.32	21557	0.259173	0.227344	0.254285	0.24	467	0.039959	0.066517	0.548022	0.32	4441	-0.00548	0.238371	0.981673	0.3	377					0	-0.14901	0.12541	0.234751
DRB1_30_G	0.0844	0.0723	0.2432	0.02	524845				0				0				0				0	0.012944	0.047906	0.787011	0.32	21557	0.259173	0.227344	0.254285	0.24	467	0.039959	0.066517	0.548022	0.32	4441	-0.00548	0.238371	0.981673	0.3	377					0	-0.14901	0.12541	0.234751
DQB1_56_Ref	-0.1407	0.0838	0.09336	0.98	524845				0				0				0				0	0.682751	0.366511	0.062484	0.99	15320	-1.12871	1.16284	0.331725	0.99	471	-0.07761	0.291401	0.789979	0.99	4511	-0.16338	1.42601	0.908782	0.99	379					0	-0.09314	0.290835	0.748789
DRB1_25_Ref	-0.031	0.0774	0.6891	0.98	524845				0				0				0				0	-0.06639	0.434637	0.878593	1	21557	0.75562	1.23106	0.539351	0.99	467	-0.65735	0.298887	0.027856	0.99	4441	-13.9451	620.26	0.982063	0.99	377					0	-0.31228	0.470713	0.507059
DQA1_69_L	-0.0326	0.0217	0.1321	0.61	524845				0				0				0				0	-0.01675	0.04625	0.717308	0.6	21354	0.109091	0.193769	0.573439	0.56	470	0.06989	0.062583	0.264094	0.57	4527	0.353169	0.2199	0.108264	0.56	379					0	-0.06855	0.098094	0.484645
DQB1_15_Ref	-0.0599	0.0839	0.475	0.98	524845				0				0				0				0	10.404	131.452	0.936916	1	15320	14.4909	623.819	0.981467	1	471	-0.5056	0.307479	0.100106	0.99	4511	-0.17768	1.43722	0.901613	0.99	379					0	0.375938	0.38469	0.328445
DQB1_17_Ref	-0.0599	0.0839	0.475	0.98	524845				0				0				0				0	10.404	131.452	0.936916	1	15320	14.4909	623.819	0.981467	1	471	-0.5056	0.307479	0.100106	0.99	4511	-0.17768	1.43722	0.901613	0.99	379					0	0.375938	0.38469	0.328445
DQB1_16_Ref	-0.0599	0.0839	0.475	0.98	524845				0				0				0				0	10.404	131.452	0.936916	1	15320	14.4909	623.819	0.981467	1	471	-0.5056	0.307479	0.100106	0.99	4511	-0.17768	1.43722	0.901613	0.99	379					0	0.375938	0.38469	0.328445
DQB1_19_Ref	-0.0599	0.0839	0.475	0.98	524845				0				0				0				0	10.404	131.452	0.936916	1	15320	14.4909	623.819	0.981467	1	471	-0.5056	0.307479	0.100106	0.99	4511	-0.17768	1.43722	0.901613	0.99	379					0	0.375938	0.38469	0.328445
DQB1_79_Ref	-0.0599	0.0839	0.475	0.98	524845				0				0				0				0	10.404	131.452	0.936916	1	15320	14.4909	623.819	0.981467	1	471	-0.5056	0.307479	0.100106	0.99	4511	-0.17768	1.43722	0.901613	0.99	379					0	0.375938	0.38469	0.328445
DQB1_76_Ref	-0.0599	0.0839	0.475	0.98	524845				0				0				0				0	10.404	131.452	0.936916	1	15320	14.4909	623.819	0.981467	1	471	-0.5056	0.307479	0.100106	0.99	4511	-0.17768	1.43722	0.901613	0.99	379					0	0.375938	0.38469	0.328445
DQB1_18_Ref	-0.0599	0.0839	0.475	0.98	524845				0				0				0				0	10.404	131.452	0.936916	1	15320	14.4909	623.819	0.981467	1	471	-0.5056	0.307479	0.100106	0.99	4511	-0.17768	1.43722	0.901613	0.99	379					0	0.375938	0.38469	0.328445
DQB1_78_Ref	-0.0599	0.0839	0.475	0.98	524845				0				0				0				0	10.404	131.452	0.936916	1	15320	14.4909	623.819	0.981467	1	471	-0.5056	0.307479	0.100106	0.99	4511	-0.17768	1.43722	0.901613	0.99	379					0	0.375938	0.38469	0.328445
DQB1_20_Ref	-0.0599	0.0839	0.475	0.98	524845				0				0				0				0	10.404	131.452	0.936916	1	15320	14.4909	623.819	0.981467	1	471	-0.5056	0.307479	0.100106	0.99	4511	-0.17768	1.43722	0.901613	0.99	379					0	0.375938	0.38469	0.328445
DQB1_72_Ref	-0.0599	0.0839	0.475	0.98	524845				0				0				0				0	10.404	131.452	0.936916	1	15320	14.4909	623.819	0.981467	1	471	-0.5056	0.307479	0.100106	0.99	4511	-0.17768	1.43722	0.901613	0.99	379					0	0.375938	0.38469	0.328445
DQB1_80_Ref	-0.0599	0.0839	0.475	0.98	524845				0				0				0				0	10.404	131.452	0.936916	1	15320	14.4909	623.819	0.981467	1	471	-0.5056	0.307479	0.100106	0.99	4511	-0.17768	1.43722	0.901613	0.99	379					0	0.375938	0.38469	0.328445
DQB1_73_Ref	-0.0599	0.0839	0.475	0.98	524845				0				0				0				0	10.404	131.452	0.936916	1	15320	14.4909	623.819	0.981467	1	471	-0.5056	0.307479	0.100106	0.99	4511	-0.17768	1.43722	0.901613	0.99	379					0	0.375938	0.38469	0.328445
DQB1_30_Ref	0.0162	0.0212	0.4466	0.44	524845				0				0				0				0	0.154203	0.068325	0.024013	0.18	15320	-0.25704	0.200723	0.200343	0.38	471	0.005893	0.065333	0.928125	0.35	4511	-0.00226	0.224189	0.99195	0.37	379					0	-0.05207	0.101208	0.606913
DRB1_70_R	0.0187	0.0382	0.6254	0.09	524845				0				0				0				0	0.035401	0.046332	0.444825	0.36	21557	0.237671	0.208413	0.254126	0.33	467	0.057658	0.063968	0.367396	0.38	4441	0.036443	0.225005	0.871334	0.37	377					0	-0.2719	0.110151	0.013571
DQB1_45_E	-0.0209	0.0223	0.3492	0.35	524845				0				0				0				0	-0.1108	0.053417	0.03805	0.46	15320	0.019934	0.200504	0.920806	0.37	471	0.010481	0.063649	0.869199	0.39	4511	-0.02537	0.22113	0.908659	0.44	379					0	0.066335	0.113741	0.559751
DRB1_14_Ref	-0.0191	0.0768	0.8037	0.98	524845				0				0				0				0	-0.06639	0.434637	0.878593	1	21557	0.75562	1.23106	0.539351	0.99	467	-0.65735	0.298887	0.027856	0.99	4441	-13.9451	620.26	0.982063	0.99	377					0	-0.31228	0.470713	0.507059
DQB1_9_F	0.0287	0.0232	0.2167	0.3	524845				0				0				0				0	-0.02771	0.071275	0.697412	0.16	15320	-0.22415	0.227265	0.323982	0.23	471	0.039138	0.074621	0.59994	0.23	4511	0.243829	0.307347	0.427583	0.16	379					0	0.000233	0.104353	0.998217
DRB1_74_Ref	-0.0715	0.0327	0.02857	0.87	524845				0				0				0				0	0.039868	0.05393	0.459754	0.78	21557	-0.13564	0.235884	0.565285	0.79	467	0.012397	0.074286	0.867463	0.77	4441	-0.57194	0.278125	0.039744	0.8	377					0	0.220547	0.127534	0.083752
DRB1_13_S	-0.009	0.022	0.684	0.58	524845				0				0				0				0	0.034333	0.046342	0.458774	0.36	21557	-0.35442	0.19405	0.067785	0.46	467	0.153414	0.065022	0.018304	0.36	4441	0.13883	0.229016	0.544379	0.36	377					0	0.013134	0.10272	0.898256
DRB1_58_E	0.0451	0.0313	0.1493	0.16	524845				0				0				0				0	-0.13579	0.063833	0.033391	0.15	21557	-0.02752	0.261274	0.91612	0.16	467	0.088352	0.091051	0.331871	0.14	4441	-0.44367	0.336959	0.187946	0.12	377					0	0.210062	0.175296	0.230791
DQA1_41_Ref	0.015	0.0376	0.6888	0.91	524845				0				0				0				0	0.010801	0.077861	0.889672	0.91	21354	0.373515	0.279237	0.181018	0.87	470	0.052083	0.107631	0.628457	0.91	4527	0.305103	0.358833	0.395178	0.9	379					0	0.189445	0.14938	0.204722
DQA1_18_S	-0.0176	0.022	0.4248	0.64	524845				0				0				0				0	-0.04116	0.05159	0.424996	0.75	21354	0.148134	0.205332	0.47064	0.67	470	0.030565	0.067929	0.65274	0.71	4527	0.590067	0.242216	0.014846	0.72	379					0	-0.03378	0.09947	0.734159
DQA1_45_V	-0.0176	0.022	0.4248	0.64	524845				0				0				0				0	-0.04116	0.05159	0.424996	0.75	21354	0.148134	0.205332	0.47064	0.67	470	0.030565	0.067929	0.65274	0.71	4527	0.590067	0.242216	0.014846	0.72	379					0	-0.03378	0.09947	0.734159
DQA1_55_R	-0.0176	0.022	0.4248	0.64	524845				0				0				0				0	-0.04116	0.05159	0.424996	0.75	21354	0.148134	0.205332	0.47064	0.67	470	0.030565	0.067929	0.65274	0.71	4527	0.590067	0.242216	0.014846	0.72	379					0	-0.03378	0.09947	0.734159
DQA1_66_I	-0.0176	0.022	0.4248	0.64	524845				0				0				0				0	-0.04116	0.05159	0.424996	0.75	21354	0.148134	0.205332	0.47064	0.67	470	0.030565	0.067929	0.65274	0.71	4527	0.590067	0.242216	0.014846	0.72	379					0	-0.03378	0.09947	0.734159
DQA1_48_L	-0.0176	0.022	0.4248	0.64	524845				0				0				0				0	-0.04116	0.05159	0.424996	0.75	21354	0.148134	0.205332	0.47064	0.67	470	0.030565	0.067929	0.65274	0.71	4527	0.590067	0.242216	0.014846	0.72	379					0	-0.03378	0.09947	0.734159
DQA1_80_S	-0.0176	0.022	0.4248	0.64	524845				0				0				0				0	-0.04116	0.05159	0.424996	0.75	21354	0.148134	0.205332	0.47064	0.67	470	0.030565	0.067929	0.65274	0.71	4527	0.590067	0.242216	0.014846	0.72	379					0	-0.03378	0.09947	0.734159
DQA1_61_F	-0.0176	0.022	0.4248	0.64	524845				0				0				0				0	-0.04116	0.05159	0.424996	0.75	21354	0.148134	0.205332	0.47064	0.67	470	0.030565	0.067929	0.65274	0.71	4527	0.590067	0.242216	0.014846	0.72	379					0	-0.03378	0.09947	0.734159
DQA1_64_T	-0.0176	0.022	0.4248	0.64	524845				0				0				0				0	-0.04116	0.05159	0.424996	0.75	21354	0.148134	0.205332	0.47064	0.67	470	0.030565	0.067929	0.65274	0.71	4527	0.590067	0.242216	0.014846	0.72	379					0	-0.03378	0.09947	0.734159
DRB1_91_Ref	-0.064	0.0621	0.3027	0.97	524845				0				0				0				0	-0.01436	0.093849	0.87839	0.93	21557	0.385503	0.423016	0.362126	0.94	467	0.000843	0.111746	0.993983	0.92	4441	0.483271	0.35677	0.175554	0.89	377					0	-0.24911	0.293186	0.395508
DRB1_88_Ref	-0.082	0.0684	0.2305	0.97	524845				0				0				0				0	-0.01436	0.093849	0.87839	0.93	21557	0.385503	0.423016	0.362126	0.94	467	0.000843	0.111746	0.993983	0.92	4441	0.483271	0.35677	0.175554	0.89	377					0	-0.24911	0.293186	0.395508
DRB1_89_Ref	-0.082	0.0684	0.2305	0.97	524845				0				0				0				0	-0.01436	0.093849	0.87839	0.93	21557	0.385503	0.423016	0.362126	0.94	467	0.000843	0.111746	0.993983	0.92	4441	0.483271	0.35677	0.175554	0.89	377					0	-0.24911	0.293186	0.395508
DRB1_90_Ref	-0.082	0.0684	0.2305	0.97	524845				0				0				0				0	-0.01436	0.093849	0.87839	0.93	21557	0.385503	0.423016	0.362126	0.94	467	0.000843	0.111746	0.993983	0.92	4441	0.483271	0.35677	0.175554	0.89	377					0	-0.24911	0.293186	0.395508
DRB1_32_Ref	0.0338	0.0402	0.3999	0.92	524845				0				0				0				0	-0.03379	0.066403	0.610879	0.87	21557	0.190769	0.28151	0.497985	0.87	467	0.165241	0.102194	0.105893	0.9	4441	-0.38552	0.3307	0.243708	0.87	377					0	-0.04358	0.166646	0.793712
DRB1_37_L	0.0423	0.0613	0.4901	0.03	524845				0				0				0				0	-0.05657	0.048942	0.247769	0.31	21557	-0.00577	0.227083	0.979732	0.24	467	-0.07895	0.072533	0.27641	0.25	4441	0.279311	0.239733	0.243982	0.31	377					0	-0.07225	0.133512	0.588401
DRB1_38_L	0.0423	0.0613	0.4901	0.03	524845				0				0				0				0	-0.05657	0.048942	0.247769	0.31	21557	-0.00577	0.227083	0.979732	0.24	467	-0.07895	0.072533	0.27641	0.25	4441	0.279311	0.239733	0.243982	0.31	377					0	-0.07225	0.133512	0.588401
DRB1_92_Ref	-0.066	0.0621	0.2883	0.97	524845				0				0				0				0	-0.03172	0.092992	0.733064	0.93	21557	0.385503	0.423016	0.362126	0.94	467	0.007743	0.111315	0.944547	0.91	4441	0.408801	0.351595	0.244949	0.89	377					0	-0.31449	0.282308	0.265276
DRB1_93_Ref	-0.066	0.0621	0.2883	0.97	524845				0				0				0				0	-0.03172	0.092992	0.733064	0.93	21557	0.385503	0.423016	0.362126	0.94	467	0.007743	0.111315	0.944547	0.91	4441	0.408801	0.351595	0.244949	0.89	377					0	-0.31449	0.282308	0.265276
DQA1_11_Y	-0.0201	0.022	0.3595	0.63	524845				0				0				0				0	-0.01824	0.046552	0.695171	0.61	21354	0.092426	0.194489	0.634627	0.57	470	0.056744	0.062749	0.365836	0.58	4527	0.346811	0.220092	0.115083	0.57	379					0	-0.03712	0.09824	0.705562
DRB1_30_H	0.0422	0.0613	0.4909	0.03	524845				0				0				0				0	-0.05657	0.048942	0.247769	0.31	21557	-0.00577	0.227083	0.979732	0.24	467	-0.07895	0.072533	0.27641	0.25	4441	0.279311	0.239733	0.243982	0.31	377					0	-0.07225	0.133512	0.588401
DQA1_25_Ref	-0.0036	0.0271	0.8934	0.81	524845				0				0				0				0	0.054893	0.057701	0.341436	0.8	21354	0.04752	0.226281	0.833665	0.77	470	0.090949	0.07554	0.228593	0.78	4527	-0.05561	0.262828	0.832421	0.78	379					0	0.134657	0.120314	0.26305
DQB1_13_Ref	-0.0061	0.0343	0.8598	0.89	524845				0				0				0				0	0.074915	0.074789	0.316497	0.84	15320	0.007797	0.278989	0.977705	0.86	471	0.124193	0.079654	0.118958	0.81	4511	0.327584	0.275871	0.235048	0.81	379					0	0.05429	0.152193	0.721302
DRB1_5_Ref	0.1569	0.0829	0.0585	0.02	524845				0				0				0				0	-0.31072	0.190404	0.102702	0.02	21557	0.00221	0.717189	0.997541	0.02	467	-0.33149	0.291717	0.255814	0.01	4441					0					0	0.165107	0.478917	0.730281
DRB1_95_Ref	0.1569	0.0829	0.0585	0.02	524845				0				0				0				0	-0.31072	0.190404	0.102702	0.02	21557	0.00221	0.717189	0.997541	0.02	467	-0.33149	0.291717	0.255814	0.01	4441					0					0	0.165107	0.478917	0.730281
DQA1_88_Ref	0.0128	0.0317	0.687	0.87	524845				0				0				0				0	0.012702	0.058372	0.827731	0.81	21354	0.28749	0.22463	0.200602	0.76	470	0.077172	0.088326	0.382271	0.85	4527	-0.8662	0.308457	0.004983	0.83	379					0	0.101151	0.156312	0.517559
DRB1_86_V	-0.037	0.0238	0.1194	0.71	524845				0				0				0				0	0.050598	0.048346	0.295293	0.69	21557	0.030274	0.203932	0.881985	0.66	467	0.00541	0.063954	0.932588	0.61	4441	0.385067	0.23378	0.099531	0.67	377					0	-0.04818	0.1006	0.631958
DRB1_60_Ref	-0.0215	0.0566	0.7034	0.96	524845				0				0				0				0	0.013573	0.061591	0.825584	0.83	21557	-0.62851	0.33339	0.0594	0.9	467	0.030823	0.081619	0.705699	0.83	4441	-0.09748	0.287512	0.734564	0.83	377					0	-0.22785	0.199789	0.254104
DQB1_82_Ref	-0.0524	0.08	0.5124	0.98	524845				0				0				0				0	0.013208	0.184329	0.942878	0.98	15320	0.746609	0.716817	0.297615	0.98	471	-0.08667	0.144862	0.549656	0.95	4511	0.236295	0.569289	0.67809	0.96	379					0	0.223916	0.241386	0.353603
DQB1_12_Ref	-0.0524	0.08	0.5124	0.98	524845				0				0				0				0	0.013208	0.184329	0.942878	0.98	15320	0.746609	0.716817	0.297615	0.98	471	-0.08667	0.144862	0.549656	0.95	4511	0.236295	0.569289	0.67809	0.96	379					0	0.223916	0.241386	0.353603
DQB1_10_Ref	-0.0524	0.08	0.5124	0.98	524845				0				0				0				0	0.013208	0.184329	0.942878	0.98	15320	0.746609	0.716817	0.297615	0.98	471	-0.08667	0.144862	0.549656	0.95	4511	0.236295	0.569289	0.67809	0.96	379					0	0.223916	0.241386	0.353603
DQB1_91_Ref	-0.0524	0.08	0.5124	0.98	524845				0				0				0				0	0.013208	0.184329	0.942878	0.98	15320	0.746609	0.716817	0.297615	0.98	471	-0.08667	0.144862	0.549656	0.95	4511	0.236295	0.569289	0.67809	0.96	379					0	0.223916	0.241386	0.353603
DQB1_92_Ref	-0.0524	0.08	0.5124	0.98	524845				0				0				0				0	0.013208	0.184329	0.942878	0.98	15320	0.746609	0.716817	0.297615	0.98	471	-0.08667	0.144862	0.549656	0.95	4511	0.236295	0.569289	0.67809	0.96	379					0	0.223916	0.241386	0.353603
DQB1_93_Ref	-0.0524	0.08	0.5124	0.98	524845				0				0				0				0	0.013208	0.184329	0.942878	0.98	15320	0.746609	0.716817	0.297615	0.98	471	-0.08667	0.144862	0.549656	0.95	4511	0.236295	0.569289	0.67809	0.96	379					0	0.223916	0.241386	0.353603
DQB1_88_Ref	-0.0524	0.08	0.5124	0.98	524845				0				0				0				0	0.013208	0.184329	0.942878	0.98	15320	0.746609	0.716817	0.297615	0.98	471	-0.08667	0.144862	0.549656	0.95	4511	0.236295	0.569289	0.67809	0.96	379					0	0.223916	0.241386	0.353603
DQB1_81_Ref	-0.0524	0.08	0.5124	0.98	524845				0				0				0				0	0.013208	0.184329	0.942878	0.98	15320	0.746609	0.716817	0.297615	0.98	471	-0.08667	0.144862	0.549656	0.95	4511	0.236295	0.569289	0.67809	0.96	379					0	0.223916	0.241386	0.353603
DQB1_11_Ref	-0.0524	0.08	0.5124	0.98	524845				0				0				0				0	0.013208	0.184329	0.942878	0.98	15320	0.746609	0.716817	0.297615	0.98	471	-0.08667	0.144862	0.549656	0.95	4511	0.236295	0.569289	0.67809	0.96	379					0	0.223916	0.241386	0.353603
DQB1_83_Ref	-0.0524	0.08	0.5124	0.98	524845				0				0				0				0	0.013208	0.184329	0.942878	0.98	15320	0.746609	0.716817	0.297615	0.98	471	-0.08667	0.144862	0.549656	0.95	4511	0.236295	0.569289	0.67809	0.96	379					0	0.223916	0.241386	0.353603
DRB1_57_A	0.0176	0.049	0.7188	0.05	524845				0				0				0				0					0					0					0	0.677513	0.878915	0.440795	0.02	377					0
DRB1_60_H	0.0176	0.049	0.7188	0.05	524845				0				0				0				0					0					0					0	0.677513	0.878915	0.440795	0.02	377					0
DQB1_26_L	-0.0432	0.0251	0.08449	0.76	524845				0				0				0				0	0.051119	0.058116	0.379075	0.69	15320	0.305771	0.198484	0.123431	0.62	471	0.060704	0.063869	0.341885	0.62	4511	0.272002	0.219944	0.216203	0.55	379					0	0.128447	0.105111	0.221704
DQB1_66_D	0.0193	0.023	0.4013	0.3	524845				0				0				0				0	0.071364	0.053078	0.178781	0.51	15320	-0.11459	0.193155	0.553001	0.53	471	-0.04438	0.063445	0.484226	0.39	4511	0.300099	0.219665	0.171886	0.44	379					0	-0.07718	0.100469	0.442387
DQB1_67_I	0.0193	0.023	0.4013	0.3	524845				0				0				0				0	0.071364	0.053078	0.178781	0.51	15320	-0.11459	0.193155	0.553001	0.53	471	-0.04438	0.063445	0.484226	0.39	4511	0.300099	0.219665	0.171886	0.44	379					0	-0.07718	0.100469	0.442387
DRB1_47_Ref	0.0304	0.0258	0.2385	0.77	524845				0				0				0				0	-0.01215	0.050011	0.808017	0.72	21557	0.077057	0.215291	0.720402	0.71	467	0.035224	0.07401	0.634124	0.77	4441	-0.25096	0.255828	0.326614	0.76	377					0	-0.25632	0.131886	0.051956
DRB1_11_S	0.0116	0.0226	0.6059	0.63	524845				0				0				0				0	-0.00438	0.049446	0.929492	0.7	21557	-0.23822	0.214354	0.266419	0.71	467	0.023403	0.065298	0.72004	0.65	4441	0.510158	0.238624	0.032523	0.7	377					0	-0.07097	0.104093	0.495379
DRB1_10_Y	0.0116	0.0226	0.6059	0.63	524845				0				0				0				0	-0.00438	0.049446	0.929492	0.7	21557	-0.23822	0.214354	0.266419	0.71	467	0.023403	0.065298	0.72004	0.65	4441	0.510158	0.238624	0.032523	0.7	377					0	-0.07097	0.104093	0.495379
DRB1_12_T	0.0116	0.0226	0.6059	0.63	524845				0				0				0				0	-0.00438	0.049446	0.929492	0.7	21557	-0.23822	0.214354	0.266419	0.71	467	0.023403	0.065298	0.72004	0.65	4441	0.510158	0.238624	0.032523	0.7	377					0	-0.07097	0.104093	0.495379
DRB1_40_Ref	0.1021	1.5223	0.9465	1	524845				0				0				0				0	0.470443	0.597512	0.431085	1	21557	-1.16479	1.16712	0.318276	0.99	467	-0.62184	0.551263	0.259309	1	4441	-0.43194	1.26409	0.732575	0.99	377					0	0.090142	0.875531	0.917997
DQB1_8_Ref	-0.0163	0.0329	0.62	0.87	524845				0				0				0				0	0.053176	0.066393	0.423169	0.79	15320	0.283992	0.224289	0.205446	0.75	471	0.107483	0.069503	0.121996	0.72	4511	0.313161	0.230924	0.17506	0.67	379					0	0.019532	0.14251	0.890988
DQB1_6_Ref	-0.0163	0.0329	0.62	0.87	524845				0				0				0				0	0.053176	0.066393	0.423169	0.79	15320	0.283992	0.224289	0.205446	0.75	471	0.107483	0.069503	0.121996	0.72	4511	0.313161	0.230924	0.17506	0.67	379					0	0.019532	0.14251	0.890988
DQB1_7_Ref	-0.0163	0.0329	0.62	0.87	524845				0				0				0				0	0.053176	0.066393	0.423169	0.79	15320	0.283992	0.224289	0.205446	0.75	471	0.107483	0.069503	0.121996	0.72	4511	0.313161	0.230924	0.17506	0.67	379					0	0.019532	0.14251	0.890988
DRB1_58_Ref	-0.0786	0.1531	0.6076	0.99	524845				0				0				0				0	-0.05608	0.185056	0.761838	0.99	21557	0.100633	0.68471	0.883154	0.98	467	0.091571	0.281548	0.744998	0.99	4441	1.38699	1.17745	0.238812	0.99	377					0	-1.28727	1.05723	0.22338
DQB1_23_L					0				0				0				0				0	-0.01421	0.078648	0.856571	0.13	15320	-0.23649	0.271338	0.383434	0.14	471	0.007079	0.105872	0.94669	0.1	4511	0.266122	0.385747	0.490266	0.09	379					0	-0.11102	0.12703	0.382138
DRB1_94_Ref	-0.0173	0.0311	0.5777	0.86	524845				0				0				0				0	-0.01777	0.06448	0.782829	0.85	21557	-0.10012	0.303386	0.741387	0.88	467	-0.02216	0.081316	0.785269	0.82	4441	0.304919	0.276423	0.269989	0.81	377					0	-0.2725	0.151937	0.072887
DRB1_71_E	-0.0304	0.0259	0.2403	0.23	524845				0				0				0				0	0.105431	0.095679	0.270495	0.05	21557	0.245807	0.389307	0.527781	0.07	467	0.090643	0.118404	0.443954	0.07	4441	-0.62183	0.546451	0.255149	0.04	377					0	0.101355	0.122171	0.406756
DQA1_51_Ref	0.0059	0.0301	0.8441	0.86	524845				0				0				0				0	0.052677	0.056955	0.355021	0.8	21354	0.265587	0.219225	0.225711	0.74	470	0.039989	0.082806	0.629147	0.83	4527	-0.5154	0.281829	0.067436	0.81	379					0	0.081478	0.143048	0.568961
DQA1_40_Ref	0.0059	0.0301	0.8441	0.86	524845				0				0				0				0	0.052677	0.056955	0.355021	0.8	21354	0.265587	0.219225	0.225711	0.74	470	0.039989	0.082806	0.629147	0.83	4527	-0.5154	0.281829	0.067436	0.81	379					0	0.081478	0.143048	0.568961
DQB1_56_L	0.0926	0.0495	0.06107	0.05	524845				0				0				0				0	-0.01182	0.074986	0.8747	0.14	15320	-0.24954	0.257405	0.332318	0.16	471	-0.04179	0.099647	0.674964	0.11	4511	0.327992	0.36816	0.372986	0.1	379					0	-0.07546	0.122205	0.536908
DRB1_13_G	0.0947	0.0395	0.01659	0.08	524845				0				0				0				0	-0.05018	0.044934	0.264064	0.45	21557	0.085335	0.198452	0.667195	0.38	467	-0.17909	0.064637	0.005595	0.37	4441	0.249432	0.221877	0.260933	0.43	377					0	-0.05839	0.106952	0.585081
DRB1_16_Y	0.0947	0.0395	0.01659	0.08	524845				0				0				0				0	-0.05018	0.044934	0.264064	0.45	21557	0.085335	0.198452	0.667195	0.38	467	-0.17909	0.064637	0.005595	0.37	4441	0.249432	0.221877	0.260933	0.43	377					0	-0.05839	0.106952	0.585081
DQA1_69_T	0.1146	0.0477	0.01638	0.05	524845				0				0				0				0	-0.05312	0.05412	0.326365	0.25	21354	-0.03079	0.258416	0.905159	0.17	470	-0.10943	0.077586	0.158395	0.2	4527	0.22223	0.252331	0.378477	0.26	379					0	0.12857	0.163025	0.430316
DRB1_70_D	0.0392	0.0229	0.08689	0.64	524845				0				0				0				0	-0.12586	0.046772	0.007124	0.67	21557	0.07683	0.200885	0.702122	0.65	467	-0.01211	0.066265	0.855032	0.67	4441	-0.0916	0.234249	0.695781	0.68	377					0	0.020048	0.105594	0.849416
DQA1_54_Ref	0.0005	0.031	0.9867	0.86	524845				0				0				0				0	-0.05887	0.092165	0.522988	0.94	21354	-0.01748	0.313437	0.955539	0.9	470	-0.19289	0.11581	0.095797	0.92	4527	-0.09384	0.434179	0.828887	0.93	379					0	0.209341	0.152597	0.170107
DRB1_32_H	-0.0166	0.0216	0.4434	0.5	524845				0				0				0				0	0.047715	0.044732	0.286114	0.53	21557	-0.0857	0.193951	0.658592	0.56	467	0.04206	0.062467	0.500747	0.47	4441	0.66261	0.222326	0.002879	0.54	377					0	-0.09297	0.100165	0.35331
DQB1_87_F	-0.0112	0.0222	0.6132	0.35	524845				0				0				0				0	0.046068	0.155486	0.767012	0.03	15320	0.158144	0.347688	0.649221	0.09	471	0.125187	0.089603	0.162377	0.14	4511	-0.22581	0.411159	0.582861	0.08	379					0	0.188524	0.122538	0.123928
DQB1_86_G	-0.0273	0.0378	0.4692	0.08	524845				0				0				0				0	0.038808	0.111777	0.72845	0.05	15320	0.137298	0.432326	0.750804	0.05	471	0.065828	0.14222	0.643466	0.05	4511	-1.03844	0.717368	0.147737	0.03	379					0	0.06994	0.143713	0.626495
DQA1_34_Ref	0.0133	0.0214	0.5356	0.58	524845				0				0				0				0	-0.04856	0.045214	0.28278	0.51	21354	0.405169	0.197344	0.040062	0.41	470	0.047135	0.062058	0.447532	0.53	4527	0.195058	0.217661	0.370171	0.5	379					0	-0.03409	0.099126	0.730931
DRB1_57_S	0.0689	0.04	0.08522	0.08	524845	-0.02969	0.037423	0.427588	308518	-0.04177	0.055833	0.454401	32760	0.071297	0.100907	0.479835	33404	-0.00714	0.057833	0.901793	573859	0.027191	0.050222	0.588218	0.26	21557	0.094018	0.210659	0.655378	0.29	467	-0.11912	0.072348	0.099654	0.24	4441	-0.01512	0.255981	0.952893	0.24	377	-0.03236	0.058633	0.580994	0.5	3509	-0.131	0.106535	0.218824
DQB1_23_Ref				0				0				0				0				0	0.555431	0.393155	0.157729	0.99	15320	-0.6291	1.2332	0.609956	0.99	471	-0.21313	0.309355	0.490853	0.99	4511	13.317	535.411	0.980157	1	379					0	0.020618	0.3043	0.945979	0.97
DRB1_10_Ref	-0.0112	0.0299	0.7067	0.84	524845				0				0				0				0	0.016815	0.050712	0.740208	0.74	21557	0.03727	0.210492	0.85946	0.71	467	0.137196	0.07456	0.065756	0.77	4441	0.09143	0.254503	0.719407	0.76	377					0	-0.04379	0.122937	0.721668
DRB1_74_L	0.112	0.0488	0.02175	0.05	524845				0				0				0				0	-0.02134	0.060056	0.722341	0.16	21557	0.275139	0.263693	0.296761	0.15	467	-0.26634	0.088364	0.002578	0.15	4441	-0.10694	0.317314	0.736098	0.14	377					0	-0.10244	0.129485	0.428873
DRB1_77_Ref	0.0122	0.0901	0.8921	0.98	524845				0				0				0				0	0.073968	0.183436	0.686776	0.98	21557	0.35101	0.654038	0.591488	0.98	467	-0.63203	0.317257	0.046353	0.99	4441	-15.4411	639.675	0.980742	0.99	377					0	-13.5157	358.585	0.969934
DRB1_16_Q				0				0				0				0				0	0.132176	0.148942	0.374846	0.02	21557	-0.61826	0.450849	0.170272	0.05	467	0.083752	0.157883	0.595788	0.04	4441	0.810701	0.558294	0.146472	0.05	377					0	-0.43831	0.199894	0.028329	0.06
DRB1_85_A	0.0794	0.0482	0.0993	0.05	524845				0				0				0				0	-0.06579	0.048818	0.1778	0.32	21557	-0.00577	0.227083	0.979732	0.24	467	-0.0687	0.072275	0.341836	0.25	4441	0.279311	0.239733	0.243982	0.31	377					0	-0.07225	0.133512	0.588401
DQA1_25_F	0.0272	0.0217	0.2102	0.37	524845				0				0				0				0	-0.0689	0.046769	0.140685	0.39	21354	0.180638	0.209519	0.388603	0.31	470	-0.11711	0.063212	0.063939	0.4	4527	0.062754	0.220491	0.775945	0.43	379					0	-0.09284	0.102516	0.36513
DQB1_70_E	0.0731	0.0484	0.1309	0.05	524845				0				0				0				0	-0.01182	0.074986	0.8747	0.14	15320	-0.24954	0.257405	0.332318	0.16	471	-0.04179	0.099647	0.674964	0.11	4511	0.327992	0.36816	0.372986	0.1	379					0	-0.07546	0.122205	0.536908
DQB1_71_D	0.0731	0.0484	0.1309	0.05	524845				0				0				0				0	-0.01182	0.074986	0.8747	0.14	15320	-0.24954	0.257405	0.332318	0.16	471	-0.04179	0.099647	0.674964	0.11	4511	0.327992	0.36816	0.372986	0.1	379					0	-0.07546	0.122205	0.536908
DQA1_75_Ref	0.0172	0.0318	0.5899	0.87	524845				0				0				0				0	-0.04464	0.072176	0.53627	0.9	21354	0.189927	0.252459	0.451865	0.83	470	-0.2097	0.110316	0.057317	0.91	4527	-0.44604	0.370365	0.228459	0.9	379					0	0.233883	0.161834	0.148399
DRB1_10_E	-0.0574	0.0903	0.525	0.02	524845				0				0				0				0	0.1949	0.122341	0.111142	0.03	21557	1.02382	0.603416	0.089753	0.04	467	0.024007	0.188135	0.898459	0.03	4441	-0.39639	0.627489	0.527577	0.03	377					0	-0.45837	0.253804	0.070921
DRB1_38_A	-0.0574	0.0903	0.525	0.02	524845				0				0				0				0	0.1949	0.122341	0.111142	0.03	21557	1.02382	0.603416	0.089753	0.04	467	0.024007	0.188135	0.898459	0.03	4441	-0.39639	0.627489	0.527577	0.03	377					0	-0.45837	0.253804	0.070921
DRB1_31_V	-0.0574	0.0903	0.525	0.02	524845				0				0				0				0	0.1949	0.122341	0.111142	0.03	21557	1.02382	0.603416	0.089753	0.04	467	0.024007	0.188135	0.898459	0.03	4441	-0.39639	0.627489	0.527577	0.03	377					0	-0.45837	0.253804	0.070921
DRB1_30_R	-0.0574	0.0903	0.525	0.02	524845				0				0				0				0	0.1949	0.122341	0.111142	0.03	21557	1.02382	0.603416	0.089753	0.04	467	0.024007	0.188135	0.898459	0.03	4441	-0.39639	0.627489	0.527577	0.03	377					0	-0.45837	0.253804	0.070921
DRB1_40_Y	-0.0574	0.0903	0.525	0.02	524845				0				0				0				0	0.1949	0.122341	0.111142	0.03	21557	1.02382	0.603416	0.089753	0.04	467	0.024007	0.188135	0.898459	0.03	4441	-0.39639	0.627489	0.527577	0.03	377					0	-0.45837	0.253804	0.070921
DQB1_57_D	0.0005	0.0239	0.9835	0.74	524845				0				0				0				0	-0.03457	0.08268	0.675872	0.89	15320	0.290406	0.271665	0.285076	0.85	471	-0.14836	0.105698	0.160436	0.91	4511	0.341903	0.372959	0.359285	0.91	379					0	-0.11723	0.143603	0.41429
DRB1_12_Ref	-0.0165	0.0304	0.5869	0.85	524845				0				0				0				0	0.022695	0.051786	0.661211	0.76	21557	0.140031	0.21496	0.514769	0.72	467	0.159104	0.076271	0.036974	0.78	4441	-0.02994	0.262334	0.909134	0.77	377					0	-0.14302	0.128363	0.265194
DQB1_45_Ref	-0.01	0.0377	0.7912	0.91	524845				0				0				0				0	0.035119	0.103182	0.733582	0.92	15320	0.136905	0.418033	0.743292	0.94	471	0.136498	0.118263	0.248424	0.93	4511	0.192807	0.390974	0.62191	0.92	379					0	-0.12977	0.255276	0.611206
[truncated: 21 more columns]
