# Supplementary material for: Protective association of HLA-DRB1*04 subtypes in neurodegenerative diseases implicates acetylated tau PHF6 sequences
Source: Research Square preprint supplement (doi:10.21203/rs.3.rs-1285855/v1), 2022-05-09
Supplement: Supplementary file 4 [file b2cde5c601bd2a14cd333ccc.xlsx]

## Sheet: alleles
HLA	N_US_European	Freq_EUR_ADGC	BETA_EUR_ADGC	SE_EUR_ADGC	P_EUR_ADGC	N_US_European_WGS	Freq_EUR_ADSP	BETA_EUR_ADSP	SE_EUR_ADSP	P_EUR_ADSP	N_UKB_British	Freq_British_UKB	BETA_British_UKB	SE_British_UKB	P_British_UKB	N_UKB_Others	Freq_Others_UKB	BETA_Others_UKB	SE_Others_UKB	P_Others_UKB	N_EADB	Freq_EUR_EADB_Bellenguez2021	BETA_EUR_EADB_Bellenguez2021	SE_EUR_EADB_Bellenguez2021	P_EUR_EADB_Bellenguez2021	N_US_Latino	Freq_AMR/Lat_ADGC	BETA_AMR/Lat_ADGC	SE_AMR/Lat_ADGC	P_AMR/Lat_ADGC	N_US_Latino_WGS	Freq_AMR/Lat_ADSP	BETA_AMR/Lat_ADSP	SE_AMR/Lat_ADSP	P_AMR/Lat_ADSP	N_US_African	Freq_AFR_ADGC	BETA_AFR_ADGC	SE_AFR_ADGC	P_AFR_ADGC	N_US_African_WGS	Freq_AFR_ADSP	BETA_AFR_ADSP	SE_AFR_ADSP	P_AFR_ADSP	N_Japan_NCGG	Freq_Japan_NCGG	BETA_Japan_NCGG	SE_Japan_NCGG
DQB1*03:02	24429	0.19	-0.140481	0.0331165	2.21523e-05	7118	0.19	-0.134062	0.06213	0.0309462	324734	0.2	-0.126661	0.0247378	3.05243e-07	62464	0.16	-0.0957667	0.0667222	0.151201	75703	0.19	-0.1197	0.0213	1.758e-08	2003	0.29	-0.031931	0.114669	0.780657	1541	0.25	-0.315839	0.16209	0.0513498	1692	0.05	-0.0496022	0.327551	0.879634	1883	0.07	-0.239199	0.185503	0.197238	6070	0.17	-0.0162212	0.0690837
DQA1*03:01	23870	0.18	-0.153575	0.0344546	8.29968e-06	7142	0.32	-0.146	0.0522824	0.00522981	324431	0.19	-0.119971	0.025016	1.62037e-06	62210	0.16	-0.0861303	0.0677654	0.203722	75703	0.18	-0.1206	0.0217	2.643e-08	1951	0.28	0.0606838	0.119006	0.610106	1459	0.23	-0.238476	0.170311	0.161442	0					1902	0.02	-0.197873	0.315495	0.53054	6065	0.16	0.0347858	0.0711779
DRB1*04:04	23316	0.06	-0.189232	0.0562647	0.000770297	6353	0.06	-0.233998	0.110854	0.0347842	311123	0.08	-0.138764	0.0371518	0.000187644	56851	0.06	-0.114129	0.110287	0.300744	75703	0.06	-0.1504	0.0372	5.312e-05	1140	0.01	-0.72851	0.598285	0.223351	0					0					1750	0.01	-0.141589	0.478331	0.767226	0
DQB1*05:01	24429	0.23	0.0692713	0.0304458	0.0228919	7118	0.24	0.112847	0.0571132	0.0481714	324734	0.23	0.0573887	0.023095	0.0129497	62464	0.22	0.0474721	0.0593398	0.423615	75703	0.24	0.0783	0.0191	4.064e-05	2003	0.23	-0.0272262	0.118576	0.818394	1541	0.28	0.192116	0.151901	0.205962	1692	0.25	-0.0418634	0.170324	0.805848	1883	0.31	0.0449524	0.101956	0.659285	6070	0.11	0.0779963	0.0826519
DRB1*01:01	23316	0.19	0.0187172	0.0342241	0.584446	6353	0.2	0.145485	0.0655467	0.026449	311123	0.2	0.0586904	0.0248494	0.0181736	56851	0.13	0.121268	0.0732842	0.0979746	75703	0.2	0.0898	0.0212	2.354e-05	1140	0.11	0.0381214	0.202784	0.850885	918	0.12	-0.039371	0.266845	0.882704	1737	0.04	0.385348	0.385852	0.317944	1750	0.05	-0.0943032	0.231508	0.683755	5927	0.1	0.0735991	0.0856099
DQA1*01:01	23870	0.22	0.0504976	0.0315319	0.109272	7142	0.28	0.0443045	0.054008	0.412027	324431	0.22	0.0597195	0.0235252	0.0111417	62210	0.17	0.0838955	0.0635076	0.186494	75703	0.22	0.0772	0.0197	8.85e-05	1951	0.17	-0.0126134	0.133963	0.924985	1459	0.2	0.19925	0.173123	0.249767	1809	0.1	0.348236	0.241138	0.148702	1902	0.14	-0.100418	0.136945	0.463392	6065	0.1	0.0839844	0.0852556
DRB1*04:01	23316	0.15	-0.062346	0.0369639	0.0916667	6353	0.17	-0.112686	0.0697531	0.106201	311123	0.22	-0.0709311	0.0240718	0.00321235	56851	0.12	-0.110632	0.0767256	0.149325	75703	0.16	-0.0584	0.0238	0.01438	1140	0.02	-0.600331	0.507527	0.236867	918	0.03	-0.472287	0.622432	0.447986	1737	0.01	-0.162107	0.569284	0.775831	1750	0.02	-0.703022	0.340127	0.0387399	5927	0.02	-0.523209	0.182112
DQB1*03:03	24429	0.09	0.0828445	0.0451083	0.0662739	7118	0.09	-0.116029	0.0867642	0.181128	324734	0.1	0.0641017	0.0318314	0.0440463	62464	0.09	0.183973	0.0846382	0.0297281	75703	0.09	0.0783	0.0289	0.0067	2003	0.04	0.10286	0.268344	0.701485	1541	0.03	-0.273221	0.440837	0.535404	1692	0.01	0.785406	0.559935	0.160714	1883	0.03	0.465488	0.266969	0.081228	6070	0.29	-0.0230198	0.0596376
DRB1*11:01	23316	0.13	0.0255441	0.0398575	0.521596	6353	0.13	-0.0773284	0.0764199	0.311591	311123	0.09	0.128614	0.0343718	0.000182502	56851	0.13	0.0849692	0.0796048	0.285834	75703	0.14	0.0178	0.0247	0.4709	1140	0.02	0.50529	0.436695	0.24724	918	0.02	0.474905	0.584982	0.41689	1737	0.15	-0.224448	0.21267	0.29125	1750	0.17	0.276408	0.1315	0.0355576	5927	0.06	0.201422	0.115057
DRB1*04:07	23316	0.01	-0.0207895	0.109957	0.850038	6353	0.01	-0.120168	0.233672	0.607071	311123	0.02	-0.135477	0.0686638	0.0484906	56851	0.01	-0.160755	0.22264	0.470272	75139	0.01	-0.1393	0.0778	0.07317	1140	0.08	-0.283219	0.268223	0.291009	918	0.04	-0.356143	0.451556	0.430286	0					0					0
DQA1*02:01	23870	0.22	0.0732396	0.0315336	0.0202014	7142	0.24	0.0715079	0.0566885	0.207158	324431	0.27	0.0218205	0.0218402	0.317666	62210	0.25	0.132998	0.0561694	0.0178891	75703	0.24	0.0296	0.0193	0.1247	1951	0.23	-0.208768	0.119112	0.0796541	1459	0.27	0.0528139	0.158741	0.739357	1809	0.21	-0.0871729	0.180206	0.62857	1902	0.21	-0.305013	0.115584	0.00831797	0
DRB1*13:01	23316	0.12	-0.102201	0.0399341	0.0104903	6353	0.12	-0.0162785	0.0803491	0.83945	311123	0.1	0.0118051	0.032776	0.718654	56851	0.11	-0.116286	0.0845208	0.168872	75703	0.14	-0.0427	0.0244	0.08062	1140	0.12	-0.0996572	0.19686	0.612692	918	0.18	0.522481	0.229609	0.0228746	1737	0.1	-0.120468	0.245413	0.623512	1750	0.11	0.189184	0.155861	0.224824	5927	0.01	-0.614031	0.248272
DQA1*03:03	23870	0.13	-0.00645874	0.0391119	0.868838	5251	0.15	0.00390262	0.079691	0.960942	324431	0.18	-0.0654142	0.0257162	0.010968	62210	0.12	-0.107272	0.0762854	0.159663	75703	0.11	-0.0199	0.0263	0.4497	1951	0.06	-0.256743	0.210837	0.223326	1459	0.07	0.0477301	0.288047	0.868391	1809	0.13	0.0107952	0.215251	0.960002	1902	0.16	0.0923241	0.127613	0.469392	6065	0.29	0.103444	0.0592713
DQB1*06:03	24429	0.12	-0.0844538	0.038874	0.029818	7118	0.11	0.0301432	0.0769625	0.695309	324734	0.1	0.0134546	0.0325236	0.679127	62464	0.1	-0.106101	0.082469	0.198249	75703	0.13	-0.0395	0.024	0.1002	2003	0.09	0.00894868	0.172318	0.958584	1541	0.13	0.402341	0.202659	0.0471101	1692	0.06	-0.11715	0.317021	0.711731	1883	0.04	0.185427	0.254542	0.466324	6070	0.01	-0.572272	0.24504
DRB1*14:02	0					0					0					0					0					1140	0.03	0.959096	0.401692	0.0169568	918	0.02	-0.422243	0.716332	0.555558	0					0					0
DQA1*05:03	0					0					0					0					0					1951	0.08	0.377725	0.215126	0.0791176	1459	0.02	0.227784	0.478325	0.633924	0					0					6065	0.03	0.174166	0.148266
DQA1*01:03	23870	0.14	-0.10074	0.0373501	0.00699283	7142	0.13	0.0346987	0.0733059	0.63597	324431	0.11	0.0216029	0.0314152	0.491654	62210	0.15	-0.039218	0.0729508	0.590855	75703	0.14	-0.039	0.0232	0.09261	1951	0.12	0.0338036	0.151369	0.823287	1459	0.17	0.317885	0.185538	0.0866555	1809	0.07	-0.381863	0.281049	0.17424	1902	0.07	0.223168	0.188576	0.236635	6065	0.34	-0.0154364	0.071083
DQA1*05:05	23870	0.25	0.0294821	0.0310644	0.342587	5251	0.28	-0.0234357	0.0642094	0.71512	324431	0.17	0.0446772	0.0259868	0.0855527	62210	0.22	0.0740135	0.0611646	0.226296	75703	0.26	0.0046	0.0194	0.8117	1951	0.3	-0.0953332	0.111221	0.391361	1459	0.25	-0.0650107	0.160075	0.68465	1809	0.21	0.184954	0.180734	0.306143	1902	0.24	0.0619712	0.109582	0.571718	6065	0.09	0.0837985	0.091383
DQA1*03:02	23870	0.02	0.212051	0.0986809	0.0316458	0					324431	0.03	0.00399601	0.0608848	0.947796	62210	0.02	0.100454	0.174352	0.564502	75703	0.02	0.0441	0.0538	0.4123	0					0					0					0					6065	0.29	-0.0241426	0.0596764
DRB1*11:04	23316	0.04	0.10688	0.0714264	0.13456	6353	0.03	0.0836031	0.161424	0.604522	311123	0.01	0.00949741	0.0844414	0.910386	56851	0.04	0.107612	0.137665	0.434397	75703	0.04	0.0304	0.0461	0.5086	1140	0.03	0.0674446	0.410525	0.869504	918	0.01	-0.0163428	0.841146	0.984499	1737	0.04	0.230629	0.450742	0.608885	0					0
DRB1*04:10	0					0					0					0					0					1140	0.01	0.164991	0.588782	0.779305	918	0.01	-0.250556	0.779111	0.747762	0					0					5927	0.04	0.219813	0.138787
DRB1*15:01	23316	0.26	0.0352332	0.0308202	0.252962	6353	0.27	-0.0357974	0.0590633	0.544458	311123	0.28	0.0301516	0.0221112	0.172627	56851	0.23	0.0994081	0.0609228	0.102755	75703	0.25	0.0107	0.0197	0.5881	1140	0.16	0.0847087	0.177121	0.632469	918	0.16	-0.34989	0.246823	0.156314	0					1750	0.04	-0.0795217	0.250313	0.750721	5927	0.14	-0.174084	0.0760371
DQB1*06:02	24429	0.24	0.0327327	0.0310617	0.291977	7118	0.24	-0.0347758	0.0578699	0.547887	324734	0.27	0.0360924	0.0218302	0.0983373	62464	0.22	0.10748	0.0596548	0.0715891	75703	0.23	0.0055	0.0195	0.7787	2003	0.15	0.0975317	0.13861	0.481658	1541	0.16	-0.187922	0.186728	0.314226	1692	0.4	0.102439	0.154385	0.50699	1883	0.36	-0.0427712	0.0979733	0.662431	6070	0.13	-0.172358	0.0758595
DRB1*09:01	23316	0.02	0.16496	0.092661	0.0750352	6353	0.02	-0.0837206	0.170041	0.622468	311123	0.03	0.00161934	0.0621706	0.979307	56851	0.03	-0.00847995	0.177225	0.96184	75703	0.02	0.0526	0.0567	0.3539	0					0					1737	0.05	-0.505479	0.332301	0.128223	1750	0.06	0.553077	0.202214	0.00623589	5927	0.28	-0.0296467	0.0611382
DRB1*12:02	0					0					0					56851	0.01	-0.180563	0.299138	0.546103	0					0					0					0					0					5927	0.04	-0.153517	0.140495
DQA1*06:01	0					0					0					62210	0.02	-0.225845	0.22241	0.309895	0					0					0					0					0					6065	0.04	-0.140916	0.13479
DRB1*07:01	23316	0.26	-0.0142054	0.0298658	0.634329	6353	0.26	0.0620681	0.0585193	0.288852	311123	0.28	0.0138916	0.0221046	0.529846	56851	0.27	0.125968	0.0574168	0.0282488	75703	0.25	0.0297	0.0197	0.1312	1140	0.31	-0.0715815	0.140113	0.609433	918	0.34	-0.0500738	0.184565	0.786155	1737	0.18	-0.0372842	0.191816	0.845882	1750	0.2	-0.355859	0.122368	0.00363641	0
DRB1*08:03	0					0					0					0					0					0					0					0					0					5927	0.16	0.0407073	0.0716354
DQB1*06:01	24429	0.02	0.138425	0.0985836	0.160278	7118	0.02	0.259502	0.182611	0.155298	0					62464	0.06	0.0867894	0.129037	0.501178	75139	0.01	-0.0166	0.074	0.822	2003	0.04	0.0834374	0.266354	0.754085	1541	0.03	-0.0343267	0.378924	0.927818	0					0					6070	0.33	0.0196835	0.0724871
DRB1*14:06	0					0					0					0					0					1140	0.06	0.190916	0.354969	0.590689	0					0					0					5927	0.03	0.169892	0.156957
DRB1*01:03	23316	0.01	0.343871	0.130897	0.00861304	0					311123	0.02	-0.0574225	0.0709138	0.418075	56851	0.01	-0.0361691	0.211468	0.864192	73327	0.01	-0.2546	0.0907	0.005012	0					0					0					0					0
DQA1*01:05	23870	0.02	0.0317074	0.0978036	0.74579	5251	0.02	0.174213	0.199095	0.381561	324431	0.01	-0.0291859	0.0926614	0.752775	62210	0.04	-0.28055	0.151476	0.0640086	75139	0.02	0.0901	0.0592	0.1278	0					1459	0.02	0.942659	0.602335	0.117581	1809	0.11	0.164281	0.235444	0.485335	1902	0.13	0.211147	0.140479	0.132826	6065	0.01
DRB1*03:02	0					0					0					56851	0.01	-0.048444	0.277606	0.861467	0					1140	0.03	0.872348	0.3764	0.0204705	918	0.03	0.292683	0.46439	0.52853	1737	0.18	0.0737892	0.210027	0.725339	1750	0.14	0.0515189	0.141912	0.71658	0
DRB1*14:03	0					0					0					0					0					0					0					0					0					5927	0.03	0.13078	0.150266
DQA1*05:08	0					0					0					0					0					0					0					0					0					6065	0.02	-0.26581	0.20539
DRB1*08:04	0					0					0					56851	0.01	0.022493	0.263348	0.931932	0					0					0					1737	0.15	-0.218332	0.229672	0.341795	1750	0.11	-0.118844	0.154131	0.440674	0
DRB1*04:03	0					0					0					0					0					0					0					0					0					5927	0.06	0.14543	0.107953
DRB1*08:09	0					0					0					0					0					0					0					0					0					0
DQA1*05:07	0					0					0					0					0					0					0					0					0					6065	0.03	0.124536	0.14825
DQA1*01:02	23870	0.37	0.0117021	0.0274205	0.669551	7142	0.35	-0.0159739	0.0513834	0.755895	324431	0.35	0.0203165	0.0203796	0.318719	62210	0.35	0.0237583	0.0526006	0.651483	75703	0.35	0.0076	0.017	0.6529	1951	0.29	0.127337	0.111672	0.254172	1459	0.32	-0.0492368	0.150549	0.74363	1809	0.55	-0.113814	0.148365	0.443007	1902	0.52	-0.023488	0.0938647	0.802408	6065	0.31	-0.135602	0.0679983
DRB1*14:01	23316	0.05	0.0967625	0.0628434	0.123624	6353	0.03	-0.208854	0.144933	0.149573	311123	0.04	0.0300531	0.0481664	0.532703	56851	0.06	0.00145947	0.115385	0.98993	75703	0.06	0.0089	0.0359	0.8048	1140	0.04	-0.320919	0.370379	0.386237	918	0.03	-0.0532103	0.520722	0.918609	0					0					0
DRB1*11:02	0					0					0					0					0					1140	0.01	-0.287752	0.555858	0.604687	918	0.03	0.279054	0.516914	0.589304	1737	0.07	0.248554	0.281784	0.377738	1750	0.07	0.0827684	0.194134	0.669856	0
DRB1*12:01	23316	0.03	-0.0241673	0.0732795	0.741554	6353	0.03	0.168692	0.140408	0.229581	311123	0.03	-0.0766502	0.0598308	0.200147	56851	0.03	-0.0451416	0.146974	0.75874	75703	0.03	-0.0179	0.0476	0.7069	1140	0.03	0.0574666	0.393164	0.883792	918	0.05	0.0183682	0.408237	0.964112	1737	0.06	0.340657	0.310951	0.273284	1750	0.08	0.241911	0.175658	0.168459	5927	0.06	-0.127265	0.107382
DQA1*05:01	23870	0.22	-0.0100664	0.0392954	0.797818	7142	0.44	-0.0294862	0.0490674	0.547885	324431	0.27	-0.00479174	0.021836	0.826271	62210	0.22	-0.0793411	0.0599136	0.18542	75703	0.22	-0.0011	0.0196	0.9558	1951	0.12	-0.224538	0.15423	0.145432	1459	0.15	-0.0261783	0.19608	0.893791	1809	0.14	0.357617	0.206924	0.0839427	1902	0.14	-0.0679785	0.136177	0.617643	0
DRB1*08:06	0					0					0					0					0					0					0					0					1750	0.01	-0.369153	0.47291	0.435038	0
DRB1*03:01	23316	0.23	0.00201551	0.0394585	0.959262	6353	0.24	-0.0439958	0.0608019	0.469316	311123	0.28	-0.00524487	0.0220352	0.81189	56851	0.24	-0.0885434	0.0607726	0.145131	75703	0.24	-0.0003	0.02	0.9869	1140	0.16	-0.262253	0.177562	0.139684	918	0.19	-0.227318	0.218845	0.298937	1737	0.14	0.287233	0.212755	0.176995	1750	0.14	-0.0901441	0.141456	0.523958	0
DQB1*04:01	0					0					0					0					0					0					0					0					0					6070	0.24	0.133553	0.0626232
DQB1*06:04	24429	0.06	-0.0273546	0.0521771	0.600095	7118	0.07	-0.102922	0.0977792	0.292526	324734	0.05	-0.0303329	0.042939	0.479939	62464	0.05	-0.0877826	0.116204	0.449998	75703	0.07	0.0078	0.0314	0.8049	2003	0.05	0.281874	0.234177	0.228714	1541	0.07	0.0299127	0.298069	0.920063	1692	0.02	-1.07115	0.527505	0.0422954	1883	0.03	-0.150073	0.282391	0.595116	6070	0.16	0.0271083	0.123577
DQB1*03:19	0					0					0					0					0					2003	0.02	-0.0131419	0.368103	0.97152	1541	0.03	-0.391595	0.391142	0.316751	0					0					0
DRB1*15:03	0					0					0					56851	0.02	0.0480775	0.248116	0.846368	0					1140	0.02	-0.392699	0.447896	0.380616	918	0.03	-0.752082	0.544937	0.167548	1737	0.32	0.0571818	0.165179	0.729207	1750	0.27	-0.081713	0.110461	0.459454	0
DRB1*13:04	0					0					0					0					0					0					0					0					1750	0.03	0.188499	0.280231	0.501165	0
DQB1*06:09	24429	0.02	-0.109239	0.0905294	0.22756	7118	0.02	0.10872	0.177429	0.54004	324734	0.02	0.12884	0.067711	0.0570515	62464	0.03	-0.0316369	0.146121	0.82859	75139	0.02	0.0466	0.0634	0.4622	2003	0.03	-0.0931229	0.29254	0.750238	1541	0.03	0.0349784	0.40037	0.930381	1692	0.05	-0.406171	0.322908	0.208445	1883	0.07	0.168974	0.188405	0.369791	6070	0.01	-0.411452	0.268799
DQB1*05:03	24429	0.05	-0.0120799	0.0578446	0.834578	7118	0.05	-0.147107	0.108525	0.175251	324734	0.04	0.0440904	0.0473958	0.352315	62464	0.06	-0.0729587	0.109742	0.506172	75703	0.06	0.0252	0.0346	0.4668	2003	0.03	-0.343695	0.311168	0.269362	1541	0.02	0.505568	0.442432	0.253162	1692	0.02	1.08815	0.484893	0.0248257	1883	0.03	0.0982486	0.28257	0.728068	6070	0.08	-0.0483953	0.0971855
DRB1*15:02	23316	0.02	0.193734	0.0995881	0.0517322	6353	0.02	0.329449	0.188795	0.0809831	0					56851	0.05	0.0341272	0.143476	0.812041	75139	0.01	-0.0174	0.0755	0.8173	1140	0.05	0.251419	0.292191	0.389535	918	0.04	-0.24121	0.439461	0.583089	0					0					5927	0.2	-0.0504003	0.130708
DRB1*04:06	0					0					0					0					0					0					0					0					0					5927	0.06	-0.00873481	0.113865
DRB1*04:05	23316	0.01	-0.0472345	0.131716	0.719888	0					0					56851	0.02	-0.0467072	0.219504	0.831492	75139	0.01	-0.0072	0.0755	0.9241	1140	0.03	-0.358365	0.347458	0.302357	918	0.04	-0.888006	0.482062	0.0654603	1737	0.02	-0.257637	0.565705	0.648803	1750	0.02	-0.56885	0.327456	0.0823556	5927	0.24	0.130084	0.0630016
DRB1*10:01	23316	0.02	0.0727466	0.0955276	0.446344	6353	0.02	0.175676	0.191734	0.359535	311123	0.01	-0.0451028	0.0928876	0.627272	56851	0.04	-0.267941	0.159764	0.0935217	75139	0.02	0.0633	0.0588	0.2822	1140	0.05	-0.293551	0.279596	0.293758	918	0.06	0.189619	0.371334	0.609602	1737	0.04	-0.340613	0.391026	0.383713	1750	0.04	0.169798	0.248017	0.493581	5927	0.01
DQB1*04:02	24429	0.05	-0.0568477	0.0575536	0.323282	7118	0.05	-0.0025354	0.109701	0.981561	324734	0.04	-0.0326958	0.049926	0.512544	62464	0.05	-0.150883	0.115908	0.193006	75703	0.07	0.0223	0.033	0.4989	2003	0.18	0.264698	0.135628	0.0509798	1541	0.17	-0.149416	0.186448	0.422911	1692	0.2	-0.0512147	0.200868	0.798748	1883	0.16	0.0946597	0.129026	0.463163	6070	0.08	0.178747	0.0962453
DRB1*01:02	23316	0.04	0.0960306	0.0731921	0.189509	6353	0.04	-0.0916285	0.134247	0.4949	311123	0.01	0.00983577	0.0819418	0.904531	56851	0.04	-0.0554702	0.13454	0.680127	75703	0.03	-0.0101	0.0544	0.8525	1140	0.1	-0.0338004	0.222506	0.87926	918	0.12	0.28662	0.2631	0.27598	1737	0.07	0.113618	0.291173	0.696382	1750	0.09	-0.0466254	0.173155	0.787722	0
DRB1*13:02	23316	0.09	-0.0344353	0.0455829	0.449982	6353	0.09	-0.00566759	0.0888336	0.949129	311123	0.08	0.0114869	0.0371908	0.757494	56851	0.09	-0.0867526	0.0934146	0.35305	75703	0.09	0.0051	0.0289	0.8602	1140	0.13	-0.0329899	0.191285	0.863072	918	0.16	0.14339	0.241981	0.553472	1737	0.1	-0.692419	0.245086	0.00472499	1750	0.12	0.0438426	0.148503	0.767817	5927	0.17	-0.0676834	0.119996
DQB1*02:01	24429	0.22	-0.0121628	0.0389356	0.75475	7118	0.39	0.0587759	0.0503055	0.242654	324734	0.27	-0.00697816	0.0218322	0.749218	62464	0.22	-0.0775108	0.0598318	0.19516	75703	0.22	-0.0001	0.0196	0.9954	2003	0.12	-0.268897	0.153902	0.0806028	1541	0.14	-0.075826	0.193582	0.69528	1692	0.14	0.309211	0.21148	0.143706	1883	0.14	-0.005252	0.137796	0.969597	0
DQA1*01:04	23870	0.05	-0.00292006	0.0582024	0.959986	5251	0.06	-0.17193	0.116984	0.141647	324431	0.04	0.0352279	0.0476066	0.45926	62210	0.06	-0.0374892	0.10945	0.731953	75703	0.06	0.0277	0.0347	0.4256	1951	0.03	-0.320627	0.330501	0.331984	1459	0.02	0.542343	0.49365	0.271925	0					1902	0.02	0.0584056	0.370758	0.874827	6065	0.11	-0.0363522	0.0835986
DRB1*08:02	0					0					0					0					0					1140	0.14	0.109493	0.218747	0.616692	918	0.07	-0.202131	0.365634	0.580385	0					0					5927	0.08	-0.022522	0.0991437
DRB1*16:01	23316	0.03	0.060841	0.0769323	0.429038	6353	0.02	0.274489	0.172969	0.112529	311123	0.01	0.0642373	0.0933968	0.491542	56851	0.03	-0.0634644	0.169319	0.707791	75703	0.05	-0.0427	0.0438	0.3297	1140	0.04	0.179355	0.338815	0.596556	918	0.03	0.488489	0.437783	0.264497	0					0					0
DQB1*02:02	24429	0.19	-0.0247639	0.0327033	0.448913	7091	0.19	0.144071	0.062616	0.0213995	324734	0.2	-0.0069019	0.0241846	0.775365	62464	0.2	0.0839914	0.0615038	0.172096	75703	0.18	0.0039	0.0213	0.8562	2003	0.21	-0.0544733	0.122143	0.655613	1541	0.25	0.139066	0.159493	0.38325	1692	0.28	-0.129976	0.166592	0.435269	1883	0.27	-0.141806	0.106009	0.181	0
DRB1*16:02	0					0					0					0					0					1140	0.04	0.300799	0.392439	0.443386	918	0.02	0.546373	0.586002	0.351143	1737	0.01	0.313366	0.720313	0.663532	1750	0.03	-0.00807031	0.302856	0.978741	5927	0.02	-0.0666433	0.180527
DRB1*13:03	23316	0.02	0.0216856	0.0913839	0.812422	6353	0.02	0.0185812	0.181675	0.918537	311123	0.02	0.102432	0.0752824	0.173626	56851	0.02	-0.0999504	0.175973	0.570047	75703	0.02	-0.0611	0.063	0.3322	1140	0.04	-0.0736808	0.343754	0.830281	918	0.05	-0.323821	0.437847	0.459557	1737	0.11	0.0710955	0.25172	0.777607	1750	0.07	-0.151247	0.190499	0.427222	0
DRB1*14:05	0					0					0					0					0					0					0					0					0					5927	0.04	-0.0517266	0.137969
DQA1*04:01	23870	0.05	-0.0282113	0.0595097	0.635455	7142	0.05	0.0199779	0.113341	0.860087	324431	0.04	-0.0247809	0.0507038	0.625023	62210	0.06	-0.0822816	0.117203	0.48265	75703	0.07	0.0171	0.0334	0.6081	1951	0.17	0.228906	0.143504	0.110685	1459	0.16	-0.227646	0.198482	0.251409	1809	0.28	-0.182501	0.176221	0.300371	1902	0.22	0.0443507	0.114201	0.697751	6065	0.05	-0.00477423	0.115591
DQB1*05:02	24429	0.04	0.0700451	0.0679355	0.302516	7118	0.03	0.335473	0.143891	0.0197304	324734	0.01	0.00505361	0.0844412	0.952277	62464	0.05	-0.113213	0.12817	0.377078	75703	0.06	-0.0342	0.0391	0.3829	2003	0.02	0.414493	0.317991	0.192413	1541	0.02	0.0973168	0.409661	0.812227	1692	0.08	-0.240424	0.284894	0.398721	1883	0.06	-0.031471	0.200224	0.875104	6070	0.05	0.0145143	0.115447
DRB1*14:54	0					6606	0.05	-0.0811162	0.116378	0.4858	0					0					0					0					0					1737	0.04	0.558223	0.389867	0.152193	1750	0.04	0.165771	0.258833	0.521877	5927	0.06	0.0305343	0.113216
DQB1*03:01	24429	0.35	0.0299877	0.0274501	0.274638	7118	0.35	-0.0197426	0.0511977	0.699781	324734	0.32	-0.00413627	0.0208074	0.842424	62464	0.33	-0.00773695	0.0529238	0.883779	75703	0.34	-0.0023	0.0174	0.8973	2003	0.38	-0.0306708	0.104167	0.768423	1541	0.27	-0.00880972	0.152449	0.953917	1692	0.12	0.299717	0.2253	0.183418	1883	0.14	-0.0437589	0.13405	0.744094	6070	0.22	-0.0202157	0.0634833
DRB1*08:01	23316	0.05	-0.0134796	0.0609813	0.825057	6353	0.05	-0.0366286	0.121208	0.762503	311123	0.04	-0.0365398	0.0524118	0.485701	56851	0.03	-0.134396	0.147642	0.362673	75703	0.06	0.0313	0.0359	0.384	1140	0.03	0.262684	0.402325	0.513812	918	0.03	-0.329869	0.581186	0.570321	0					0					0
DRB1*04:02	23316	0.03	-0.0743763	0.0845331	0.378941	6353	0.03	0.154855	0.169025	0.35958	0					56851	0.03	0.345535	0.154602	0.0254205	69326	0.01	-0.0531	0.0759	0.484	0					0					0					0					0
DRB1*14:04	0					0					0					0					0					0					0					0					0					5927	0.01
DQA1*05:06	0					0					0					0					0					0					0					0					0					0
[truncated: 25 more columns]

## Sheet: haplotypes
HLA	N_US_European	Freq_EUR_ADGC	BETA_EUR_ADGC	SE_EUR_ADGC	P_EUR_ADGC	N_US_European_WGS	Freq_EUR_ADSP	BETA_EUR_ADSP	SE_EUR_ADSP	P_EUR_ADSP	N_UKB_British	Freq_British_UKB	BETA_British_UKB	SE_British_UKB	P_British_UKB	N_UKB_Others	Freq_Others_UKB	BETA_Others_UKB	SE_Others_UKB	P_Others_UKB	N_EADB	Freq_EUR_EADB_Bellenguez2021	BETA_EUR_EADB_Bellenguez2021	SE_EUR_EADB_Bellenguez2021	P_EUR_EADB_Bellenguez2021	N_US_Latino	Freq_AMR/Lat_ADGC	BETA_AMR/Lat_ADGC	SE_AMR/Lat_ADGC	P_AMR/Lat_ADGC	N_US_Latino_WGS	Freq_AMR/Lat_ADSP	BETA_AMR/Lat_ADSP	SE_AMR/Lat_ADSP	P_AMR/Lat_ADSP	N_US_African	Freq_AFR_ADGC	BETA_AFR_ADGC	SE_AFR_ADGC	P_AFR_ADGC	N_US_African_WGS	Freq_AFR_ADSP	BETA_AFR_ADSP	SE_AFR_ADSP	P_AFR_ADSP	N_Japan_NCGG	Freq_Japan_NCGG	BETA_Japan_NCGG	SE_Japan_NCGG
DQA1*03:01~DQB1*03:02~DRB1*04:04	21331	0.06	-0.20821	0.058595	0.00038	6330	0.06	-0.21486	0.113358	0.058039	214958	0.1	-0.14381	0.040806	0.000425	35513	0.08	0.028457	0.121324	0.81451	63983	0.06	-0.1622	0.0391	3.32e-05	1024	0.01	-0.75281	0.597892	0.207989	0					0					1621	0.01	-0.08093	0.494283	0.869935	0
DQA1*01:01~DQB1*05:01~DRB1*01:01	21331	0.18	0.012534	0.036031	0.727937	6330	0.19	0.139263	0.066186	0.035369	214958	0.25	0.067488	0.027581	0.014404	35513	0.18	0.143748	0.08189	0.079209	63983	0.2	0.0956	0.0224	1.92e-05	1024	0.12	-0.02543	0.212036	0.904523	841	0.13	-0.03492	0.275396	0.899095	1526	0.04	0.454827	0.394937	0.249467	1621	0.05	-0.02249	0.241825	0.925917	0
DQA1*03:01~DQB1*03:02~DRB1*04:01	21331	0.07	-0.12759	0.054281	0.018744	6330	0.08	-0.15582	0.098825	0.114859	214958	0.1	-0.09912	0.040561	0.014542	35513	0.06	-0.29508	0.136644	0.030813	63983	0.09	-0.0717	0.0318	0.02416	0					0					0					0					0
DQA1*03:01~DQB1*03:02~DRB1*04:06	0					0					0					0					0					0					0					0					0					0
DQA1*03:03~DQB1*03:01~DRB1*04:07	21331	0.02	-0.04069	0.111572	0.715333	4759	0.01	0.112698	0.283324	0.690799	214958	0.02	-0.12942	0.088438	0.143344	35513	0.01	-0.39054	0.311732	0.210276	63504	0.01	-0.1955	0.0817	0.01675	0					0					0					0					0
DQA1*02:01~DQB1*03:03~DRB1*07:01	21331	0.06	0.133621	0.056493	0.018016	6330	0.07	-0.16209	0.101407	0.109947	0					0					63983	0.07	0.0865	0.0352	0.01389	1024	0.04	-0.43936	0.355559	0.216578	841	0.02	-0.05453	0.608793	0.928626	0					1621	0.01	0.150808	0.464675	0.745526	0
DQA1*05:05~DQB1*03:01~DRB1*11:01	21331	0.13	0.026871	0.041394	0.516236	4759	0.15	-0.02712	0.084723	0.748903	214958	0.1	0.118066	0.039233	0.00262	35513	0.13	0.056883	0.097416	0.559241	63983	0.14	0.0216	0.0264	0.4125	1024	0.02	0.396458	0.451502	0.379897	841	0.02	0.460382	0.582433	0.429267	0					1621	0.01	0.791035	0.424522	0.062412	0
DQA1*02:01~DQB1*02:01~DRB1*07:01	0					6330	0.2	0.141645	0.064713	0.02861	0					0					0					0					0					0					0					0
DQA1*01:05~DQB1*05:01~DRB1*12:01	0					0					0					0					0					0					0					1526	0.05	0.52402	0.337846	0.120887	1621	0.08	0.298686	0.189937	0.115823	0
DQA1*01:03~DQB1*06:03~DRB1*13:01	21331	0.12	-0.11429	0.041861	0.006328	6330	0.12	-0.02035	0.081018	0.801721	214958	0.12	0.0296	0.03682	0.421353	35513	0.13	-0.08438	0.098629	0.39225	63983	0.14	-0.0434	0.0258	0.09311	1024	0.12	0.072571	0.213741	0.734213	841	0.17	0.580931	0.24633	0.018357	1526	0.06	-0.06779	0.340269	0.842094	1621	0.04	0.116824	0.265828	0.660318	0
DQA1*03:03~DQB1*03:03~DRB1*13:01	0					0					0					0					0					0					0					0					1621	0.02	0.662054	0.355747	0.062741	0
DQA1*03:02~DQB1*03:03~DRB1*09:01	21331	0.02	0.223798	0.106171	0.03504	0					0					0					63983	0.02	0.0262	0.0596	0.66	0					0					0					0					0
DQA1*01:04~DQB1*05:02~DRB1*14:54	0					0					0					0					0					0					0					0					0					0
DQA1*05:05~DQB1*03:01~DRB1*08:04	0					0					0					0					0					0					0					1526	0.02	-0.51684	0.577594	0.370888	1621	0.03	-0.44375	0.318289	0.16327	0
DQA1*01:02~DQB1*05:01~DRB1*13:02	0					0					0					0					0					1024	0.01	-0.18814	0.570375	0.741514	841	0.02	-0.11052	0.562006	0.844097	1526	0.03	-0.69248	0.447261	0.121556	1621	0.04	-0.28662	0.277781	0.302159	0
DQA1*03:03~DQB1*03:02~DRB1*04:05	0					0					0					0					0					1024	0.02	-0.2522	0.454579	0.579032	841	0.02	-0.76446	0.730876	0.295586	1526	0.02	-0.16046	0.594061	0.787074	1621	0.02	-0.66709	0.336718	0.047573	0
DQA1*03:02~DQB1*03:01~DRB1*12:01	0					0					0					0					0					0					0					0					0					0
DQA1*01:01~DQB1*05:03~DRB1*14:01	0					6330	0.03	-0.19352	0.146041	0.18514	0					0					0					0					0					0					0					0
DQA1*05:03~DQB1*03:01~DRB1*14:02	0					0					0					0					0					1024	0.03	0.778908	0.420221	0.063801	841	0.02	-0.41061	0.721676	0.569382	0					0					0
DQA1*05:07~DQB1*03:01~DRB1*14:03	0					0					0					0					0					0					0					0					0					0
DQA1*05:05~DQB1*03:01~DRB1*12:01	21331	0.03	-0.03482	0.075659	0.645368	4759	0.04	0.123521	0.14789	0.403593	214958	0.04	-0.10477	0.065665	0.1106	35513	0.04	-0.02915	0.170191	0.864023	63983	0.03	-0.0236	0.0502	0.6391	1024	0.02	-0.0279	0.456655	0.951283	841	0.04	0.069224	0.446683	0.876842	0					1621	0.01	-0.10071	0.459516	0.826513	0
DQA1*03:03~DQB1*02:02~DRB1*07:01	0					0					0					0					0					0					0					1526	0.01	0.70221	0.63874	0.271608	1621	0.03	-0.63943	0.325112	0.049206	0
DQA1*01:02~DQB1*05:02~DRB1*16:02	0					0					0					0					0					0					0					1526	0.01	0.280702	0.712682	0.69368	1621	0.02	-0.2928	0.333638	0.380167	0
DQA1*03:03~DQB1*02:02~DRB1*09:01	0					0					0					0					0					0					0					1526	0.06	-0.439	0.344938	0.203126	1621	0.06	0.479794	0.215114	0.02572	0
DQA1*05:01~DQB1*03:01~DRB1*12:01	0					6330	0.04	0.168918	0.140498	0.229254	0					0					0					0					0					0					0					0
DQA1*03:01~DQB1*03:02~DRB1*04:07	0					0					0					0					0					1024	0.09	-0.28716	0.28252	0.309431	841	0.04	-0.29297	0.474073	0.536586	0					0					0
DQA1*05:05~DQB1*03:01~DRB1*11:04	21331	0.03	0.114178	0.077542	0.140895	4759	0.04	0.111106	0.156517	0.477788	214958	0.01	-0.00655	0.099363	0.947451	35513	0.03	0.0563	0.180443	0.75505	63983	0.04	0.0179	0.0497	0.7193	1024	0.03	0.122205	0.42364	0.772992	0					0					0					0
DQA1*04:01~DQB1*04:02~DRB1*03:02	0					0					0					35513	0.01	0.277784	0.350758	0.428381	0					1024	0.03	0.842436	0.387007	0.029496	841	0.03	0.195561	0.472386	0.678885	1526	0.19	-0.07132	0.214339	0.739325	1621	0.14	0.083497	0.145411	0.565823	0
DQA1*01:02~DQB1*06:03~DRB1*13:02	0					0					0					0					0					0					0					0					0					0
DQA1*01:02~DQB1*05:01~DRB1*13:01	0					0					0					0					0					0					0					1526	0.01	-0.3224	0.669687	0.630215	1621	0.02	-0.38537	0.367519	0.294379	0
DQA1*05:05~DQB1*03:01~DRB1*16:02	0					0					0					0					0					1024	0.04	0.281866	0.402186	0.483406	841	0.02	0.541021	0.591567	0.360425	0					0					0
DQA1*05:01~DQB1*03:01~DRB1*11:01	0					6330	0.13	-0.0746	0.076764	0.331165	0					0					0					0					0					0					0					0
DQA1*01:02~DQB1*06:02~DRB1*15:01	21331	0.26	0.015352	0.035508	0.665489	6330	0.26	-0.0418	0.060402	0.488912	214958	0.32	0.009199	0.025518	0.718714	35513	0.26	0.113498	0.074098	0.125581	63983	0.25	0.0065	0.0207	0.755	1024	0.17	0.146077	0.187131	0.43503	841	0.16	-0.35518	0.262216	0.17557	0					1621	0.04	-0.05499	0.260389	0.832744	0
DQA1*03:03~DQB1*03:01~DRB1*04:01	21331	0.08	-0.01865	0.050181	0.710201	4759	0.11	0.066402	0.096613	0.491895	214958	0.16	-0.04476	0.032505	0.168562	35513	0.1	0.007884	0.105663	0.94047	63983	0.08	0.0074	0.0345	0.83	1024	0.02	-0.76646	0.541772	0.157151	841	0.02	0.231053	0.845425	0.784624	0					1621	0.01	-0.99162	0.432521	0.021868	0
DQA1*04:01~DQB1*04:02~DRB1*08:02	0					0					0					0					0					1024	0.15	0.109339	0.231922	0.637321	841	0.08	-0.35871	0.369222	0.331288	0					0					0
DQA1*05:08~DQB1*03:01~DRB1*12:01	0					0					0					0					0					0					0					0					0					0
DQA1*05:05~DQB1*03:19i1~DRB1*11:02	0					0					0					0					0					0					0					1526	0.06	0.186744	0.318755	0.557973	1621	0.05	0.152298	0.23146	0.510546	0
DQA1*01:05~DQB1*05:01~DRB1*10:01	21331	0.02	0.026852	0.10068	0.789696	4759	0.02	0.100433	0.205432	0.624923	214958	0.01	-0.02883	0.102209	0.777854	35513	0.04	-0.09159	0.183896	0.61846	63504	0.02	0.0906	0.0636	0.1542	0					841	0.02	0.618683	0.683585	0.365435	1526	0.04	-0.23335	0.418837	0.577432	1621	0.04	0.117994	0.258278	0.64778	0
DQA1*01:01~DQB1*05:01~DRB1*10:01	0					6330	0.02	0.162158	0.192578	0.399767	0					0					0					0					0					0					0					0
DQA1*01:01~DQB1*05:01~DRB1*01:02	21331	0.04	0.102467	0.075776	0.176299	6330	0.04	-0.10561	0.134748	0.433162	214958	0.02	0.053634	0.0888	0.545917	35513	0.05	-0.01006	0.151374	0.947042	63983	0.03	0.0056	0.057	0.9223	1024	0.1	-0.05808	0.235027	0.804821	841	0.13	0.261055	0.273561	0.33994	1526	0.07	0.01733	0.301904	0.954226	1621	0.09	0.01596	0.17623	0.927839	0
DQA1*01:04~DQB1*05:03~DRB1*14:01	21331	0.05	0.086995	0.065575	0.184627	0					0					0					63983	0.06	0.0119	0.0385	0.7568	1024	0.03	-0.61208	0.409282	0.134783	841	0.02	-0.12546	0.575569	0.827446	0					0					0
DQA1*02:01~DQB1*02:02~DRB1*13:03	0					0					0					0					0					0					0					1526	0.06	-0.16617	0.366376	0.650149	1621	0.05	-0.1436	0.244365	0.556769	0
DQA1*03:01~DQB1*03:02~DRB1*08:02	0					0					0					0					0					0					0					0					0					0
DQA1*05:05~DQB1*03:19i1~DRB1*13:04	0					0					0					0					0					0					0					0					1621	0.03	0.191018	0.285191	0.502992	0
DQA1*01:03~DQB1*06:01~DRB1*15:02	21331	0.02	0.157277	0.10255	0.125115	6330	0.02	0.332507	0.188862	0.078309	214958	0.01	0.120816	0.117335	0.303166	35513	0.05	-0.02219	0.182438	0.903168	63504	0.01	-0.0552	0.0798	0.4893	1024	0.06	0.188077	0.300786	0.531784	841	0.04	-0.15227	0.458557	0.739838	0					0					0
DQA1*01:02~DQB1*05:02~DRB1*11:01	0					0					0					0					0					0					0					1526	0.01	-0.85623	0.657575	0.192882	1621	0.02	0.539019	0.366406	0.141265	0
DQA1*01:05~DQB1*05:03~DRB1*14:54	0					0					0					0					0					0					0					1526	0.02	0.411004	0.64325	0.522857	0					0
DQA1*01:01~DQB1*05:01~DRB1*15:02	0					0					0					0					0					0					0					0					0					0
DQA1*03:01~DQB1*03:01~DRB1*04:01	0					6330	0.1	-0.05548	0.088296	0.529755	0					0					0					0					0					0					0					0
DQA1*05:01~DQB1*02:01~DRB1*03:01	21331	0.24	-0.03792	0.041142	0.356733	6330	0.24	-0.09698	0.073896	0.18939	214958	0.33	0.006509	0.025363	0.797558	35513	0.3	-0.03845	0.071125	0.588803	63983	0.24	0.0015	0.0208	0.9426	1024	0.16	-0.28911	0.190121	0.128339	841	0.2	-0.16472	0.2286	0.47119	1526	0.15	0.314522	0.218454	0.149935	1621	0.14	-0.04557	0.147173	0.756837	0
DQA1*04:01~DQB1*03:19i1~DRB1*08:04	0					0					0					0					0					0					0					1526	0.1	-0.20009	0.281588	0.477339	1621	0.07	-0.03753	0.196424	0.848461	0
DQA1*03:01~DQB1*03:03~DRB1*09:01	0					6330	0.02	-0.0974	0.173632	0.574822	0					0					0					0					0					0					0					0
DQA1*01:03~DQB1*06:01~DRB1*08:03	0					0					0					0					0					0					0					0					0					0
DQA1*05:01~DQB1*03:01~DRB1*11:04	0					6330	0.03	0.084767	0.162533	0.601993	0					0					0					0					0					0					0					0
DQA1*04:01~DQB1*04:02~DRB1*08:09	0					0					0					0					0					0					0					0					0					0
DQA1*03:01~DQB1*03:01~DRB1*04:07	0					6330	0.01	-0.11512	0.233848	0.622507	0					0					0					0					0					0					0					0
DQA1*05:05~DQB1*03:19i1~DRB1*11:01	0					0					0					0					0					0					0					1526	0.03	-0.84003	0.482575	0.081732	1621	0.03	0.442464	0.281537	0.116044	0
DQA1*05:05~DQB1*03:01~DRB1*13:03	21331	0.02	0.009779	0.093222	0.916453	4759	0.02	-0.12897	0.199004	0.516925	214958	0.02	0.051862	0.082824	0.531263	35513	0.03	-0.02915	0.204276	0.886539	63983	0.02	-0.0646	0.0683	0.3447	1024	0.03	-0.02648	0.394497	0.946489	841	0.04	-0.9014	0.499439	0.071102	1526	0.06	0.291418	0.348809	0.403456	1621	0.03	-0.01891	0.302751	0.950201	0
DQA1*01:02~DQB1*05:02~DRB1*11:04	0					0					0					0					0					0					0					1526	0.04	0.204456	0.44941	0.64915	0					0
DQA1*04:01~DQB1*04:02~DRB1*08:04	0					0					0					0					0					0					0					1526	0.02	0.38831	0.7181	0.588683	1621	0.01	0.08816	0.431656	0.838169	0
DQA1*03:03~DQB1*04:01~DRB1*04:05	0					0					0					0					0					0					0					0					0					0
DQA1*01:04~DQB1*05:03~DRB1*14:05	0					0					0					0					0					0					0					0					0					0
DQA1*02:01~DQB1*02:02~DRB1*07:01	21331	0.17	0.073827	0.036407	0.042579	0					0					0					63983	0.19	-0.0066	0.0228	0.7735	1024	0.29	-0.11483	0.153748	0.455138	841	0.34	0.067273	0.194181	0.729009	1526	0.16	-0.12252	0.209917	0.559456	1621	0.17	-0.37765	0.13618	0.005551	0
DQA1*05:05~DQB1*03:01~DRB1*11:02	0					0					0					0					0					0					0					0					1621	0.02	0.113377	0.379966	0.765408	0
DQA1*04:01~DQB1*04:02~DRB1*08:01	21331	0.05	-0.00093	0.063967	0.988369	6330	0.05	-0.03104	0.12131	0.798034	214958	0.05	-0.02579	0.057648	0.654606	35513	0.04	-0.24972	0.165235	0.130711	63983	0.06	0.0406	0.0376	0.2791	1024	0.02	0.319978	0.438656	0.465727	841	0.03	-0.24197	0.609541	0.691391	0					0					0
DQA1*03:03~DQB1*03:02~DRB1*04:01	0					0					214958	0.01	-0.02669	0.099621	0.78876	0					12454	0.01	-0.0017	0.2537	0.9947	0					0					0					0					0
DQA1*01:02~DQB1*06:02~DRB1*11:01	0					0					0					0					0					0					0					1526	0.09	0.231324	0.280323	0.409256	1621	0.08	-0.05482	0.188604	0.771303	0
DQA1*01:02~DQB1*06:02~DRB1*15:03	0					0					0					35513	0.01	0.375862	0.37409	0.315035	0					1024	0.02	-0.62292	0.469438	0.184527	841	0.03	-0.78725	0.552114	0.1539	1526	0.33	0.118942	0.173262	0.492407	1621	0.28	-0.04723	0.114984	0.681225	0
DQA1*01:02~DQB1*06:04~DRB1*13:02	21331	0.07	-0.01389	0.054098	0.79737	6330	0.07	-0.07626	0.099814	0.444881	214958	0.07	0.004914	0.047721	0.917929	35513	0.06	-0.0746	0.132598	0.573696	63983	0.08	0.0108	0.0334	0.7462	1024	0.07	0.162155	0.271056	0.549685	841	0.09	0.295511	0.359462	0.411025	1526	0.02	-1.02	0.580818	0.079064	1621	0.02	0.082536	0.341135	0.808823	0
DQA1*01:02~DQB1*06:09~DRB1*13:02	21331	0.02	-0.17352	0.094289	0.065729	6330	0.02	0.163936	0.181084	0.365304	214958	0.02	0.14821	0.075224	0.048822	35513	0.04	-0.03867	0.166606	0.816453	63504	0.02	0.0018	0.0687	0.9795	1024	0.05	-0.17463	0.330232	0.596939	841	0.04	-0.1138	0.430174	0.791364	1526	0.04	-0.49956	0.369243	0.176074	1621	0.05	0.137659	0.236565	0.560631	0
DQA1*05:03~DQB1*03:01~DRB1*14:06	0					0					0					0					0					1024	0.06	0.247637	0.364486	0.496875	0					0					0					0
DQA1*05:05~DQB1*03:19~DRB1*11:02	0					0					0					0					0					1024	0.01	0.070411	0.663893	0.915536	841	0.02	0.094932	0.615493	0.877423	0					0					0
DQA1*03:01~DQB1*03:02~DRB1*04:02	21331	0.03	-0.07715	0.087609	0.378545	6330	0.03	0.164848	0.170054	0.332353	0					35513	0.04	0.245656	0.172031	0.153289	58279	0.01	-0.0468	0.0828	0.5724	0					0					0					0					0
DQA1*06:01~DQB1*03:01~DRB1*12:02	0					0					0					0					0					0					0					0					0					0
DQA1*01:02~DQB1*06:02~DRB1*13:02	0					0					0					0					0					0					0					0					0					0
DQA1*03:01~DQB1*03:02~DRB1*04:03	0					0					0					0					0					0					0					0					0					0
DQA1*01:04~DQB1*05:03~DRB1*14:54	0					4759	0.06	-0.12136	0.126938	0.33905	214958	0.05	0.021385	0.054597	0.695407	35513	0.07	-0.09716	0.138949	0.484382	0					0					0					0					1621	0.02	0.072914	0.372368	0.844757	0
DQA1*05:01~DQB1*03:01~DRB1*13:03	0					6330	0.02	0.004684	0.182407	0.979514	0					0					0					0					0					0					0					0
DQA1*01:02~DQB1*05:02~DRB1*16:01	21331	0.03	0.066638	0.080524	0.40792	6330	0.02	0.267955	0.173235	0.121918	214958	0.01	0.065031	0.10213	0.52431	35513	0.03	-0.05506	0.190492	0.772545	63983	0.05	-0.065	0.0469	0.1664	1024	0.03	0.30267	0.364478	0.406301	841	0.03	0.568528	0.464517	0.220986	0					0					0
DQA1*01:01~DQB1*06:01~DRB1*15:02	0					0					0					0					0					0					0					0					0					0
DQA1*03:03~DQB1*04:02~DRB1*04:05	0					0					0					0					0					0					0					0					0					0
DQA1*01:02~DQB1*05:02~DRB1*15:01	0					0					0					0					0					0					0					0					0					0
DQA1*05:03~DQB1*03:01~DRB1*14:03	0					0					0					0					0					0					0					0					0					0
DQA1*03:01~DQB1*03:02~DRB1*12:02	0					0					0					0					0					0					0					0					0					0
DQA1*05:06~DQB1*03:01~DRB1*12:01	0					0					0					0					0					0					0					0					0					0
DQA1*05:05~DQB1*03:01~DRB1*15:01	0					0					0					0					0					0					0					0					0					0
DQA1*01:02~DQB1*03:03~DRB1*09:01	0					0					0					0					0					0					0					0					0					0
DQA1*05:05~DQB1*03:01~DRB1*12:02	0					0					0					0					0					0					0					0					0					0
DQA1*01:04~DQB1*03:01~DRB1*14:54	0					0					0					0					0					0					0					0					0					0
DQA1*03:02~DQB1*03:03~DRB1*12:01	0					0					0					0					0					0					0					0					0					0
DQA1*03:03~DQB1*04:01~DRB1*07:01	0					0					0					0					0					0					0					0					0					0
[truncated: 25 more columns]

## Sheet: amino acids
HLA	N_US_European	Freq_EUR_ADGC	BETA_EUR_ADGC	SE_EUR_ADGC	P_EUR_ADGC	N_US_European_WGS	Freq_EUR_ADSP	BETA_EUR_ADSP	SE_EUR_ADSP	P_EUR_ADSP	N_UKB_British	Freq_British_UKB	BETA_British_UKB	SE_British_UKB	P_British_UKB	N_UKB_Others	Freq_Others_UKB	BETA_Others_UKB	SE_Others_UKB	P_Others_UKB	N_EADB	Freq_EUR_EADB_Bellenguez2021	BETA_EUR_EADB_Bellenguez2021	SE_EUR_EADB_Bellenguez2021	P_EUR_EADB_Bellenguez2021	N_US_Latino	Freq_AMR/Lat_ADGC	BETA_AMR/Lat_ADGC	SE_AMR/Lat_ADGC	P_AMR/Lat_ADGC	N_US_Latino_WGS	Freq_AMR/Lat_ADSP	BETA_AMR/Lat_ADSP	SE_AMR/Lat_ADSP	P_AMR/Lat_ADSP	N_US_African	Freq_AFR_ADGC	BETA_AFR_ADGC	SE_AFR_ADGC	P_AFR_ADGC	N_US_African_WGS	Freq_AFR_ADSP	BETA_AFR_ADSP	SE_AFR_ADSP	P_AFR_ADSP	N_Japan_NCGG	Freq_Japan_NCGG	BETA_Japan_NCGG	SE_Japan_NCGG
DRB1_33_H	29687	0.29	-0.09375	0.025948	0.000303	7143	0.29	-0.15116	0.053394	0.004641	325050	0.35	-0.10994	0.020151	4.88e-08	63001	0.26	-0.09651	0.056283	0.0864	82424	0.24	-0.0965	0.0184	1.53e-07	4265	0.31	-0.01023	0.124394	0.934455	3236	0.28	-0.22279	0.170597	0.191582	2047	0.05	0.079056	0.316695	0.802875	2091	0.08	-0.29517	0.164075	0.072017	5927	0.4	0.106255	0.056297
DRB1_13_H	29687	0.29	-0.09375	0.025948	0.000303	7143	0.29	-0.15116	0.053394	0.004641	325050	0.35	-0.10994	0.020151	4.88e-08	63001	0.26	-0.09651	0.056283	0.0864	82424	0.24	-0.0965	0.0184	1.53e-07	4265	0.31	-0.01023	0.124394	0.934455	3236	0.28	-0.22279	0.170597	0.191582	2047	0.05	0.079056	0.316695	0.802875	2091	0.08	-0.29517	0.164075	0.072017	5927	0.4	0.106255	0.056297
DQA1_26_S	29687	0.2	-0.12815	0.029502	1.4e-05	7143	0.32	-0.14495	0.052358	0.005631	325050	0.22	-0.11126	0.023478	2.15e-06	63001	0.18	-0.05643	0.064543	0.381983	89860	0.2	-0.1013	0.0189	8.41e-08	4265	0.27	0.065934	0.131217	0.615331	3236	0.23	-0.25979	0.184019	0.158015	829	0.03	-0.38859	0.586399	0.507544	2091	0.03	-0.0932	0.270759	0.73068	6065	0.42	0.009083	0.055621
DQA1_56_R	29687	0.2	-0.12815	0.029502	1.4e-05	7143	0.32	-0.14495	0.052358	0.005631	325050	0.22	-0.11126	0.023478	2.15e-06	63001	0.18	-0.05643	0.064543	0.381983	89860	0.2	-0.1013	0.0189	8.41e-08	4265	0.27	0.065934	0.131217	0.615331	3236	0.23	-0.25979	0.184019	0.158015	829	0.03	-0.38859	0.586399	0.507544	2091	0.03	-0.0932	0.270759	0.73068	6065	0.42	0.009083	0.055621
DQA1_47_Q	29687	0.2	-0.12815	0.029502	1.4e-05	7143	0.32	-0.14495	0.052358	0.005631	325050	0.22	-0.11126	0.023478	2.15e-06	63001	0.18	-0.05643	0.064543	0.381983	89860	0.2	-0.1013	0.0189	8.41e-08	4265	0.27	0.065934	0.131217	0.615331	3236	0.23	-0.25979	0.184019	0.158015	829	0.03	-0.38859	0.586399	0.507544	2091	0.03	-0.0932	0.270759	0.73068	6065	0.42	0.009083	0.055621
DQA1_76_V	29687	0.2	-0.12815	0.029502	1.4e-05	7143	0.32	-0.14495	0.052358	0.005631	325050	0.22	-0.11126	0.023478	2.15e-06	63001	0.18	-0.05643	0.064543	0.381983	89860	0.2	-0.1013	0.0189	8.41e-08	4265	0.27	0.065934	0.131217	0.615331	3236	0.23	-0.25979	0.184019	0.158015	829	0.03	-0.38859	0.586399	0.507544	2091	0.03	-0.0932	0.270759	0.73068	6065	0.42	0.009083	0.055621
DRB1_11_V	29687	0.3	-0.08032	0.025549	0.001668	7143	0.31	-0.12329	0.052628	0.019145	325050	0.36	-0.11126	0.020026	2.76e-08	63001	0.29	-0.11855	0.054624	0.029988	82424	0.26	-0.0837	0.0178	2.65e-06	4265	0.35	-0.03316	0.120234	0.78272	3236	0.33	-0.13654	0.162629	0.401144	2050	0.09	-0.01742	0.2473	0.943834	2091	0.12	-0.17814	0.137442	0.194947	5927	0.4	0.10017	0.05611
DQB1_57_A	29687	0.38	-0.09654	0.025888	0.000192	7143	0.54	-0.0411	0.048968	0.401324	325050	0.44	-0.07492	0.019249	9.94e-05	63001	0.37	-0.08054	0.051584	0.118441	90188	0.39	-0.0704	0.0152	3.46e-06	4265	0.38	-0.09688	0.118685	0.414328	3236	0.37	-0.22338	0.157402	0.155855	2056	0.18	0.184752	0.181648	0.30911	2091	0.2	-0.12615	0.113153	0.264914	6070	0.17	-0.00617	0.068881
DRB1_9_Ref	29687	0.65	0.090123	0.024837	0.000285	7143	0.65	0.138048	0.051009	0.006803	325050	0.67	0.055619	0.020322	0.006206	63001	0.63	0.128371	0.052195	0.013917	82424	0.66	0.064	0.0163	8.96e-05	4265	0.55	0.165127	0.114212	0.148234	3236	0.59	0.1894	0.152257	0.213517	2062	0.55	0.111619	0.14324	0.435835	2091	0.55	-0.12943	0.089922	0.150056	5927	0.43	-0.10645	0.070002
DQA1_52_R	29687	0.44	-0.09214	0.024957	0.000223	7143	0.7	-0.12293	0.053217	0.020891	325050	0.49	-0.07176	0.019096	0.000172	63001	0.44	-0.07342	0.049917	0.14135	89860	0.45	-0.0512	0.0149	0.000586	4265	0.55	0.101308	0.118223	0.391486	3236	0.49	-0.13461	0.152388	0.377045	2063	0.41	0.033107	0.146314	0.820991	2091	0.35	0.0584	0.093598	0.532662	6065	0.55	0.00339	0.056036
DRB1_37_Ref	29687	0.48	0.093154	0.023778	8.94e-05	7143	0.48	0.086668	0.048832	0.075928	325050	0.48	0.057952	0.019117	0.002434	63001	0.46	0.103097	0.049636	0.037808	82424	0.48	0.0441	0.0154	0.004171	4265	0.37	0.228104	0.116512	0.050257	3236	0.4	0.246977	0.152478	0.105285	2062	0.41	0.163556	0.144422	0.257429	2091	0.42	-0.06608	0.090514	0.465341	5927	0.47	-0.09717	0.065437
DQB1_71_Ref	29687	0.27	0.07703	0.026402	0.003528	7143	0.26	0.160588	0.055256	0.003658	325050	0.24	0.051394	0.022289	0.021107	63001	0.27	0.011288	0.056384	0.841397	90188	0.28	0.0594	0.0164	0.000284	4265	0.25	0.116725	0.130885	0.372493	3236	0.29	0.314126	0.162902	0.053817	2056	0.31	-0.056	0.153488	0.715209	2091	0.35	-0.00906	0.093729	0.922983	6070	0.16	0.058969	0.070498
DQB1_74_Ref	29687	0.32	0.054166	0.025235	0.031836	7143	0.31	0.151307	0.052654	0.004058	325050	0.28	0.035621	0.021301	0.094527	63001	0.32	0.00072	0.053856	0.989321	90188	0.34	0.0595	0.0156	0.000138	4265	0.4	0.18836	0.11555	0.103077	3236	0.44	0.108974	0.150811	0.469935	2056	0.46	-0.01084	0.143736	0.939909	2091	0.47	0.016005	0.089772	0.858499	6070	0.44	0.191039	0.05378
DQB1_14_Ref	29687	0.27	0.074902	0.026347	0.004471	7143	0.27	0.165589	0.055145	0.002675	325050	0.24	0.045518	0.022225	0.040508	63001	0.27	0.013296	0.056204	0.813009	90188	0.28	0.0601	0.0163	0.000238	4265	0.25	0.116725	0.130885	0.372493	3236	0.29	0.314126	0.162902	0.053817	2056	0.31	-0.056	0.153488	0.715209	2091	0.35	-0.00906	0.093729	0.922983	6070	0.16	0.058969	0.070498
DRB1_13_Ref	29687	0.26	0.072672	0.026767	0.006627	7143	0.26	0.112082	0.055126	0.042035	325050	0.26	0.043582	0.021734	0.04494	63001	0.23	0.040448	0.057825	0.484155	82424	0.27	0.063	0.0174	0.000291	4265	0.2	0.027679	0.139937	0.843204	3236	0.24	0.305658	0.174106	0.079159	2062	0.19	0.029866	0.179606	0.86793	2091	0.22	0.10267	0.107666	0.340286	5927	0.37	-0.01187	0.055574
DQB1_26_Ref	29687	0.36	0.034638	0.024487	0.157202	7143	0.35	0.0784	0.050983	0.124101	325050	0.31	0.044775	0.020537	0.029247	63001	0.37	-0.01003	0.052067	0.847264	90188	0.39	0.0617	0.0152	4.76e-05	4265	0.44	0.087052	0.114241	0.44606	3236	0.45	0.145657	0.150135	0.331961	2057	0.49	0.112232	0.143278	0.433442	2091	0.49	0.024987	0.089558	0.780242	6070	0.49	0.171837	0.053141
DRB1_31_Ref	29687	0.24	0.064626	0.027365	0.018193	7143	0.25	0.089727	0.056259	0.110733	325050	0.25	0.044325	0.022017	0.044078	63001	0.2	0.075343	0.060336	0.211771	82424	0.25	0.062	0.0178	0.000503	4265	0.17	0.116389	0.149967	0.43769	3236	0.19	0.331291	0.187758	0.077655	2062	0.15	0.058676	0.194595	0.763009	2091	0.19	0.074795	0.115044	0.515601	5927	0.37	-0.00687	0.055788
DRB1_71_K	29687	0.38	-0.04651	0.026517	0.0794	7143	0.39	-0.0969	0.050904	0.056954	325050	0.48	-0.04718	0.019116	0.013583	63001	0.36	-0.10024	0.052372	0.055617	82424	0.38	-0.045	0.0161	0.005063	4265	0.21	-0.09687	0.139134	0.48627	3236	0.24	-0.18045	0.176348	0.30618	2062	0.4	0.220849	0.145699	0.129573	2091	0.34	-0.12151	0.094651	0.199215	5927	0.02	-0.42828	0.175103
DRB1_11_Ref	29687	0.22	0.06214	0.028101	0.027013	7143	0.23	0.106452	0.057841	0.065704	325050	0.23	0.044697	0.022746	0.049428	63001	0.18	0.071062	0.062955	0.259021	82424	0.23	0.0631	0.0183	0.000557	4265	0.15	0.061717	0.157712	0.695553	3236	0.18	0.409792	0.193883	0.034549	2055	0.1	0.361636	0.232584	0.119979	2091	0.13	-0.17784	0.132486	0.179483	5927	0.1	0.073599	0.08561
DRB1_30_Ref	29687	0.22	0.06214	0.028101	0.027013	7143	0.23	0.106452	0.057841	0.065704	325050	0.23	0.044697	0.022746	0.049428	63001	0.18	0.071062	0.062955	0.259021	82424	0.23	0.0631	0.0183	0.000557	4265	0.15	0.061717	0.157712	0.695553	3236	0.18	0.409792	0.193883	0.034549	2055	0.1	0.361636	0.232584	0.119979	2091	0.13	-0.17784	0.132486	0.179483	5927	0.1	0.073599	0.08561
DQB1_57_Ref	29687	0.31	0.050068	0.025252	0.047395	7143	0.31	0.069269	0.052385	0.186065	325050	0.29	0.046065	0.020925	0.027697	63001	0.29	0.019128	0.054333	0.724791	90188	0.31	0.0595	0.0158	0.00017	4265	0.29	0.052841	0.124115	0.670297	3236	0.35	0.217667	0.156584	0.164499	2062	0.32	-0.21292	0.150897	0.158242	2091	0.4	-0.02188	0.09137	0.810705	6070	0.27	0.016728	0.072849
DRB1_28_Ref	29687	0.48	0.049014	0.023389	0.036121	7143	0.48	0.121018	0.048612	0.012794	325050	0.49	0.030526	0.019087	0.109673	63001	0.48	0.091781	0.049397	0.063152	82424	0.5	0.0515	0.0154	0.000843	4265	0.5	0.02546	0.113241	0.822112	3236	0.54	0.117743	0.150575	0.43424	2062	0.49	0.160593	0.141965	0.257967	2091	0.5	-0.0926	0.089391	0.300257	5927	0.26	-0.01035	0.059885
DQB1_87_Ref	29687	0.35	0.059965	0.024626	0.01489	7143	0.34	0.112769	0.051362	0.028123	325050	0.31	0.038507	0.020667	0.062386	63001	0.34	-0.0011	0.052655	0.983333	90188	0.35	0.0517	0.0153	0.00076	4265	0.31	0.100051	0.122325	0.413407	3236	0.38	0.242328	0.153899	0.11535	2062	0.38	-0.25206	0.145464	0.083131	2091	0.44	0.005769	0.0901	0.948948	6070	0.31	0.008694	0.065948
DQB1_55_Ref	29687	0.69	0.050479	0.025754	0.049984	7143	0.68	0.029786	0.052213	0.56836	325050	0.65	0.066444	0.020122	0.000959	63001	0.7	0.028062	0.053595	0.600527	90188	0.69	0.0361	0.016	0.02398	4265	0.68	0.12085	0.122203	0.322696	3236	0.75	0.195927	0.173518	0.258837	2063	0.82	0.091593	0.183714	0.618088	2091	0.82	0.01103	0.116678	0.924682	6070	0.86	0.115398	0.079853
DRB1_58_E	29687	0.19	0.048305	0.030535	0.113659	7143	0.19	0.021964	0.063369	0.728884	325050	0.12	0.077691	0.029539	0.008541	63001	0.19	0.107915	0.065832	0.101181	82424	0.19	0.0559	0.0204	0.005999	4265	0.21	-0.02892	0.139104	0.835277	3236	0.15	-0.09152	0.204717	0.65484	2061	0.26	-0.11306	0.163099	0.488173	2091	0.26	0.068471	0.102001	0.502044	5927	0.06	0.200255	0.11473
DQB1_53_Ref	29687	0.66	0.059875	0.02507	0.016925	7143	0.65	0.039047	0.051057	0.44441	325050	0.63	0.061931	0.019811	0.001773	63001	0.67	0.04671	0.05227	0.371536	90188	0.66	0.0346	0.0155	0.0257	4265	0.56	0.0389	0.116061	0.737497	3236	0.64	0.365786	0.15956	0.021879	2063	0.73	-0.04942	0.16032	0.757884	2091	0.75	-0.05076	0.103727	0.624592	6070	0.71	-0.04625	0.068346
DRB1_33_Ref	29687	0.97	0.207981	0.071949	0.003844	7143	0.97	0.189871	0.146522	0.195027	325050	0.96	0.205763	0.052438	8.71e-05	63001	0.98	0.15066	0.165996	0.36411	81908	0.98	0.0238	0.0605	0.6941	4265	0.97	0.27031	0.326236	0.407346	3236	0.98	0.535574	0.526139	0.30871	2047	0.99	1.2561	0.867971	0.147849	2091	1	-0.69482	0.687534	0.312211	5927	0.94	-0.09691	0.110134
DQB1_70_Ref	29687	0.56	0.0617	0.023912	0.009872	7143	0.55	0.093216	0.049031	0.057282	325050	0.54	0.057738	0.019185	0.002615	63001	0.53	0.037506	0.049939	0.452623	90188	0.56	0.029	0.0148	0.04984	4265	0.45	0.09234	0.11473	0.42091	3236	0.54	0.29546	0.151586	0.05128	2063	0.67	0.017397	0.150473	0.90796	2091	0.67	-0.0303	0.095037	0.74982	6070	0.29	-0.08812	0.056857
DQB1_86_Ref	29687	0.56	0.060737	0.023922	0.011119	7143	0.55	0.097719	0.049041	0.046305	325050	0.55	0.053284	0.01919	0.005496	63001	0.53	0.038703	0.049965	0.438646	90188	0.56	0.0298	0.0148	0.04437	4265	0.45	0.09234	0.11473	0.42091	3236	0.54	0.29546	0.151586	0.05128	2063	0.67	0.017397	0.150473	0.90796	2091	0.67	-0.0303	0.095037	0.74982	6070	0.29	-0.08812	0.056857
DRB1_26_Ref	29687	0.27	0.064425	0.026426	0.014773	7143	0.28	0.142896	0.054229	0.008413	325050	0.26	0.026148	0.021688	0.228063	63001	0.25	0.014547	0.056734	0.797742	82424	0.28	0.0509	0.0172	0.00309	4265	0.22	-0.11366	0.13633	0.404435	3236	0.28	0.223414	0.166638	0.180013	2055	0.2	0.265894	0.175064	0.128804	2091	0.24	0.03099	0.103947	0.765599	5927	0.2	-0.0394	0.064977
DRB1_37_Y	29687	0.52	-0.0546	0.023829	0.021954	7143	0.52	-0.08334	0.049001	0.088981	325050	0.49	-0.06738	0.019105	0.00042	63001	0.51	-0.08155	0.049752	0.101206	82424	0.48	-0.0162	0.0154	0.2938	4265	0.64	-0.06409	0.117706	0.586126	3236	0.56	-0.20511	0.151038	0.174454	2063	0.55	-0.09989	0.142552	0.483483	2091	0.53	-0.04596	0.089612	0.608037	5927	0.57	0.154611	0.055465
DRB1_9_E	29687	0.82	-0.06844	0.030448	0.024588	7143	0.82	-0.07174	0.063745	0.260398	325050	0.81	-0.05559	0.024193	0.021566	63001	0.82	-0.16853	0.062736	0.007224	82424	0.81	-0.0366	0.0198	0.06404	4265	0.88	-0.02122	0.17014	0.900743	3236	0.87	0.018764	0.220401	0.932155	2063	0.8	-0.12479	0.18053	0.489413	2091	0.82	0.141256	0.116487	0.225272	5927	0.82	0.134318	0.07266
DQA1_69_L	29687	0.56	-0.0103	0.024628	0.67591	7143	0.8	-0.13548	0.061216	0.026885	325050	0.65	-0.05422	0.019966	0.006613	63001	0.58	0.042055	0.051004	0.409592	89860	0.58	-0.0415	0.015	0.005553	4265	0.59	-0.06993	0.116035	0.546762	3236	0.56	-0.15908	0.151175	0.29267	2063	0.34	0.073133	0.148892	0.6233	2091	0.35	-0.22473	0.094344	0.017218	6065	0.48	0.024717	0.055498
DQB1_89_Ref	29687	0.62	0.055476	0.024406	0.023024	7143	0.61	0.062583	0.049881	0.209606	325050	0.6	0.049834	0.019484	0.010546	63001	0.59	0.023304	0.050666	0.645674	90188	0.61	0.0323	0.0151	0.03236	4265	0.51	0.107975	0.114823	0.347035	3236	0.61	0.312745	0.155501	0.044304	2063	0.71	-0.07143	0.157245	0.649661	2091	0.74	-0.0422	0.101437	0.677406	6070	0.43	-0.08868	0.058083
DQB1_85_Ref	29687	0.62	0.055476	0.024406	0.023024	7143	0.61	0.062583	0.049881	0.209606	325050	0.6	0.049834	0.019484	0.010546	63001	0.59	0.023304	0.050666	0.645674	90188	0.61	0.0323	0.0151	0.03236	4265	0.51	0.107975	0.114823	0.347035	3236	0.61	0.312745	0.155501	0.044304	2063	0.71	-0.07143	0.157245	0.649661	2091	0.74	-0.0422	0.101437	0.677406	6070	0.43	-0.08868	0.058083
DQB1_84_Ref	29687	0.62	0.055476	0.024406	0.023024	7143	0.61	0.062583	0.049881	0.209606	325050	0.6	0.049834	0.019484	0.010546	63001	0.59	0.023304	0.050666	0.645674	90188	0.61	0.0323	0.0151	0.03236	4265	0.51	0.107975	0.114823	0.347035	3236	0.61	0.312745	0.155501	0.044304	2063	0.71	-0.07143	0.157245	0.649661	2091	0.74	-0.0422	0.101437	0.677406	6070	0.43	-0.08868	0.058083
DQB1_90_Ref	29687	0.62	0.055476	0.024406	0.023024	7143	0.61	0.062583	0.049881	0.209606	325050	0.6	0.049834	0.019484	0.010546	63001	0.59	0.023304	0.050666	0.645674	90188	0.61	0.0323	0.0151	0.03236	4265	0.51	0.107975	0.114823	0.347035	3236	0.61	0.312745	0.155501	0.044304	2063	0.71	-0.07143	0.157245	0.649661	2091	0.74	-0.0422	0.101437	0.677406	6070	0.43	-0.08868	0.058083
DQA1_50_L	29687	0.39	-0.00952	0.023952	0.691142	7143	0.52	-0.0609	0.048711	0.211225	325050	0.45	-0.05787	0.019186	0.002558	63001	0.41	0.076075	0.050242	0.129941	89860	0.41	-0.0414	0.015	0.005646	4265	0.46	0.005923	0.113807	0.958494	3236	0.45	-0.25765	0.15189	0.089835	2063	0.22	-0.10454	0.171248	0.541556	2091	0.22	-0.28555	0.108369	0.008415	6065	0.42	0.006198	0.055574
DQA1_53_R	29687	0.39	-0.00952	0.023952	0.691142	7143	0.52	-0.0609	0.048711	0.211225	325050	0.45	-0.05787	0.019186	0.002558	63001	0.41	0.076075	0.050242	0.129941	89860	0.41	-0.0414	0.015	0.005646	4265	0.46	0.005923	0.113807	0.958494	3236	0.45	-0.25765	0.15189	0.089835	2063	0.22	-0.10454	0.171248	0.541556	2091	0.22	-0.28555	0.108369	0.008415	6065	0.42	0.006198	0.055574
DQB1_26_L	29687	0.74	-0.07161	0.02741	0.00899	7143	0.83	-0.07531	0.066151	0.254906	325050	0.79	-0.02105	0.023294	0.366104	63001	0.71	-0.00199	0.056382	0.971879	90188	0.72	-0.0473	0.0167	0.004602	4265	0.64	-0.13721	0.117607	0.243325	3236	0.68	0.004399	0.159941	0.978056	2063	0.63	0.049743	0.147453	0.735856	2091	0.64	0.05956	0.092998	0.521884	6070	0.65	-0.04637	0.057928
DRB1_67_F	29687	0.28	0.02963	0.026845	0.269703	7143	0.27	0.048259	0.055874	0.387744	325050	0.18	0.049053	0.024604	0.046199	63001	0.28	0.019148	0.05796	0.741176	82424	0.29	0.0383	0.0174	0.02771	4265	0.37	0.053418	0.118233	0.65141	3236	0.25	-0.12049	0.172191	0.484073	2061	0.38	-0.36439	0.148192	0.013937	2091	0.35	0.17685	0.09372	0.059162	5927	0.42	0.002616	0.056591
DQA1_11_Y	29687	0.59	-0.01453	0.024719	0.556772	7143	0.82	-0.11565	0.064057	0.071016	325050	0.67	-0.06133	0.020277	0.00249	63001	0.62	0.029679	0.051406	0.563699	89860	0.62	-0.0304	0.0152	0.04542	4265	0.7	0.087097	0.123735	0.481496	3236	0.66	-0.093	0.15755	0.555	2063	0.57	-0.06622	0.143008	0.643333	2091	0.51	-0.1829	0.089548	0.041101	6065	0.52	0.009772	0.055724
DRB1_28_D	29687	0.91	-0.07753	0.041322	0.060606	7143	0.92	-0.11125	0.087203	0.202045	325050	0.91	-0.00189	0.033295	0.954801	63001	0.91	-0.09119	0.086572	0.292208	82424	0.91	-0.0784	0.0265	0.0031	4265	0.9	-0.05541	0.186399	0.766247	3236	0.9	-0.19935	0.240074	0.406342	2063	0.89	-0.26837	0.222332	0.22741	2091	0.88	0.025286	0.139135	0.855792	5927	0.9	0.029055	0.087912
DQB1_38_Ref	29687	0.51	0.039095	0.024434	0.109592	7143	0.64	0.102593	0.050542	0.04237	325050	0.51	0.023422	0.019094	0.219889	63001	0.55	-0.04953	0.049775	0.319687	90188	0.52	0.0365	0.0147	0.01305	4265	0.4	-0.07389	0.116199	0.52484	3236	0.44	0.236646	0.151804	0.119022	2057	0.45	0.273516	0.143542	0.056718	2091	0.48	0.011152	0.089391	0.900714	6070	0.52	0.056708	0.061055
DRB1_86_V	29687	0.7	-0.02325	0.025884	0.369053	7143	0.7	-0.09355	0.053407	0.07984	325050	0.7	-0.00172	0.020812	0.934265	63001	0.72	-0.00415	0.055012	0.939827	82424	0.7	-0.056	0.0167	0.000817	4265	0.64	-0.00193	0.117556	0.986934	3236	0.68	-0.15945	0.160509	0.320517	2063	0.77	0.000237	0.166769	0.998866	2091	0.74	0.02382	0.102104	0.815536	5927	0.44	-0.09678	0.053245
DQA1_48_L	29687	0.6	-0.00939	0.024731	0.704236	7143	0.83	-0.10925	0.06444	0.090011	325050	0.68	-0.05805	0.020325	0.004289	63001	0.63	0.020831	0.051619	0.68653	89860	0.63	-0.0305	0.0152	0.045	4265	0.7	0.087097	0.123735	0.481496	3236	0.66	-0.093	0.15755	0.555	2063	0.57	-0.04914	0.143055	0.731211	2091	0.51	-0.16741	0.089567	0.061615	6065	0.55	-0.00117	0.056034
DQA1_64_T	29687	0.6	-0.00939	0.024731	0.704236	7143	0.83	-0.10925	0.06444	0.090011	325050	0.68	-0.05805	0.020325	0.004289	63001	0.63	0.020831	0.051619	0.68653	89860	0.63	-0.0305	0.0152	0.045	4265	0.7	0.087097	0.123735	0.481496	3236	0.66	-0.093	0.15755	0.555	2063	0.57	-0.04914	0.143055	0.731211	2091	0.51	-0.16741	0.089567	0.061615	6065	0.55	-0.00117	0.056034
DQA1_55_R	29687	0.6	-0.00939	0.024731	0.704236	7143	0.83	-0.10925	0.06444	0.090011	325050	0.68	-0.05805	0.020325	0.004289	63001	0.63	0.020831	0.051619	0.68653	89860	0.63	-0.0305	0.0152	0.045	4265	0.7	0.087097	0.123735	0.481496	3236	0.66	-0.093	0.15755	0.555	2063	0.57	-0.04914	0.143055	0.731211	2091	0.51	-0.16741	0.089567	0.061615	6065	0.55	-0.00117	0.056034
DQA1_80_S	29687	0.6	-0.00939	0.024731	0.704236	7143	0.83	-0.10925	0.06444	0.090011	325050	0.68	-0.05805	0.020325	0.004289	63001	0.63	0.020831	0.051619	0.68653	89860	0.63	-0.0305	0.0152	0.045	4265	0.7	0.087097	0.123735	0.481496	3236	0.66	-0.093	0.15755	0.555	2063	0.57	-0.04914	0.143055	0.731211	2091	0.51	-0.16741	0.089567	0.061615	6065	0.55	-0.00117	0.056034
DQA1_61_F	29687	0.6	-0.00939	0.024731	0.704236	7143	0.83	-0.10925	0.06444	0.090011	325050	0.68	-0.05805	0.020325	0.004289	63001	0.63	0.020831	0.051619	0.68653	89860	0.63	-0.0305	0.0152	0.045	4265	0.7	0.087097	0.123735	0.481496	3236	0.66	-0.093	0.15755	0.555	2063	0.57	-0.04914	0.143055	0.731211	2091	0.51	-0.16741	0.089567	0.061615	6065	0.55	-0.00117	0.056034
DQA1_45_V	29687	0.6	-0.00939	0.024731	0.704236	7143	0.83	-0.10925	0.06444	0.090011	325050	0.68	-0.05805	0.020325	0.004289	63001	0.63	0.020831	0.051619	0.68653	89860	0.63	-0.0305	0.0152	0.045	4265	0.7	0.087097	0.123735	0.481496	3236	0.66	-0.093	0.15755	0.555	2063	0.57	-0.04914	0.143055	0.731211	2091	0.51	-0.16741	0.089567	0.061615	6065	0.55	-0.00117	0.056034
DQA1_18_S	29687	0.6	-0.00939	0.024731	0.704236	7143	0.83	-0.10925	0.06444	0.090011	325050	0.68	-0.05805	0.020325	0.004289	63001	0.63	0.020831	0.051619	0.68653	89860	0.63	-0.0305	0.0152	0.045	4265	0.7	0.087097	0.123735	0.481496	3236	0.66	-0.093	0.15755	0.555	2063	0.57	-0.04914	0.143055	0.731211	2091	0.51	-0.16741	0.089567	0.061615	6065	0.55	-0.00117	0.056034
DQA1_66_I	29687	0.6	-0.00939	0.024731	0.704236	7143	0.83	-0.10925	0.06444	0.090011	325050	0.68	-0.05805	0.020325	0.004289	63001	0.63	0.020831	0.051619	0.68653	89860	0.63	-0.0305	0.0152	0.045	4265	0.7	0.087097	0.123735	0.481496	3236	0.66	-0.093	0.15755	0.555	2063	0.57	-0.04914	0.143055	0.731211	2091	0.51	-0.16741	0.089567	0.061615	6065	0.55	-0.00117	0.056034
DQB1_75_Ref	29687	0.5	0.032558	0.024536	0.184534	7143	0.63	0.142197	0.050279	0.004682	325050	0.5	0.01419	0.019087	0.457479	63001	0.5	-0.06931	0.049458	0.161108	90188	0.52	0.0309	0.0147	0.03542	4265	0.49	0.126439	0.113531	0.265408	3236	0.53	0.042251	0.150522	0.778944	2056	0.56	0.125307	0.144107	0.384553	2091	0.56	0.029261	0.090067	0.745276	6070	0.44	0.189846	0.053768
DRB1_71_Ref	29687	0.76	0.017207	0.02774	0.535074	7143	0.76	0.024252	0.057619	0.673822	325050	0.71	0.013375	0.021171	0.527574	63001	0.76	0.06133	0.057895	0.289523	82424	0.77	0.0547	0.0184	0.002897	4265	0.88	0.01646	0.172116	0.923811	3236	0.82	0.01871	0.195466	0.923744	2063	0.66	-0.11617	0.150342	0.439699	2091	0.7	-0.01883	0.097693	0.847191	5927	0.89	0.363308	0.097437
DRB1_30_Y	29687	0.91	-0.07612	0.041367	0.065738	7143	0.91	-0.11979	0.087013	0.168616	325050	0.91	-0.00305	0.033296	0.927076	63001	0.91	-0.07422	0.086167	0.38905	82424	0.91	-0.0804	0.0265	0.002451	4265	0.93	-0.02952	0.212942	0.889728	3236	0.9	-0.13323	0.244453	0.585737	2063	0.84	-0.15036	0.191833	0.433157	2091	0.84	0.130048	0.122601	0.288808	5927	0.92	0.071252	0.095539
DQA1_64_Ref	29687	0.63	0.021472	0.024516	0.381125	7143	0.65	0.037939	0.051052	0.457387	325050	0.59	0.048273	0.019469	0.013175	63001	0.6	0.055483	0.050629	0.27308	89860	0.61	0.0223	0.0151	0.1401	4265	0.52	0.127233	0.114812	0.267783	3236	0.61	0.304543	0.155656	0.050406	2063	0.66	-0.09624	0.149714	0.520317	2091	0.67	-0.05026	0.094842	0.596164	6065	0.65	-0.06433	0.067789
DQA1_50_Ref	29687	0.63	0.021472	0.024516	0.381125	7143	0.65	0.037939	0.051052	0.457387	325050	0.59	0.048273	0.019469	0.013175	63001	0.6	0.055483	0.050629	0.27308	89860	0.61	0.0223	0.0151	0.1401	4265	0.52	0.127233	0.114812	0.267783	3236	0.61	0.304543	0.155656	0.050406	2063	0.66	-0.09624	0.149714	0.520317	2091	0.67	-0.05026	0.094842	0.596164	6065	0.65	-0.06433	0.067789
DQA1_56_Ref	29687	0.63	0.021472	0.024516	0.381125	7143	0.65	0.037939	0.051052	0.457387	325050	0.59	0.048273	0.019469	0.013175	63001	0.6	0.055483	0.050629	0.27308	89860	0.61	0.0223	0.0151	0.1401	4265	0.52	0.127233	0.114812	0.267783	3236	0.61	0.304543	0.155656	0.050406	2063	0.66	-0.09624	0.149714	0.520317	2091	0.67	-0.05026	0.094842	0.596164	6065	0.65	-0.06433	0.067789
DQA1_48_Ref	29687	0.63	0.021472	0.024516	0.381125	7143	0.65	0.037939	0.051052	0.457387	325050	0.59	0.048273	0.019469	0.013175	63001	0.6	0.055483	0.050629	0.27308	89860	0.61	0.0223	0.0151	0.1401	4265	0.52	0.127233	0.114812	0.267783	3236	0.61	0.304543	0.155656	0.050406	2063	0.66	-0.09624	0.149714	0.520317	2091	0.67	-0.05026	0.094842	0.596164	6065	0.65	-0.06433	0.067789
DQA1_69_Ref	29687	0.63	0.021472	0.024516	0.381125	7143	0.65	0.037939	0.051052	0.457387	325050	0.59	0.048273	0.019469	0.013175	63001	0.6	0.055483	0.050629	0.27308	89860	0.61	0.0223	0.0151	0.1401	4265	0.52	0.127233	0.114812	0.267783	3236	0.61	0.304543	0.155656	0.050406	2063	0.66	-0.09624	0.149714	0.520317	2091	0.67	-0.05026	0.094842	0.596164	6065	0.65	-0.06433	0.067789
DQA1_55_Ref	29687	0.63	0.021472	0.024516	0.381125	7143	0.65	0.037939	0.051052	0.457387	325050	0.59	0.048273	0.019469	0.013175	63001	0.6	0.055483	0.050629	0.27308	89860	0.61	0.0223	0.0151	0.1401	4265	0.52	0.127233	0.114812	0.267783	3236	0.61	0.304543	0.155656	0.050406	2063	0.66	-0.09624	0.149714	0.520317	2091	0.67	-0.05026	0.094842	0.596164	6065	0.65	-0.06433	0.067789
DQA1_47_Ref	29687	0.63	0.021472	0.024516	0.381125	7143	0.65	0.037939	0.051052	0.457387	325050	0.59	0.048273	0.019469	0.013175	63001	0.6	0.055483	0.050629	0.27308	89860	0.61	0.0223	0.0151	0.1401	4265	0.52	0.127233	0.114812	0.267783	3236	0.61	0.304543	0.155656	0.050406	2063	0.66	-0.09624	0.149714	0.520317	2091	0.67	-0.05026	0.094842	0.596164	6065	0.65	-0.06433	0.067789
DQA1_76_Ref	29687	0.63	0.021472	0.024516	0.381125	7143	0.65	0.037939	0.051052	0.457387	325050	0.59	0.048273	0.019469	0.013175	63001	0.6	0.055483	0.050629	0.27308	89860	0.61	0.0223	0.0151	0.1401	4265	0.52	0.127233	0.114812	0.267783	3236	0.61	0.304543	0.155656	0.050406	2063	0.66	-0.09624	0.149714	0.520317	2091	0.67	-0.05026	0.094842	0.596164	6065	0.65	-0.06433	0.067789
DQA1_53_Ref	29687	0.63	0.021472	0.024516	0.381125	7143	0.65	0.037939	0.051052	0.457387	325050	0.59	0.048273	0.019469	0.013175	63001	0.6	0.055483	0.050629	0.27308	89860	0.61	0.0223	0.0151	0.1401	4265	0.52	0.127233	0.114812	0.267783	3236	0.61	0.304543	0.155656	0.050406	2063	0.66	-0.09624	0.149714	0.520317	2091	0.67	-0.05026	0.094842	0.596164	6065	0.65	-0.06433	0.067789
DQA1_66_Ref	29687	0.63	0.021472	0.024516	0.381125	7143	0.65	0.037939	0.051052	0.457387	325050	0.59	0.048273	0.019469	0.013175	63001	0.6	0.055483	0.050629	0.27308	89860	0.61	0.0223	0.0151	0.1401	4265	0.52	0.127233	0.114812	0.267783	3236	0.61	0.304543	0.155656	0.050406	2063	0.66	-0.09624	0.149714	0.520317	2091	0.67	-0.05026	0.094842	0.596164	6065	0.65	-0.06433	0.067789
DQA1_18_Ref	29687	0.63	0.021472	0.024516	0.381125	7143	0.65	0.037939	0.051052	0.457387	325050	0.59	0.048273	0.019469	0.013175	63001	0.6	0.055483	0.050629	0.27308	89860	0.61	0.0223	0.0151	0.1401	4265	0.52	0.127233	0.114812	0.267783	3236	0.61	0.304543	0.155656	0.050406	2063	0.66	-0.09624	0.149714	0.520317	2091	0.67	-0.05026	0.094842	0.596164	6065	0.65	-0.06433	0.067789
DQA1_61_Ref	29687	0.63	0.021472	0.024516	0.381125	7143	0.65	0.037939	0.051052	0.457387	325050	0.59	0.048273	0.019469	0.013175	63001	0.6	0.055483	0.050629	0.27308	89860	0.61	0.0223	0.0151	0.1401	4265	0.52	0.127233	0.114812	0.267783	3236	0.61	0.304543	0.155656	0.050406	2063	0.66	-0.09624	0.149714	0.520317	2091	0.67	-0.05026	0.094842	0.596164	6065	0.65	-0.06433	0.067789
DQA1_52_Ref	29687	0.63	0.021472	0.024516	0.381125	7143	0.65	0.037939	0.051052	0.457387	325050	0.59	0.048273	0.019469	0.013175	63001	0.6	0.055483	0.050629	0.27308	89860	0.61	0.0223	0.0151	0.1401	4265	0.52	0.127233	0.114812	0.267783	3236	0.61	0.304543	0.155656	0.050406	2063	0.66	-0.09624	0.149714	0.520317	2091	0.67	-0.05026	0.094842	0.596164	6065	0.65	-0.06433	0.067789
DQA1_80_Ref	29687	0.63	0.021472	0.024516	0.381125	7143	0.65	0.037939	0.051052	0.457387	325050	0.59	0.048273	0.019469	0.013175	63001	0.6	0.055483	0.050629	0.27308	89860	0.61	0.0223	0.0151	0.1401	4265	0.52	0.127233	0.114812	0.267783	3236	0.61	0.304543	0.155656	0.050406	2063	0.66	-0.09624	0.149714	0.520317	2091	0.67	-0.05026	0.094842	0.596164	6065	0.65	-0.06433	0.067789
DQA1_11_Ref	29687	0.63	0.021472	0.024516	0.381125	7143	0.65	0.037939	0.051052	0.457387	325050	0.59	0.048273	0.019469	0.013175	63001	0.6	0.055483	0.050629	0.27308	89860	0.61	0.0223	0.0151	0.1401	4265	0.52	0.127233	0.114812	0.267783	3236	0.61	0.304543	0.155656	0.050406	2063	0.66	-0.09624	0.149714	0.520317	2091	0.67	-0.05026	0.094842	0.596164	6065	0.65	-0.06433	0.067789
DQA1_45_Ref	29687	0.63	0.021472	0.024516	0.381125	7143	0.65	0.037939	0.051052	0.457387	325050	0.59	0.048273	0.019469	0.013175	63001	0.6	0.055483	0.050629	0.27308	89860	0.61	0.0223	0.0151	0.1401	4265	0.52	0.127233	0.114812	0.267783	3236	0.61	0.304543	0.155656	0.050406	2063	0.66	-0.09624	0.149714	0.520317	2091	0.67	-0.05026	0.094842	0.596164	6065	0.65	-0.06433	0.067789
DQB1_77_Ref	29687	0.46	0.046395	0.024848	0.061882	7143	0.59	0.12689	0.04952	0.010395	325050	0.48	0.018593	0.019108	0.330592	63001	0.46	-0.06555	0.04966	0.186848	90188	0.47	0.0279	0.0147	0.05756	4265	0.35	0.002058	0.119715	0.986285	3236	0.4	0.20961	0.152865	0.170311	2056	0.42	0.152173	0.144441	0.292098	2091	0.46	0.002861	0.089681	0.974552	6070	0.16	0.06656	0.070219
DRB1_67_Ref	29687	0.65	-0.00558	0.025107	0.824039	7143	0.66	-0.12827	0.05188	0.013419	325050	0.73	-0.06533	0.021298	0.00216	63001	0.63	-0.12284	0.051913	0.017964	82424	0.65	-0.0145	0.0161	0.3684	4265	0.65	-0.05271	0.119042	0.657899	3236	0.62	0.095541	0.153941	0.534838	2057	0.46	0.304944	0.143242	0.033265	2091	0.47	-0.10498	0.089644	0.241566	5927	0.57	0.137248	0.05526
DQB1_30_Ref	29687	0.47	0.017861	0.023579	0.448733	7143	0.46	0.0743	0.048989	0.129349	325050	0.4	0.043171	0.019436	0.026324	63001	0.44	-0.06384	0.050228	0.203759	90188	0.49	0.0278	0.0147	0.05904	4265	0.4	0.019693	0.11614	0.865351	3236	0.47	0.372171	0.150376	0.013326	2063	0.41	0.018507	0.144252	0.897916	2091	0.44	-0.00026	0.090023	0.997688	6070	0.38	-0.00763	0.061033
DQB1_57_D	29687	0.74	0.018332	0.027229	0.500775	7143	0.75	-0.06155	0.055864	0.270516	325050	0.72	0.038016	0.021397	0.075659	63001	0.75	0.085027	0.057197	0.137087	90188	0.73	0.026	0.0166	0.1169	4265	0.76	0.066849	0.13073	0.609106	3236	0.72	-0.00625	0.167549	0.970234	2063	0.68	0.258019	0.150524	0.086502	2091	0.64	0.113621	0.093304	0.223318	6070	0.93	0.028462	0.104633
DQA1_26_Ref	29687	0.88	0.070434	0.036369	0.052787	7143	0.97	0.199295	0.136745	0.145001	325050	0.9	0.068919	0.031604	0.029191	63001	0.88	-0.06051	0.077842	0.436953	89860	0.89	0.0434	0.0233	0.06264	4265	0.86	0.227616	0.162605	0.16157	3236	0.9	0.125449	0.255743	0.62376	829	0.92	-0.5111	0.34431	0.137698	2091	0.91	0.011375	0.157194	0.942314	6065	0.74	-0.12124	0.068118
DRB1_57_Ref	29687	0.94	0.01283	0.050808	0.800645	7143	0.95	-0.18446	0.108064	0.087829	325050	0.95	-0.02893	0.04221	0.493096	63001	0.93	-0.17159	0.101986	0.092474	82424	0.94	-0.08	0.032	0.01231	4265	0.95	0.10745	0.241144	0.655898	3236	0.93	-0.03078	0.297499	0.917583	2062	0.93	-0.14529	0.276468	0.599222	2091	0.93	0.271228	0.178881	0.129456	5927	0.78	-0.10846	0.068437
DQB1_55_P	29687	0.56	-0.01446	0.023941	0.54586	7143	0.56	-0.09182	0.049217	0.062105	325050	0.56	-0.04798	0.019212	0.012511	63001	0.54	0.010691	0.049923	0.83034	90188	0.55	-0.0191	0.0147	0.1955	4265	0.64	0.036788	0.117697	0.754614	3236	0.53	-0.18147	0.150287	0.227243	2057	0.19	0.283392	0.180479	0.116363	2091	0.24	-0.0416	0.104944	0.691784	6070	0.59	-0.00742	0.05789
DQB1_86_E	29687	0.73	-0.01037	0.02668	0.697622	7143	0.83	-0.11331	0.06444	0.078674	325050	0.75	-0.06647	0.022039	0.00256	63001	0.72	-0.00097	0.055466	0.986048	90188	0.73	-0.0196	0.0164	0.2325	4265	0.8	0.046577	0.138665	0.736951	3236	0.73	-0.12125	0.168172	0.470909	2063	0.47	0.182404	0.14203	0.19905	2091	0.47	-0.06087	0.089748	0.497628	6070	0.77	0.135026	0.073818
DQB1_90_T	29687	0.73	-0.01037	0.02668	0.697622	7143	0.83	-0.11331	0.06444	0.078674	325050	0.75	-0.06647	0.022039	0.00256	63001	0.72	-0.00097	0.055466	0.986048	90188	0.73	-0.0196	0.0164	0.2325	4265	0.8	0.046577	0.138665	0.736951	3236	0.73	-0.12125	0.168172	0.470909	2063	0.47	0.182404	0.14203	0.19905	2091	0.47	-0.06087	0.089748	0.497628	6070	0.77	0.135026	0.073818
DQB1_84_Q	29687	0.73	-0.01037	0.02668	0.697622	7143	0.83	-0.11331	0.06444	0.078674	325050	0.75	-0.06647	0.022039	0.00256	63001	0.72	-0.00097	0.055466	0.986048	90188	0.73	-0.0196	0.0164	0.2325	4265	0.8	0.046577	0.138665	0.736951	3236	0.73	-0.12125	0.168172	0.470909	2063	0.47	0.182404	0.14203	0.19905	2091	0.47	-0.06087	0.089748	0.497628	6070	0.77	0.135026	0.073818
DQB1_53_L	29687	0.73	-0.01037	0.02668	0.697622	7143	0.83	-0.11331	0.06444	0.078674	325050	0.75	-0.06647	0.022039	0.00256	63001	0.72	-0.00097	0.055466	0.986048	90188	0.73	-0.0196	0.0164	0.2325	4265	0.8	0.046577	0.138665	0.736951	3236	0.73	-0.12125	0.168172	0.470909	2063	0.47	0.182404	0.14203	0.19905	2091	0.47	-0.06087	0.089748	0.497628	6070	0.77	0.135026	0.073818
DQB1_85_L	29687	0.73	-0.01037	0.02668	0.697622	7143	0.83	-0.11331	0.06444	0.078674	325050	0.75	-0.06647	0.022039	0.00256	63001	0.72	-0.00097	0.055466	0.986048	90188	0.73	-0.0196	0.0164	0.2325	4265	0.8	0.046577	0.138665	0.736951	3236	0.73	-0.12125	0.168172	0.470909	2063	0.47	0.182404	0.14203	0.19905	2091	0.47	-0.06087	0.089748	0.497628	6070	0.77	0.135026	0.073818
DQB1_89_T	29687	0.73	-0.01037	0.02668	0.697622	7143	0.83	-0.11331	0.06444	0.078674	325050	0.75	-0.06647	0.022039	0.00256	63001	0.72	-0.00097	0.055466	0.986048	90188	0.73	-0.0196	0.0164	0.2325	4265	0.8	0.046577	0.138665	0.736951	3236	0.73	-0.12125	0.168172	0.470909	2063	0.47	0.182404	0.14203	0.19905	2091	0.47	-0.06087	0.089748	0.497628	6070	0.77	0.135026	0.073818
DQB1_87_L	29687	0.73	-0.01037	0.02668	0.697622	7143	0.83	-0.11331	0.06444	0.078674	325050	0.75	-0.06647	0.022039	0.00256	63001	0.72	-0.00097	0.055466	0.986048	90188	0.73	-0.0196	0.0164	0.2325	4265	0.8	0.046577	0.138665	0.736951	3236	0.73	-0.12125	0.168172	0.470909	2063	0.47	0.182404	0.14203	0.19905	2091	0.47	-0.06087	0.089748	0.497628	6070	0.77	0.135026	0.073818
DRB1_78_Ref	29687	0.98	-0.06431	0.077188	0.404757	7143	0.98	-0.14964	0.170771	0.380894	325050	0.97	0.032967	0.061098	0.589583	63001	0.98	-0.1488	0.162317	0.359295	82424	0.98	-0.1298	0.0502	0.009718	4265	0.98	-0.22951	0.391236	0.557448	3236	0.98	-0.29627	0.493369	0.548166	2061	0.98	0.060979	0.4456	0.891152	2091	0.98	0.04411	0.334497	0.895088	5927	0.97	-0.05564	0.148123
DQB1_70_R	29687	0.76	0.010278	0.027611	0.709707	7143	0.85	-0.07866	0.067982	0.247253	325050	0.78	-0.05672	0.02276	0.012702	63001	0.76	-0.0236	0.058032	0.684293	90188	0.75	-0.0259	0.0168	0.1235	4265	0.77	-0.0501	0.131547	0.70333	3236	0.7	-0.28805	0.162868	0.07696	2063	0.39	0.018054	0.146052	0.901622	2091	0.45	-0.0106	0.09037	0.906591	6070	0.86	-0.004	0.076605
DRB1_32_H	29687	0.47	-0.04442	0.024982	0.075399	7143	0.48	-0.01021	0.048719	0.834023	325050	0.48	-0.00741	0.019096	0.69818	63001	0.51	-0.11528	0.049519	0.019909	82424	0.51	-0.0253	0.0154	0.1003	4265	0.48	-0.05819	0.112975	0.606535	3236	0.55	0.152993	0.150473	0.309275	2063	0.54	0.010194	0.143166	0.943234	2091	0.55	0.196197	0.089985	0.029233	5927	0.37	-0.09901	0.064062
DRB1_37_N	29687	0.41	-0.06374	0.025895	0.013836	7143	0.41	-0.03246	0.049587	0.512748	325050	0.44	-0.00734	0.019222	0.70246	63001	0.42	-0.07847	0.050229	0.11821	82424	0.45	-0.028	0.0155	0.07032	4265	0.41	-0.00107	0.114525	0.992536	3236	0.47	0.107664	0.149692	0.471994	2063	0.5	-0.09014	0.142238	0.526267	2091	0.5	0.1593	0.089422	0.074841	5927	0.48	-0.00105	0.057855
DRB1_11_P	29687	0.29	0.057724	0.026046	0.026677	7143	0.29	0.017672	0.05386	0.742837	325050	0.29	0.046163	0.021048	0.028311	63001	0.31	0.068358	0.053798	0.203895	82424	0.29	0.0041	0.017	0.8086	4265	0.24	0.233261	0.132208	0.077673	3236	0.24	-0.06322	0.175324	0.718386	2056	0.32	0.041784	0.154075	0.786243	2091	0.31	0.005291	0.096873	0.956445	5927	0.34	-0.17013	0.075354
DRB1_13_R	29687	0.29	0.057724	0.026046	0.026677	7143	0.29	0.017672	0.05386	0.742837	325050	0.29	0.046163	0.021048	0.028311	63001	0.31	0.068358	0.053798	0.203895	82424	0.29	0.0041	0.017	0.8086	4265	0.24	0.233261	0.132208	0.077673	3236	0.24	-0.06322	0.175324	0.718386	2056	0.32	0.041784	0.154075	0.786243	2091	0.31	0.005291	0.096873	0.956445	5927	0.34	-0.17013	0.075354
DRB1_71_E	29687	0.24	-0.04077	0.027299	0.135264	7143	0.23	0.002457	0.058526	0.96651	325050	0.2	0.003217	0.023775	0.892258	63001	0.23	-0.0029	0.059038	0.96086	82424	0.26	-0.0473	0.0177	0.00738	4265	0.24	0.024849	0.131057	0.849621	3236	0.34	0.200937	0.158735	0.205563	2062	0.28	-0.24753	0.155843	0.112212	2091	0.34	0.094728	0.09408	0.31399	5927	0.18	-0.15035	0.112157
DRB1_71_A	29687	0.26	0.048181	0.027096	0.075375	7143	0.27	-0.01129	0.055449	0.838608	325050	0.28	0.043817	0.021278	0.039445	63001	0.28	0.093099	0.055373	0.092708	82424	0.25	0.0119	0.0179	0.5068	4265	0.18	0.16634	0.143824	0.247455	3236	0.2	-0.19732	0.187782	0.293366	2056	0.31	0.01999	0.156571	0.898407	2091	0.28	0.001268	0.099263	0.989806	5927	0.32	-0.17861	0.077596
DQA1_41_K	29687	0.14	-0.0667	0.033643	0.047408	7143	0.13	0.027771	0.073393	0.70514	325050	0.11	0.019207	0.030842	0.533439	63001	0.15	-0.04458	0.072733	0.539924	89860	0.15	-0.0532	0.0209	0.01095	4265	0.12	0.023407	0.168473	0.889502	3236	0.17	0.290493	0.198241	0.142824	2052	0.08	-0.32116	0.258394	0.213902	2091	0.08	0.099284	0.161426	0.538526	6065	0.34	-0.01544	0.071083
DRB1_86_Ref	29687	0.79	0.014963	0.02902	0.606121	7143	0.79	0.067954	0.060179	0.258815	325050	0.79	0.011268	0.023672	0.634111	63001	0.78	0.046359	0.05943	0.435395	82424	0.79	0.0456	0.0191	0.01683	4265	0.84	0.122146	0.152481	0.4231	3236	0.81	-0.0596	0.188363	0.751672	2063	0.73	-0.41154	0.163027	0.01159	2091	0.75	-0.09195	0.102607	0.37019	5927	0.93	0.05151	0.100246
DRB1_14_Ref	29687	0.98	-0.07362	0.082889	0.374443	7143	0.98	-0.12666	0.183322	0.489624	325050	0.98	0.019089	0.065854	0.77194	63001	0.98	-0.05012	0.170617	0.768945	81908	0.98	-0.1253	0.0536	0.01937	4265	0.99	0.24648	0.451015	0.584722	3236	0.98	-0.4563	0.532243	0.391275	2062	0.96	0.038401	0.363288	0.915816	2091	0.98	-0.44259	0.290232	0.127269	5927	1	12.5312	186.986
DRB1_60_Ref	29687	0.96	-0.00054	0.062066	0.993102	7143	0.97	-0.096	0.133355	0.471575	325050	0.96	-0.0156	0.049599	0.753069	63001	0.96	-0.12568	0.122655	0.305523	82424	0.96	-0.105	0.0392	0.007349	4265	0.97	0.089277	0.309223	0.772799	3236	0.96	-0.07253	0.397224	0.855124	2062	0.97	0.160549	0.374931	0.668499	2091	0.97	-0.02992	0.251955	0.905465	5927	0.94	0.201256	0.116414
DRB1_78_V	29687	0.27	0.008781	0.026379	0.739241	7143	0.27	0.040018	0.055091	0.467598	325050	0.29	0.020039	0.020921	0.338023	63001	0.28	0.134195	0.054621	0.01402	82424	0.28	0.0256	0.0172	0.1361	4265	0.25	-0.08325	0.129045	0.518831	3236	0.27	-0.01436	0.169868	0.932616	2061	0.22	-0.04314	0.167937	0.797288	2091	0.23	-0.06419	0.106126	0.545263	5927	0.28	-0.0291	0.060985
DRB1_32_Ref	29687	0.92	-0.00812	0.043775	0.852928	7143	0.92	0.077011	0.090594	0.395286	325050	0.92	-0.01239	0.035325	0.725741	63001	0.9	0.136009	0.087713	0.121006	82424	0.91	0.0722	0.0271	0.007645	4265	0.92	0.180417	0.210739	0.391934	3236	0.9	-0.0855	0.243346	0.725324	2063	0.88	-0.01448	0.213885	0.946023	2091	0.88	-0.04942	0.138053	0.720354	5927	0.95	0.091636	0.123759
DRB1_25_Ref	29687	0.98	-0.07871	0.08337	0.345134	7143	0.98	-0.12666	0.183322	0.489624	325050	0.98	0.021919	0.066253	0.74078	63001	0.98	-0.02674	0.178397	0.88084	81908	0.98	-0.1323	0.0541	0.01448	4265	0.99	0.152801	0.458617	0.739001	3236	0.98	-0.56448	0.545573	0.300831	2061	0.98	-0.32965	0.561868	0.557397	2091	0.99	0.303656	0.448142	0.498032	5927	1	12.5312	186.986
DRB1_26_F	29687	0.93	-0.09365	0.045511	0.039616	7143	0.92	-0.10818	0.091023	0.234625	325050	0.91	-0.00902	0.033029	0.784754	63001	0.92	-0.03646	0.091733	0.691	82424	0.92	-0.0265	0.0279	0.342	4265	0.97	0.162863	0.315618	0.605844	3236	0.94	-0.10616	0.323604	0.74288	2063	0.94	-0.40387	0.291515	0.165929	2091	0.94	-0.24929	0.187117	0.182778	5927	0.92	0.048487	0.095747
DRB1_70_Ref	29687	0.75	-0.00419	0.028102	0.881535	7143	0.77	-0.15166	0.059146	0.010343	325050	0.84	-0.02806	0.025867	0.278099	63001	0.74	-0.07367	0.058689	0.209396	82424	0.74	-0.0121	0.0178	0.4983	4265	0.7	0.102369	0.122286	0.402517	3236	0.69	-0.03194	0.161258	0.843006	2063	0.65	0.230029	0.14803	0.1202	2091	0.63	-0.20193	0.092903	0.02974	5927	0.72	0.040987	0.063199
DQB1_9_Ref	29687	0.91	-0.00256	0.041825	0.951181	7143	0.96	-0.09384	0.132054	0.477304	325050	0.91	-0.04349	0.033248	0.190837	63001	0.89	-0.07432	0.080594	0.356416	90188	0.92	-0.0483	0.0263	0.06697	4265	0.91	-0.0014	0.1945	0.994262	3236	0.89	0.161658	0.244093	0.507793	2063	0.66	0.176298	0.154726	0.254529	2091	0.72	0.106094	0.099757	0.28754	6070	0.79	-0.02847	0.067405
DRB1_95_Ref	0					0					325050	0.02	-0.07828	0.066549	0.239488	63001	0.03	0.003677	0.152792	0.980766	80198	0.01	-0.1881	0.076	0.01327	0					0					0					2091	0.17	0.064303	0.119111	0.589297	0
DRB1_5_Ref	0					0					325050	0.02	-0.07828	0.066549	0.239488	63001	0.03	0.003677	0.152792	0.980766	80198	0.01	-0.1881	0.076	0.01327	0					0					0					2091	0.17	0.064303	0.119111	0.589297	0
DQB1_14_M	29687	0.92	-0.04329	0.043955	0.324676	7143	0.97	-0.08751	0.143494	0.541962	325050	0.93	-0.0228	0.038328	0.55187	63001	0.92	-0.00941	0.09263	0.919112	90188	0.91	-0.0492	0.0263	0.06201	4265	0.93	0.02644	0.210319	0.899958	3236	0.91	-0.06648	0.25569	0.794855	2063	0.8	0.104423	0.176395	0.553861	2091	0.79	0.089417	0.109539	0.414329	6070	0.99	-0.09401	0.215084
DQB1_9_F	29687	0.28	0.002268	0.026658	0.932193	7143	0.29	-0.0212	0.054559	0.697542	325050	0.3	0.035051	0.020695	0.090299	63001	0.27	0.063792	0.056212	0.256427	90188	0.28	0.0145	0.0167	0.3853	4265	0.33	0.198682	0.12162	0.102338	3236	0.32	-0.25521	0.160872	0.112641	2063	0.53	0.129777	0.143627	0.366224	2091	0.47	0.05423	0.089573	0.544897	6070	0.42	0.046037	0.053759
DRB1_31_F	29687	0.98	-0.17229	0.08597	0.045064	7143	0.98	0.094607	0.184572	0.608247	325050	0.98	0.052349	0.069505	0.451303	63001	0.98	0.039252	0.197206	0.842196	82424	0.98	-0.0752	0.0535	0.1597	4265	0.99	-0.07538	0.526071	0.886058	3236	0.99	-0.14456	0.664647	0.827825	2063	0.98	0.080049	0.479504	0.867417	2091	0.98	-0.12174	0.298153	0.683034	5927	0.94	-0.15075	0.115546
DQB1_16_Ref	0					0					325050	0.98	0.00094	0.075628	0.990139	63001	0.98	-0.09902	0.177842	0.577689	90188	0.98	-0.1084	0.0532	0.04166	0					0					0					0					6070	1	-0.03583	0.633237
DQB1_17_Ref	0					0					325050	0.98	0.00094	0.075628	0.990139	63001	0.98	-0.09902	0.177842	0.577689	90188	0.98	-0.1084	0.0532	0.04166	0					0					0					0					6070	1	-0.03583	0.633237
DQB1_20_Ref	0					0					325050	0.98	0.00094	0.075628	0.990139	63001	0.98	-0.09902	0.177842	0.577689	90188	0.98	-0.1084	0.0532	0.04166	0					0					0					0					6070	1	-0.03583	0.633237
DQB1_80_Ref	0					0					325050	0.98	0.00094	0.075628	0.990139	63001	0.98	-0.09902	0.177842	0.577689	90188	0.98	-0.1084	0.0532	0.04166	0					0					0					0					6070	1	-0.03583	0.633237
DQB1_73_Ref	0					0					325050	0.98	0.00094	0.075628	0.990139	63001	0.98	-0.09902	0.177842	0.577689	90188	0.98	-0.1084	0.0532	0.04166	0					0					0					0					6070	1	-0.03583	0.633237
DQB1_15_Ref	0					0					325050	0.98	0.00094	0.075628	0.990139	63001	0.98	-0.09902	0.177842	0.577689	90188	0.98	-0.1084	0.0532	0.04166	0					0					0					0					6070	1	-0.03583	0.633237
DQB1_18_Ref	0					0					325050	0.98	0.00094	0.075628	0.990139	63001	0.98	-0.09902	0.177842	0.577689	90188	0.98	-0.1084	0.0532	0.04166	0					0					0					0					6070	1	-0.03583	0.633237
DQB1_78_Ref	0					0					325050	0.98	0.00094	0.075628	0.990139	63001	0.98	-0.09902	0.177842	0.577689	90188	0.98	-0.1084	0.0532	0.04166	0					0					0					0					6070	1	-0.03583	0.633237
DQB1_79_Ref	0					0					325050	0.98	0.00094	0.075628	0.990139	63001	0.98	-0.09902	0.177842	0.577689	90188	0.98	-0.1084	0.0532	0.04166	0					0					0					0					6070	1	-0.03583	0.633237
DQB1_19_Ref	0					0					325050	0.98	0.00094	0.075628	0.990139	63001	0.98	-0.09902	0.177842	0.577689	90188	0.98	-0.1084	0.0532	0.04166	0					0					0					0					6070	1	-0.03583	0.633237
DQB1_76_Ref	0					0					325050	0.98	0.00094	0.075628	0.990139	63001	0.98	-0.09902	0.177842	0.577689	90188	0.98	-0.1084	0.0532	0.04166	0					0					0					0					6070	1	-0.03583	0.633237
DQB1_72_Ref	0					0					325050	0.98	0.00094	0.075628	0.990139	63001	0.98	-0.09902	0.177842	0.577689	90188	0.98	-0.1084	0.0532	0.04166	0					0					0					0					6070	1	-0.03583	0.633237
DQA1_25_Ref	29687	0.81	-0.06524	0.030237	0.030946	7143	0.96	-0.22296	0.120044	0.063268	325050	0.83	-0.0065	0.025474	0.79848	63001	0.77	-0.05109	0.061291	0.404531	89860	0.8	-0.0152	0.0185	0.4087	4265	0.82	0.153183	0.145296	0.291752	3236	0.82	-0.03647	0.191742	0.849132	2062	0.84	0.056169	0.1892	0.766559	2091	0.81	0.011151	0.114885	0.92268	6065	0.78	-0.03317	0.064981
DRB1_60_S	29687	0.3	0.018527	0.025537	0.468133	7143	0.3	0.063496	0.053065	0.231475	325050	0.32	0.009696	0.020478	0.635668	63001	0.31	0.103286	0.053	0.051334	82424	0.31	0.0178	0.0167	0.2872	4265	0.28	-0.13922	0.124814	0.264669	3236	0.32	-0.10653	0.161267	0.508881	2062	0.28	0.081483	0.155457	0.600175	2091	0.3	0.064372	0.097498	0.5091	5927	0.36	-0.04132	0.057435
DRB1_57_V	29687	0.3	0.018527	0.025537	0.468133	7143	0.3	0.063496	0.053065	0.231475	325050	0.32	0.009696	0.020478	0.635668	63001	0.31	0.103286	0.053	0.051334	82424	0.31	0.0178	0.0167	0.2872	4265	0.28	-0.13922	0.124814	0.264669	3236	0.32	-0.10653	0.161267	0.508881	2062	0.28	0.081483	0.155457	0.600175	2091	0.3	0.064372	0.097498	0.5091	5927	0.36	-0.04132	0.057435
DQA1_34_Q	29687	0.66	-0.04474	0.025441	0.078671	7143	0.79	-0.00658	0.059451	0.911897	325050	0.66	0.023007	0.020201	0.254855	63001	0.68	-0.07103	0.052985	0.180039	89860	0.66	-0.0292	0.0155	0.05949	4265	0.66	0.140922	0.118796	0.235522	3236	0.67	0.00142	0.159898	0.992915	2063	0.83	-0.10913	0.183329	0.551665	2091	0.78	0.20432	0.108557	0.059817	6065	0.69	-0.14587	0.064499
DRB1_8_Ref	0					0					325050	1				63001	1	3.70247	2.90584	0.202612	0					0					0					0					2091	1	-1.78999	0.834707	0.031997	5927	1	11.5066	138.774
DRB1_15_Ref	0					0					325050	1				63001	1	3.70247	2.90584	0.202612	0					0					0					0					2091	1	-1.78999	0.834707	0.031997	5927	1	11.5066	138.774
DRB1_17_Ref	0					0					325050	1				63001	1	3.70247	2.90584	0.202612	0					0					0					0					2091	1	-1.78999	0.834707	0.031997	5927	1	11.5066	138.774
DRB1_11_G	29687	0.25	-0.00118	0.026958	0.964942	7143	0.25	0.059374	0.056483	0.293172	325050	0.27	0.019267	0.021423	0.368669	63001	0.25	0.139425	0.056037	0.012842	82424	0.27	0.0227	0.0176	0.1977	4265	0.23	-0.10528	0.132079	0.425386	3236	0.25	0.010251	0.172837	0.952706	2061	0.18	0.039712	0.182994	0.828197	2091	0.18	-0.29036	0.11657	0.012743	0
DRB1_74_Q	29687	0.25	-0.00118	0.026958	0.964942	7143	0.25	0.059374	0.056483	0.293172	325050	0.27	0.019267	0.021423	0.368669	63001	0.25	0.139425	0.056037	0.012842	82424	0.27	0.0227	0.0176	0.1977	4265	0.23	-0.10528	0.132079	0.425386	3236	0.25	0.010251	0.172837	0.952706	2061	0.18	0.039712	0.182994	0.828197	2091	0.18	-0.29036	0.11657	0.012743	0
DRB1_13_Y	29687	0.25	-0.00118	0.026958	0.964942	7143	0.25	0.059374	0.056483	0.293172	325050	0.27	0.019267	0.021423	0.368669	63001	0.25	0.139425	0.056037	0.012842	82424	0.27	0.0227	0.0176	0.1977	4265	0.23	-0.10528	0.132079	0.425386	3236	0.25	0.010251	0.172837	0.952706	2061	0.18	0.039712	0.182994	0.828197	2091	0.18	-0.29036	0.11657	0.012743	0
DRB1_30_L	29687	0.25	-0.00118	0.026958	0.964942	7143	0.25	0.059374	0.056483	0.293172	325050	0.27	0.019267	0.021423	0.368669	63001	0.25	0.139425	0.056037	0.012842	82424	0.27	0.0227	0.0176	0.1977	4265	0.23	-0.10528	0.132079	0.425386	3236	0.25	0.010251	0.172837	0.952706	2061	0.18	0.039712	0.182994	0.828197	2091	0.18	-0.29036	0.11657	0.012743	0
DRB1_14_K	29687	0.25	-0.00118	0.026958	0.964942	7143	0.25	0.059374	0.056483	0.293172	325050	0.27	0.019267	0.021423	0.368669	63001	0.25	0.139425	0.056037	0.012842	82424	0.27	0.0227	0.0176	0.1977	4265	0.23	-0.10528	0.132079	0.425386	3236	0.25	0.010251	0.172837	0.952706	2061	0.18	0.039712	0.182994	0.828197	2091	0.18	-0.29036	0.11657	0.012743	0
DRB1_25_Q	29687	0.25	-0.00118	0.026958	0.964942	7143	0.25	0.059374	0.056483	0.293172	325050	0.27	0.019267	0.021423	0.368669	63001	0.25	0.139425	0.056037	0.012842	82424	0.27	0.0227	0.0176	0.1977	4265	0.23	-0.10528	0.132079	0.425386	3236	0.25	0.010251	0.172837	0.952706	2061	0.18	0.039712	0.182994	0.828197	2091	0.18	-0.29036	0.11657	0.012743	0
DQB1_94_Ref	0					0					325050	0.93	-0.02383	0.037915	0.529625	63001	0.9	0.01546	0.086329	0.857852	90188	0.91	-0.0426	0.0258	0.0987	0					0					0					0					6070	0.91	0.021529	0.097527
DRB1_37_F	29687	0.29	0.008872	0.02568	0.729737	7143	0.29	0.013262	0.053506	0.804248	325050	0.31	0.024944	0.020625	0.226567	63001	0.31	0.112704	0.05338	0.034746	82424	0.32	0.0206	0.0167	0.2163	4265	0.27	-0.18941	0.12645	0.134157	3236	0.28	0.070601	0.166699	0.671915	2061	0.18	0.039712	0.182994	0.828197	2091	0.18	-0.29036	0.11657	0.012743	5927	0.05	-0.12377	0.122144
DQB1_37_D	29687	0.02	0.174335	0.089021	0.050188	7143	0.02	0.250782	0.183304	0.171274	0					63001	0.06	0.084106	0.129005	0.514458	89621	0.02	0.0064	0.0624	0.9181	4265	0.03	0.139307	0.314508	0.657811	3236	0.03	-0.08627	0.446807	0.846892	0					0					6070	0.33	0.019684	0.072487
DRB1_70_R	29687	0.09	0.069803	0.041761	0.094619	7143	0.09	-0.08471	0.084211	0.314466	325050	0.08	0.027017	0.035167	0.442314	63001	0.12	-0.08702	0.082991	0.294407	82424	0.1	0.0371	0.0255	0.1454	4265	0.1	-0.20532	0.189296	0.278083	3236	0.09	0.143594	0.250281	0.56615	2062	0.09	-0.26294	0.243645	0.280508	2091	0.1	0.385068	0.151713	0.011145	5927	0.32	-0.05896	0.058295
DRB1_7_Ref	0					0					325050	1	-2.1215	0.7893	0.007192	63001	1	4.15334	2.01852	0.039627	0					0					0					0					2091	0.99	-0.37869	0.458716	0.409059	5927	1	11.5066	138.774
DQA1_76_L	29687	0.45	0.071494	0.025474	0.005008	7143	0.65	0.003888	0.051112	0.939372	325050	0.53	0.012262	0.019138	0.521852	63001	0.5	0.00098	0.049694	0.984184	89860	0.49	0.0067	0.0148	0.6496	4265	0.52	0.102234	0.113539	0.367894	3236	0.51	0.004751	0.150339	0.974791	2062	0.56	-0.01643	0.143217	0.908668	2091	0.49	-0.13434	0.08939	0.132892	6065	0.17	-0.02033	0.069729
DQA1_56_CNV	29687	0.45	0.071494	0.025474	0.005008	7143	0.65	0.003888	0.051112	0.939372	325050	0.53	0.012262	0.019138	0.521852	63001	0.5	0.00098	0.049694	0.984184	89860	0.49	0.0067	0.0148	0.6496	4265	0.52	0.102234	0.113539	0.367894	3236	0.51	0.004751	0.150339	0.974791	2062	0.56	-0.01643	0.143217	0.908668	2091	0.49	-0.13434	0.08939	0.132892	6065	0.17	-0.02033	0.069729
DRB1_70_D	29687	0.68	-0.00011	0.025629	0.996624	7143	0.66	0.032217	0.052561	0.539913	325050	0.59	0.043601	0.019462	0.025082	63001	0.68	0.054763	0.053941	0.30991	82424	0.7	0.0038	0.0169	0.8226	4265	0.74	-0.01318	0.129816	0.91916	3236	0.75	0.167167	0.172589	0.332753	2063	0.77	-0.28992	0.168505	0.085332	2091	0.79	-0.08395	0.109	0.441171	5927	0.54	-0.01743	0.058356
DRB1_77_N	29687	0.22	-0.01864	0.035347	0.59798	7143	0.23	-0.03675	0.05868	0.531107	325050	0.28	-0.00981	0.021378	0.646338	63001	0.24	-0.06915	0.05846	0.236833	82424	0.24	-0.0207	0.0181	0.2534	4265	0.15	-0.05471	0.156151	0.726057	3236	0.18	-0.22949	0.193785	0.23632	2056	0.29	0.23691	0.159825	0.138259	2091	0.25	0.006306	0.103265	0.951304	0
DRB1_74_R	29687	0.22	-0.01864	0.035347	0.59798	7143	0.23	-0.03675	0.05868	0.531107	325050	0.28	-0.00981	0.021378	0.646338	63001	0.24	-0.06915	0.05846	0.236833	82424	0.24	-0.0207	0.0181	0.2534	4265	0.15	-0.05471	0.156151	0.726057	3236	0.18	-0.22949	0.193785	0.23632	2056	0.29	0.23691	0.159825	0.138259	2091	0.25	0.006306	0.103265	0.951304	0
DQA1_47_K	26077	0.25	-0.00732	0.028976	0.80052	7143	0.24	0.065067	0.056679	0.250972	325050	0.27	0.017919	0.021441	0.403284	63001	0.25	0.132006	0.055996	0.018399	89860	0.25	0.0217	0.0171	0.2054	4265	0.23	-0.0664	0.133586	0.619158	3236	0.25	-0.01459	0.173333	0.932933	2062	0.21	-0.09176	0.17433	0.598631	2091	0.19	-0.28218	0.113118	0.012612	0
DQA1_52_H	26077	0.25	-0.00732	0.028976	0.80052	7143	0.24	0.065067	0.056679	0.250972	325050	0.27	0.017919	0.021441	0.403284	63001	0.25	0.132006	0.055996	0.018399	89860	0.25	0.0217	0.0171	0.2054	4265	0.23	-0.0664	0.133586	0.619158	3236	0.25	-0.01459	0.173333	0.932933	2062	0.21	-0.09176	0.17433	0.598631	2091	0.19	-0.28218	0.113118	0.012612	0
DQA1_54_L	26077	0.25	-0.00732	0.028976	0.80052	7143	0.24	0.065067	0.056679	0.250972	325050	0.27	0.017919	0.021441	0.403284	63001	0.25	0.132006	0.055996	0.018399	89860	0.25	0.0217	0.0171	0.2054	4265	0.23	-0.0664	0.133586	0.619158	3236	0.25	-0.01459	0.173333	0.932933	2062	0.21	-0.09176	0.17433	0.598631	2091	0.19	-0.28218	0.113118	0.012612	0
DQA1_75_S	29687	0.22	-0.01889	0.035193	0.591424	7143	0.44	-0.03298	0.049064	0.501504	325050	0.27	-0.00847	0.021412	0.692459	63001	0.23	-0.08831	0.059299	0.136421	89860	0.23	-0.0212	0.0176	0.2282	4265	0.19	-0.02559	0.149452	0.864025	3236	0.16	-0.07999	0.206381	0.698336	2055	0.14	0.33864	0.201692	0.093152	2091	0.14	-0.01073	0.128176	0.933264	6065	0.08	0.071636	0.095541
DQB1_38_A	29687	0.84	-0.04562	0.032633	0.162087	7143	0.84	-0.13302	0.066181	0.044438	325050	0.83	-0.01659	0.025522	0.515592	63001	0.81	-0.00014	0.064449	0.998298	90188	0.83	-0.0167	0.0194	0.3896	4265	0.88	0.195466	0.17041	0.251366	3236	0.85	0.099895	0.207256	0.629812	2063	0.73	0.161543	0.158903	0.309336	2091	0.73	0.13392	0.100089	0.180894	6070	0.91	0.021529	0.097527
DQA1_54_Ref	26077	0.86	-0.03606	0.036694	0.325775	7143	0.98	-0.15522	0.185463	0.40262	325050	0.88	0.006808	0.028919	0.813873	63001	0.86	-0.07855	0.070873	0.267744	89860	0.86	-0.034	0.0213	0.1102	4265	0.88	0.129452	0.168603	0.44261	3236	0.88	0.106735	0.232599	0.646322	2062	0.87	0.03988	0.207163	0.847348	2091	0.85	0.118055	0.125856	0.348236	6065	0.93	-0.1024	0.102191
DQB1_71_T	29687	0.83	-0.02423	0.031497	0.441811	7143	0.83	-0.1083	0.064112	0.09117	325050	0.82	-0.01178	0.024766	0.634306	63001	0.81	0.005492	0.063842	0.931402	90188	0.81	-0.0276	0.0185	0.1367	4265	0.83	0.128534	0.146994	0.38189	3236	0.78	-0.1094	0.181345	0.546316	2063	0.62	0.036306	0.147388	0.805428	2091	0.64	0.078206	0.093412	0.402472	6070	0.91	-0.01557	0.092319
DQB1_74_E	29687	0.83	-0.02423	0.031497	0.441811	7143	0.83	-0.1083	0.064112	0.09117	325050	0.82	-0.01178	0.024766	0.634306	63001	0.81	0.005492	0.063842	0.931402	90188	0.81	-0.0276	0.0185	0.1367	4265	0.83	0.128534	0.146994	0.38189	3236	0.78	-0.1094	0.181345	0.546316	2063	0.62	0.036306	0.147388	0.805428	2091	0.64	0.078206	0.093412	0.402472	6070	0.91	-0.01557	0.092319
DQB1_75_L	29687	0.83	-0.02423	0.031497	0.441811	7143	0.83	-0.1083	0.064112	0.09117	325050	0.82	-0.01178	0.024766	0.634306	63001	0.81	0.005492	0.063842	0.931402	90188	0.81	-0.0276	0.0185	0.1367	4265	0.83	0.128534	0.146994	0.38189	3236	0.78	-0.1094	0.181345	0.546316	2063	0.62	0.036306	0.147388	0.805428	2091	0.64	0.078206	0.093412	0.402472	6070	0.91	-0.01557	0.092319
DRB1_30_G	29687	0.02	0.097888	0.082655	0.236297	7143	0.02	-0.09649	0.165775	0.560513	325050	0.03	0.004156	0.060166	0.944847	63001	0.03	0.073281	0.165558	0.658046	82424	0.02	0.0513	0.0536	0.3387	4265	0.02	0.414366	0.392198	0.290729	3236	0.02	-0.49351	0.569768	0.386404	2058	0.05	-0.30356	0.311195	0.329323	2091	0.06	0.570148	0.192785	0.003102	5927	0.28	-0.02965	0.061138
DRB1_28_H	29687	0.02	0.097888	0.082655	0.236297	7143	0.02	-0.09649	0.165775	0.560513	325050	0.03	0.004156	0.060166	0.944847	63001	0.03	0.073281	0.165558	0.658046	82424	0.02	0.0513	0.0536	0.3387	4265	0.02	0.414366	0.392198	0.290729	3236	0.02	-0.49351	0.569768	0.386404	2058	0.05	-0.30356	0.311195	0.329323	2091	0.06	0.570148	0.192785	0.003102	5927	0.28	-0.02965	0.061138
DRB1_9_K	29687	0.02	0.097888	0.082655	0.236297	7143	0.02	-0.09649	0.165775	0.560513	325050	0.03	0.004156	0.060166	0.944847	63001	0.03	0.073281	0.165558	0.658046	82424	0.02	0.0513	0.0536	0.3387	4265	0.02	0.414366	0.392198	0.290729	3236	0.02	-0.49351	0.569768	0.386404	2058	0.05	-0.30356	0.311195	0.329323	2091	0.06	0.570148	0.192785	0.003102	5927	0.28	-0.02965	0.061138
DRB1_11_D	29687	0.02	0.097888	0.082655	0.236297	7143	0.02	-0.09649	0.165775	0.560513	325050	0.03	0.004156	0.060166	0.944847	63001	0.03	0.073281	0.165558	0.658046	82424	0.02	0.0513	0.0536	0.3387	4265	0.02	0.414366	0.392198	0.290729	3236	0.02	-0.49351	0.569768	0.386404	2058	0.05	-0.30356	0.311195	0.329323	2091	0.06	0.570148	0.192785	0.003102	5927	0.28	-0.02965	0.061138
DQB1_77_T	29687	0.85	-0.03649	0.033293	0.273079	7143	0.85	-0.11244	0.067514	0.095839	325050	0.84	-0.01535	0.025736	0.550833	63001	0.84	-0.01217	0.067132	0.856121	90188	0.83	-0.0214	0.0197	0.2774	4265	0.89	0.176651	0.177813	0.320484	3236	0.86	0.054329	0.212859	0.798541	2063	0.73	0.158838	0.159	0.317805	2091	0.73	0.13392	0.100089	0.180894	6070	0.99	-0.09401	0.215084
DQB1_37_Ref	29687	0.95	-0.02087	0.055068	0.704646	7143	0.95	-0.04325	0.109909	0.693922	325050	0.93	0.053518	0.038509	0.164592	63001	0.93	0.019425	0.099119	0.844667	90188	0.94	0.0211	0.0321	0.5101	4265	0.97	0.313915	0.311836	0.314096	3236	0.96	0.39778	0.371218	0.28392	2055	0.89	0.40911	0.2317	0.077449	2091	0.91	0.192753	0.15265	0.206693	6070	0.97	0.015131	0.155031
DQB1_26_Y	29687	0.37	0.039346	0.024713	0.11136	7143	0.37	-0.00251	0.050852	0.960602	325050	0.33	-0.00565	0.020275	0.780329	63001	0.39	0.01788	0.051552	0.728679	90188	0.36	0.0187	0.0156	0.2289	4265	0.43	0.045383	0.114323	0.691385	3236	0.34	-0.06166	0.157731	0.695852	2054	0.13	0.215529	0.209552	0.303703	2091	0.16	-0.05023	0.123392	0.683927	6070	0.51	-0.00053	0.057072
DQB1_13_A	29687	0.37	0.039346	0.024713	0.11136	7143	0.37	-0.00251	0.050852	0.960602	325050	0.33	-0.00565	0.020275	0.780329	63001	0.39	0.01788	0.051552	0.728679	90188	0.36	0.0187	0.0156	0.2289	4265	0.43	0.045383	0.114323	0.691385	3236	0.34	-0.06166	0.157731	0.695852	2054	0.13	0.215529	0.209552	0.303703	2091	0.16	-0.05023	0.123392	0.683927	6070	0.51	-0.00053	0.057072
DRB1_47_Ref	29687	0.76	-0.01702	0.027644	0.538092	7143	0.76	-0.04131	0.056984	0.468508	325050	0.79	-0.03965	0.023151	0.086777	63001	0.75	0.019406	0.057497	0.735841	82424	0.76	0.0002	0.0179	0.9915	4265	0.83	0.013879	0.150455	0.926501	3236	0.79	-0.18452	0.182649	0.312387	2063	0.7	-0.02555	0.154667	0.868789	2091	0.68	-0.29882	0.095648	0.001783	5927	0.85	0.183129	0.08263
DQB1_28_Ref	29687	0.95	-0.01573	0.057206	0.783336	7143	0.95	0.000607	0.114709	0.995775	325050	0.94	0.055756	0.03911	0.153962	63001	0.95	0.032081	0.108486	0.767407	90188	0.95	0.0071	0.033	0.8285	4265	0.97	0.263108	0.336256	0.433942	3236	0.96	0.338646	0.394528	0.390694	2055	0.89	0.404768	0.232201	0.081303	2091	0.91	0.192753	0.15265	0.206693	6070	1	11.5703	196.968
DQB1_46_Ref	29687	0.95	-0.01573	0.057206	0.783336	7143	0.95	0.000607	0.114709	0.995775	325050	0.94	0.055756	0.03911	0.153962	63001	0.95	0.032081	0.108486	0.767407	90188	0.95	0.0071	0.033	0.8285	4265	0.97	0.263108	0.336256	0.433942	3236	0.96	0.338646	0.394528	0.390694	2055	0.89	0.404768	0.232201	0.081303	2091	0.91	0.192753	0.15265	0.206693	6070	1	11.5703	196.968
DQB1_47_Ref	29687	0.95	-0.01573	0.057206	0.783336	7143	0.95	0.000607	0.114709	0.995775	325050	0.94	0.055756	0.03911	0.153962	63001	0.95	0.032081	0.108486	0.767407	90188	0.95	0.0071	0.033	0.8285	4265	0.97	0.263108	0.336256	0.433942	3236	0.96	0.338646	0.394528	0.390694	2055	0.89	0.404768	0.232201	0.081303	2091	0.91	0.192753	0.15265	0.206693	6070	1	11.5703	196.968
DQB1_52_Ref	29687	0.95	-0.01573	0.057206	0.783336	7143	0.95	0.000607	0.114709	0.995775	325050	0.94	0.055756	0.03911	0.153962	63001	0.95	0.032081	0.108486	0.767407	90188	0.95	0.0071	0.033	0.8285	4265	0.97	0.263108	0.336256	0.433942	3236	0.96	0.338646	0.394528	0.390694	2055	0.89	0.404768	0.232201	0.081303	2091	0.91	0.192753	0.15265	0.206693	6070	1	11.5703	196.968
DQB1_30_S	29687	0.22	-0.01671	0.035416	0.637096	7143	0.39	0.058558	0.050224	0.243647	325050	0.27	-0.00895	0.021441	0.676438	63001	0.22	-0.08347	0.059697	0.162053	90188	0.22	-0.0212	0.0177	0.2313	4265	0.11	-0.27626	0.177901	0.120453	3236	0.14	-0.15631	0.21919	0.475769	2055	0.14	0.275081	0.204466	0.178509	2091	0.13	-0.00708	0.131537	0.957044	0
DQB1_74_A	29687	0.22	-0.01671	0.035416	0.637096	7143	0.39	0.058558	0.050224	0.243647	325050	0.27	-0.00895	0.021441	0.676438	63001	0.22	-0.08347	0.059697	0.162053	90188	0.22	-0.0212	0.0177	0.2313	4265	0.11	-0.27626	0.177901	0.120453	3236	0.14	-0.15631	0.21919	0.475769	2055	0.14	0.275081	0.204466	0.178509	2091	0.13	-0.00708	0.131537	0.957044	0
DQB1_52_L	29687	0.22	-0.01671	0.035416	0.637096	7143	0.39	0.058558	0.050224	0.243647	325050	0.27	-0.00895	0.021441	0.676438	63001	0.22	-0.08347	0.059697	0.162053	90188	0.22	-0.0212	0.0177	0.2313	4265	0.11	-0.27626	0.177901	0.120453	3236	0.14	-0.15631	0.21919	0.475769	2055	0.14	0.275081	0.204466	0.178509	2091	0.13	-0.00708	0.131537	0.957044	0
DQB1_37_I	29687	0.22	-0.01671	0.035416	0.637096	7143	0.39	0.058558	0.050224	0.243647	325050	0.27	-0.00895	0.021441	0.676438	63001	0.22	-0.08347	0.059697	0.162053	90188	0.22	-0.0212	0.0177	0.2313	4265	0.11	-0.27626	0.177901	0.120453	3236	0.14	-0.15631	0.21919	0.475769	2055	0.14	0.275081	0.204466	0.178509	2091	0.13	-0.00708	0.131537	0.957044	0
DQB1_46_E	29687	0.22	-0.01671	0.035416	0.637096	7143	0.39	0.058558	0.050224	0.243647	325050	0.27	-0.00895	0.021441	0.676438	63001	0.22	-0.08347	0.059697	0.162053	90188	0.22	-0.0212	0.0177	0.2313	4265	0.11	-0.27626	0.177901	0.120453	3236	0.14	-0.15631	0.21919	0.475769	2055	0.14	0.275081	0.204466	0.178509	2091	0.13	-0.00708	0.131537	0.957044	0
DQB1_47_F	29687	0.22	-0.01671	0.035416	0.637096	7143	0.39	0.058558	0.050224	0.243647	325050	0.27	-0.00895	0.021441	0.676438	63001	0.22	-0.08347	0.059697	0.162053	90188	0.22	-0.0212	0.0177	0.2313	4265	0.11	-0.27626	0.177901	0.120453	3236	0.14	-0.15631	0.21919	0.475769	2055	0.14	0.275081	0.204466	0.178509	2091	0.13	-0.00708	0.131537	0.957044	0
DQB1_71_K	29687	0.22	-0.01671	0.035416	0.637096	7143	0.39	0.058558	0.050224	0.243647	325050	0.27	-0.00895	0.021441	0.676438	63001	0.22	-0.08347	0.059697	0.162053	90188	0.22	-0.0212	0.0177	0.2313	4265	0.11	-0.27626	0.177901	0.120453	3236	0.14	-0.15631	0.21919	0.475769	2055	0.14	0.275081	0.204466	0.178509	2091	0.13	-0.00708	0.131537	0.957044	0
DQB1_28_S	29687	0.22	-0.01671	0.035416	0.637096	7143	0.39	0.058558	0.050224	0.243647	325050	0.27	-0.00895	0.021441	0.676438	63001	0.22	-0.08347	0.059697	0.162053	90188	0.22	-0.0212	0.0177	0.2313	4265	0.11	-0.27626	0.177901	0.120453	3236	0.14	-0.15631	0.21919	0.475769	2055	0.14	0.275081	0.204466	0.178509	2091	0.13	-0.00708	0.131537	0.957044	0
DQB1_55_L	29687	0.22	-0.01671	0.035416	0.637096	7143	0.39	0.058558	0.050224	0.243647	325050	0.27	-0.00895	0.021441	0.676438	63001	0.22	-0.08347	0.059697	0.162053	90188	0.22	-0.0212	0.0177	0.2313	4265	0.11	-0.27626	0.177901	0.120453	3236	0.14	-0.15631	0.21919	0.475769	2055	0.14	0.275081	0.204466	0.178509	2091	0.13	-0.00708	0.131537	0.957044	0
DQB1_93_Ref	0					0					325050	0.98	0.01895	0.073401	0.796375	63001	0.97	-0.08889	0.146919	0.545164	90188	0.98	-0.0818	0.0503	0.1035	0					0					0					0					6070	0.95	0.017177	0.129423
DQB1_10_Ref	0					0					325050	0.98	0.01895	0.073401	0.796375	63001	0.97	-0.08889	0.146919	0.545164	90188	0.98	-0.0818	0.0503	0.1035	0					0					0					0					6070	0.95	0.017177	0.129423
DQB1_91_Ref	0					0					325050	0.98	0.01895	0.073401	0.796375	63001	0.97	-0.08889	0.146919	0.545164	90188	0.98	-0.0818	0.0503	0.1035	0					0					0					0					6070	0.95	0.017177	0.129423
DQB1_12_Ref	0					0					325050	0.98	0.01895	0.073401	0.796375	63001	0.97	-0.08889	0.146919	0.545164	90188	0.98	-0.0818	0.0503	0.1035	0					0					0					0					6070	0.95	0.017177	0.129423
DQB1_81_Ref	0					0					325050	0.98	0.01895	0.073401	0.796375	63001	0.97	-0.08889	0.146919	0.545164	90188	0.98	-0.0818	0.0503	0.1035	0					0					0					0					6070	0.95	0.017177	0.129423
DQB1_88_Ref	0					0					325050	0.98	0.01895	0.073401	0.796375	63001	0.97	-0.08889	0.146919	0.545164	90188	0.98	-0.0818	0.0503	0.1035	0					0					0					0					6070	0.95	0.017177	0.129423
DQB1_82_Ref	0					0					325050	0.98	0.01895	0.073401	0.796375	63001	0.97	-0.08889	0.146919	0.545164	90188	0.98	-0.0818	0.0503	0.1035	0					0					0					0					6070	0.95	0.017177	0.129423
DQB1_11_Ref	0					0					325050	0.98	0.01895	0.073401	0.796375	63001	0.97	-0.08889	0.146919	0.545164	90188	0.98	-0.0818	0.0503	0.1035	0					0					0					0					6070	0.95	0.017177	0.129423
DQB1_83_Ref	0					0					325050	0.98	0.01895	0.073401	0.796375	63001	0.97	-0.08889	0.146919	0.545164	90188	0.98	-0.0818	0.0503	0.1035	0					0					0					0					6070	0.95	0.017177	0.129423
DQB1_92_Ref	0					0					325050	0.98	0.01895	0.073401	0.796375	63001	0.97	-0.08889	0.146919	0.545164	90188	0.98	-0.0818	0.0503	0.1035	0					0					0					0					6070	0.95	0.017177	0.129423
DQA1_51_L	29687	0.27	-0.02843	0.030855	0.356844	7143	0.48	-0.02053	0.048715	0.673378	325050	0.31	-0.00661	0.020621	0.7484	63001	0.29	-0.10426	0.054863	0.057394	89860	0.29	-0.0113	0.0163	0.4897	4265	0.34	0.151669	0.124158	0.221868	3236	0.3	-0.13437	0.166444	0.4195	2062	0.4	0.088566	0.148439	0.550742	2091	0.33	0.087857	0.095017	0.355152	6065	0.16	-0.01351	0.070041
DQA1_50_V	29687	0.27	-0.02843	0.030855	0.356844	7143	0.48	-0.02053	0.048715	0.673378	325050	0.31	-0.00661	0.020621	0.7484	63001	0.29	-0.10426	0.054863	0.057394	89860	0.29	-0.0113	0.0163	0.4897	4265	0.34	0.151669	0.124158	0.221868	3236	0.3	-0.13437	0.166444	0.4195	2062	0.4	0.088566	0.148439	0.550742	2091	0.33	0.087857	0.095017	0.355152	6065	0.16	-0.01351	0.070041
DQA1_40_G	29687	0.27	-0.02843	0.030855	0.356844	7143	0.48	-0.02053	0.048715	0.673378	325050	0.31	-0.00661	0.020621	0.7484	63001	0.29	-0.10426	0.054863	0.057394	89860	0.29	-0.0113	0.0163	0.4897	4265	0.34	0.151669	0.124158	0.221868	3236	0.3	-0.13437	0.166444	0.4195	2062	0.4	0.088566	0.148439	0.550742	2091	0.33	0.087857	0.095017	0.355152	6065	0.16	-0.01351	0.070041
DQA1_47_C	29687	0.27	-0.02843	0.030855	0.356844	7143	0.48	-0.02053	0.048715	0.673378	325050	0.31	-0.00661	0.020621	0.7484	63001	0.29	-0.10426	0.054863	0.057394	89860	0.29	-0.0113	0.0163	0.4897	4265	0.34	0.151669	0.124158	0.221868	3236	0.3	-0.13437	0.166444	0.4195	2062	0.4	0.088566	0.148439	0.550742	2091	0.33	0.087857	0.095017	0.355152	6065	0.16	-0.01351	0.070041
DQA1_53_Q	29687	0.27	-0.02843	0.030855	0.356844	7143	0.48	-0.02053	0.048715	0.673378	325050	0.31	-0.00661	0.020621	0.7484	63001	0.29	-0.10426	0.054863	0.057394	89860	0.29	-0.0113	0.0163	0.4897	4265	0.34	0.151669	0.124158	0.221868	3236	0.3	-0.13437	0.166444	0.4195	2062	0.4	0.088566	0.148439	0.550742	2091	0.33	0.087857	0.095017	0.355152	6065	0.16	-0.01351	0.070041
DRB1_94_Ref	0					0					325050	0.87	-0.05959	0.028058	0.033697	63001	0.85	-0.03297	0.069227	0.633855	82424	0.86	-0.0008	0.0224	0.9698	0					0					0					2091	0.9	-0.16363	0.146813	0.265056	5927	0.86	0.183211	0.086101
DRB1_30_H	29687	0.03	0.019136	0.064906	0.768132	7143	0.04	0.139822	0.124932	0.263061	325050	0.03	-0.06738	0.057502	0.241256	63001	0.07	-0.02304	0.111734	0.836601	82424	0.03	-0.0328	0.0444	0.461	4265	0.05	-0.40551	0.239634	0.090608	3236	0.09	-0.36957	0.266116	0.164907	2062	0.35	0.1223	0.150821	0.417423	2091	0.32	0.084568	0.096333	0.380015	5927	0.1	-0.14624	0.087973
DRB1_85_A	29687	0.07	0.036447	0.047224	0.44024	7143	0.08	0.004942	0.093823	0.957993	325050	0.04	-0.03048	0.047183	0.518332	63001	0.09	-0.0507	0.093631	0.588212	82424	0.07	-0.0446	0.0318	0.1606	4265	0.1	-0.07051	0.189597	0.709983	3236	0.14	0.138025	0.215075	0.521034	2053	0.13	0.257784	0.206024	0.210848	2091	0.16	0.096877	0.122201	0.427913	5927	0.1	-0.14696	0.088256
DRB1_26_Y	29687	0.24	-0.00054	0.033517	0.987117	7143	0.25	-0.04436	0.057142	0.437522	325050	0.3	-0.01154	0.02089	0.580566	63001	0.25	-0.0589	0.057625	0.306737	82424	0.26	-0.0155	0.0177	0.3809	4265	0.14	-0.13507	0.161924	0.404192	3236	0.16	-0.23452	0.205665	0.254158	2062	0.18	0.121337	0.180983	0.502582	2091	0.18	0.142184	0.115533	0.218446	5927	0.28	-0.02372	0.061069
DRB1_38_Ref	29687	1	-0.33029	0.372365	0.375079	7143	1	2.35165	1.44447	0.103518	325050	1	-0.09927	0.457462	0.828213	63001	1	-0.07128	0.502852	0.887278	37913	1	0.8058	0.3881	0.03789	4265	1	-2.51358	2.5293	0.320328	3236	1	0.683999	1.33214	0.607632	2055	0.99	-0.33307	0.8719	0.702454	2091	0.99	-0.86969	0.510721	0.088593	5927	0.99	0.395794	0.333399
DRB1_77_Ref	29687	0.98	0.025636	0.095695	0.788782	7143	0.99	-0.03515	0.208748	0.866262	325050	0.98	0.06596	0.065292	0.312371	63001	0.98	0.093576	0.178506	0.600112	81908	0.98	0.0602	0.0615	0.3281	4265	0.99	0.59505	0.712283	0.403486	3236	0.99	-0.74876	0.62309	0.229484	2056	0.97	-0.75101	0.392305	0.055574	2091	0.98	-0.2587	0.289654	0.371784	5927	1	11.5066	138.774
DQB1_66_Ref	29687	0.94	0.006011	0.049221	0.902808	7143	0.94	0.011415	0.09948	0.908643	325050	0.92	0.053148	0.035785	0.137436	63001	0.92	-0.00768	0.090212	0.932131	90188	0.93	0.0089	0.0285	0.7556	4265	0.92	0.28956	0.216232	0.180532	3236	0.91	0.116076	0.263649	0.659743	2056	0.82	0.120385	0.188915	0.523964	2091	0.86	0.080003	0.127875	0.531556	6070	0.88	-0.1257	0.083445
DQB1_67_Ref	29687	0.94	0.006011	0.049221	0.902808	7143	0.94	0.011415	0.09948	0.908643	325050	0.92	0.053148	0.035785	0.137436	63001	0.92	-0.00768	0.090212	0.932131	90188	0.93	0.0089	0.0285	0.7556	4265	0.92	0.28956	0.216232	0.180532	3236	0.91	0.116076	0.263649	0.659743	2056	0.82	0.120385	0.188915	0.523964	2091	0.86	0.080003	0.127875	0.531556	6070	0.88	-0.1257	0.083445
DRB1_37_L	29687	0.03	0.028228	0.065036	0.664259	7143	0.04	0.152603	0.12667	0.228308	325050	0.03	-0.06812	0.057538	0.236475	63001	0.05	-0.06975	0.126283	0.580727	82424	0.03	-0.0309	0.0447	0.4889	4265	0.03	-0.39224	0.3077	0.202403	3236	0.06	-0.36761	0.31436	0.242245	2052	0.06	0.306771	0.277774	0.269425	2091	0.08	0.310008	0.162727	0.05677	5927	0.1	-0.14696	0.088256
DRB1_38_L	29687	0.03	0.028228	0.065036	0.664259	7143	0.04	0.152603	0.12667	0.228308	325050	0.03	-0.06812	0.057538	0.236475	63001	0.05	-0.06975	0.126283	0.580727	82424	0.03	-0.0309	0.0447	0.4889	4265	0.03	-0.39224	0.3077	0.202403	3236	0.06	-0.36761	0.31436	0.242245	2052	0.06	0.306771	0.277774	0.269425	2091	0.08	0.310008	0.162727	0.05677	5927	0.1	-0.14696	0.088256
DQA1_25_F	29687	0.35	0.041356	0.024465	0.090946	7143	0.36	0.056318	0.050703	0.266678	325050	0.37	0.02601	0.019792	0.188697	63001	0.4	0.070947	0.051027	0.164387	89860	0.38	-0.0102	0.0152	0.5044	4265	0.33	-0.04084	0.119666	0.732908	3236	0.4	0.114621	0.152876	0.453397	2062	0.28	-0.18821	0.157214	0.231253	2091	0.27	-0.16212	0.100518	0.106783	6065	0.37	-0.06592	0.066949
DRB1_60_H	29687	0.05	0.046997	0.054694	0.390181	7143	0.05	-0.15579	0.107821	0.148488	325050	0.04	0.056572	0.046573	0.224473	63001	0.06	-0.02236	0.1085	0.836754	82424	0.06	0.0215	0.0325	0.5073	4265	0.04	-0.51034	0.296767	0.085495	3236	0.03	0.285875	0.431493	0.507634	0					0					5927	0.01
DQB1_45_E	29687	0.35	0.030342	0.024805	0.221236	7143	0.36	-0.02222	0.051101	0.663668	325050	0.33	-0.00861	0.020389	0.6729	63001	0.34	-0.00341	0.052477	0.948111	90188	0.35	0.019	0.0156	0.2244	4265	0.4	0.044769	0.116038	0.699637	3236	0.31	-0.04031	0.160436	0.801619	2054	0.13	0.2211	0.20984	0.292038	2091	0.15	-0.0379	0.123704	0.759345	6070	0.22	-0.02022	0.063483
DQB1_23_Ref	0					0					101417	1	0.192292	0.4758	0.686097	27611	1	2.03323	1.14284	0.075225	40747	0.99	-0.0139	0.1047	0.8941	0					0					0					0					6070	0.98	0.082943	0.209052
DRB1_57_A	29687	0.05	0.046997	0.054694	0.390181	7143	0.05	-0.15579	0.107821	0.148488	325050	0.04	0.056572	0.046573	0.224473	63001	0.06	-0.02236	0.1085	0.836754	82424	0.06	0.0215	0.0325	0.5073	4265	0.04	-0.54029	0.28685	0.059631	3236	0.03	0.107939	0.412322	0.793488	0					0					5927	0.01
DRB1_6_Ref	0					0					325050	1	-0.57028	0.578726	0.324428	63001	1	1.34951	0.598706	0.024194	49702	1	-0.037	0.3295	0.9107	0					0					0					2091	0.98	0.000891	0.329928	0.997844	5927	0.97	-0.01302	0.145387
DQA1_88_Ref	0					0					325050	0.87	0.025378	0.028785	0.378062	63001	0.86	0.022216	0.072343	0.75871	89860	0.87	0.0084	0.022	0.7041	0					0					0					0					6065	0.92	-0.12671	0.097673
DQA1_34_Ref	29687	0.56	-0.00036	0.023651	0.987913	7143	0.7	-0.05461	0.053198	0.304601	325050	0.61	-0.01747	0.019546	0.371472	63001	0.54	0.081516	0.050182	0.104251	89860	0.58		0.0149	0.9984	4265	0.58	0.029245	0.114974	0.799219	3236	0.6	-0.06952	0.152719	0.648935	2063	0.3	-0.0283	0.154274	0.85444	2091	0.33	-0.25141	0.095284	0.008326	6065	0.5	0.01596	0.053913
DQB1_56_L	29687	0.05	-0.06397	0.052185	0.220268	7143	0.05	0.0124	0.109581	0.909903	325050	0.04	-0.03537	0.04903	0.470635	63001	0.06	-0.09867	0.11188	0.377795	90188	0.07	0.029	0.03	0.3351	4265	0.18	0.301955	0.153029	0.048474	3236	0.17	-0.17347	0.206209	0.400211	2053	0.19	0.096328	0.194218	0.61991	2091	0.15	0.072017	0.126519	0.569207	6070	0.31	0.171359	0.058319
DQB1_23_L	0					0					0					0					0					0					0					0					0					6070	0.24	0.133553	0.062623
DRB1_40_Y	29687	0.02	0.084292	0.087142	0.333395	7143	0.02	0.218955	0.186983	0.241602	325050	0.01	-0.02318	0.090211	0.797235	63001	0.04	-0.29376	0.15661	0.060692	81908	0.02	0.0555	0.0523	0.2884	4265	0.04	-0.25288	0.284936	0.374816	3236	0.05	0.26206	0.339241	0.439824	1997	0.04	-0.08171	0.374204	0.827147	2091	0.04	0.0399	0.22505	0.859277	5927	0.01
DRB1_31_V	29687	0.02	0.084292	0.087142	0.333395	7143	0.02	0.218955	0.186983	0.241602	325050	0.01	-0.02318	0.090211	0.797235	63001	0.04	-0.29376	0.15661	0.060692	81908	0.02	0.0555	0.0523	0.2884	4265	0.04	-0.25288	0.284936	0.374816	3236	0.05	0.26206	0.339241	0.439824	1997	0.04	-0.08171	0.374204	0.827147	2091	0.04	0.0399	0.22505	0.859277	5927	0.01
DRB1_30_R	29687	0.02	0.084292	0.087142	0.333395	7143	0.02	0.218955	0.186983	0.241602	325050	0.01	-0.02318	0.090211	0.797235	63001	0.04	-0.29376	0.15661	0.060692	81908	0.02	0.0555	0.0523	0.2884	4265	0.04	-0.25288	0.284936	0.374816	3236	0.05	0.26206	0.339241	0.439824	1997	0.04	-0.08171	0.374204	0.827147	2091	0.04	0.0399	0.22505	0.859277	5927	0.01
DRB1_38_A	29687	0.02	0.084292	0.087142	0.333395	7143	0.02	0.218955	0.186983	0.241602	325050	0.01	-0.02318	0.090211	0.797235	63001	0.04	-0.29376	0.15661	0.060692	81908	0.02	0.0555	0.0523	0.2884	4265	0.04	-0.25288	0.284936	0.374816	3236	0.05	0.26206	0.339241	0.439824	1997	0.04	-0.08171	0.374204	0.827147	2091	0.04	0.0399	0.22505	0.859277	5927	0.01
DRB1_10_E	29687	0.02	0.084292	0.087142	0.333395	7143	0.02	0.218955	0.186983	0.241602	325050	0.01	-0.02318	0.090211	0.797235	63001	0.04	-0.29376	0.15661	0.060692	81908	0.02	0.0555	0.0523	0.2884	4265	0.04	-0.25288	0.284936	0.374816	3236	0.05	0.26206	0.339241	0.439824	1997	0.04	-0.08171	0.374204	0.827147	2091	0.04	0.0399	0.22505	0.859277	5927	0.01
DRB1_67_I	29687	0.68	0.010494	0.025388	0.679363	7143	0.67	0.013333	0.051807	0.796901	325050	0.67	0.024786	0.020377	0.223679	63001	0.69	0.134308	0.054116	0.013076	82424	0.68	-0.0146	0.0166	0.3799	4265	0.62	-0.03088	0.120549	0.797817	3236	0.73	0.06756	0.169234	0.689741	2063	0.75	-0.07516	0.164038	0.64684	2091	0.75	0.100306	0.103935	0.334505	5927	0.62	-0.11936	0.065322
DRB1_85_Ref	29687	1	0.016256	0.23779	0.945498	7143	1	0.058147	0.529318	0.912526	325050	1	0.499322	0.479906	0.298124	63001	1	0.510571	0.53068	0.335993	49702	1	0.177	0.2444	0.4688	4265	1	-0.33347	2.23043	0.881152	3236	1	0.846777	1.07303	0.430029	2053	0.99	-0.55649	0.665544	0.403074	2091	0.99	-1.05913	0.403715	0.008704	5927	0.99	0.496902	0.351311
DRB1_74_L	29687	0.06	-0.04481	0.050989	0.379468	7143	0.06	0.034831	0.105036	0.740186	325050	0.04	0.006729	0.046365	0.884528	63001	0.06	-0.13564	0.111584	0.22415	82424	0.07	0.0403	0.031	0.1941	4265	0.16	0.071495	0.166453	0.667542	3236	0.11	-0.22668	0.252178	0.368702	2058	0.16	-0.21775	0.207319	0.29358	2091	0.13	-0.10096	0.132947	0.447626	5927	0.25	0.041154	0.060157
DRB1_40_Ref	29687	1	-0.5197	0.604295	0.389787	7143	1	2.4108	2.04907	0.239382	325050	1	-0.48643	1.58629	0.759113	63001	1	-1.02356	0.881628	0.245648	0					4265	1	-2.51358	2.5293	0.320328	0					1997	1	1.14311	1.34078	0.393895	2091	1	-0.82703	0.718987	0.250032	5927	1	0.628442	1.22607
DQB1_56_Ref	29687	0.98	-0.04941	0.090142	0.583602	7143	1	-0.34325	0.840199	0.682883	325050	0.98	0.050458	0.077019	0.512349	63001	0.98	-0.11934	0.179842	0.506952	90188	0.98	-0.0879	0.0533	0.09895	4265	0.96	0.249673	0.293358	0.394721	3236	0.95	-0.16992	0.373955	0.649547	2053	0.87	0.355469	0.222461	0.110067	2091	0.9	0.039228	0.150657	0.794573	6070	0.97	-0.05167	0.156828
DQB1_70_E	29687	0.05	-0.06627	0.051308	0.196522	7143	0.05	0.042974	0.10767	0.689797	325050	0.04	-0.05774	0.04769	0.225982	63001	0.06	-0.08128	0.109131	0.456407	90188	0.07	0.0312	0.0296	0.2928	4265	0.18	0.301955	0.153029	0.048474	3236	0.17	-0.17347	0.206209	0.400211	2053	0.19	0.096328	0.194218	0.61991	2091	0.15	0.072017	0.126519	0.569207	6070	0.31	0.171359	0.058319
DQB1_71_D	29687	0.05	-0.06627	0.051308	0.196522	7143	0.05	0.042974	0.10767	0.689797	325050	0.04	-0.05774	0.04769	0.225982	63001	0.06	-0.08128	0.109131	0.456407	90188	0.07	0.0312	0.0296	0.2928	4265	0.18	0.301955	0.153029	0.048474	3236	0.17	-0.17347	0.206209	0.400211	2053	0.19	0.096328	0.194218	0.61991	2091	0.15	0.072017	0.126519	0.569207	6070	0.31	0.171359	0.058319
DQB1_30_Y	29687	0.76	-0.02064	0.027973	0.460544	7143	0.77	-0.08665	0.057587	0.132421	325050	0.77	-0.0179	0.022548	0.427157	63001	0.77	0.038056	0.058997	0.518914	90188	0.74	0.0018	0.0168	0.9131	4265	0.84	0.18943	0.149696	0.205718	3236	0.77	-0.30129	0.177013	0.088745	2063	0.69	0.164599	0.151742	0.278043	2091	0.69	0.093782	0.096522	0.331244	6070	0.96	-0.01339	0.132438
DRB1_73_G	29687	0.44	0.000787	0.025902	0.975772	7143	0.44	0.035505	0.049407	0.472371	325050	0.5	0.010114	0.019102	0.596141	63001	0.45	0.056222	0.050062	0.261363	82424	0.46	0.0039	0.0155	0.8031	4265	0.37	-0.11176	0.11665	0.338019	3236	0.41	-0.0562	0.152868	0.713161	2062	0.44	0.122513	0.142681	0.390533	2091	0.41	-0.16377	0.09093	0.07169	0
DQA1_75_Ref	29687	0.87	0.013098	0.0356	0.712941	7143	0.93	-0.04675	0.097146	0.630377	325050	0.87	0.018811	0.028892	0.515131	63001	0.87	0.017206	0.073158	0.814001	89860	0.87	0.0068	0.0221	0.7569	4265	0.89	0.248056	0.179035	0.165894	3236	0.92	-0.09409	0.26212	0.719638	2055	0.9	-0.39452	0.229848	0.086078	2091	0.87	-0.12134	0.133588	0.363713	6065	0.91	-0.08372	0.090684
DRB1_58_Ref	29687	0.99	0.084078	0.102417	0.411681	7143	0.99	0.191724	0.214628	0.371704	325050	1	-0.10965	0.157034	0.485004	63001	0.99	-0.15417	0.21905	0.481564	74736	0.99	-0.0459	0.0845	0.5871	4265	0.99	0.028997	0.507947	0.954477	3236	0.99	-0.568	0.92892	0.540895	2061	0.97	0.320717	0.468375	0.493506	2091	0.97	-0.38541	0.27966	0.168163	5927	1	-0.64978	0.628291
DQA1_40_Ref	29687	0.85	0.018884	0.03331	0.570766	7143	0.92	-0.05096	0.088173	0.563307	325050	0.86	0.012203	0.027417	0.656442	63001	0.84	0.059719	0.068334	0.38214	89860	0.85	-0.0026	0.0205	0.898	4265	0.82	0.139095	0.147752	0.346497	3236	0.87	0.005912	0.219533	0.978516	2062	0.78	-0.20329	0.173007	0.239971	2091	0.78	-0.06842	0.107875	0.52594	6065	0.88	-0.01322	0.08126
DQA1_51_Ref	29687	0.85	0.018884	0.03331	0.570766	7143	0.92	-0.05096	0.088173	0.563307	325050	0.86	0.012203	0.027417	0.656442	63001	0.84	0.059719	0.068334	0.38214	89860	0.85	-0.0026	0.0205	0.898	4265	0.82	0.139095	0.147752	0.346497	3236	0.87	0.005912	0.219533	0.978516	2062	0.78	-0.20329	0.173007	0.239971	2091	0.78	-0.06842	0.107875	0.52594	6065	0.88	-0.01322	0.08126
DRB1_91_Ref	0					0					325050	0.97	0.025635	0.059648	0.667351	63001	0.95	-0.04902	0.122575	0.689215	82424	0.96	-0.0049	0.0404	0.9041	0					0					0					2091	0.97	0.178418	0.279255	0.522883	5927	0.97	0.293995	0.168606
DRB1_16_Ref	29687	1	0.408431	0.220366	0.063822	7143	1	-0.08663	0.530552	0.870293	325050	1	0.090597	0.25666	0.724097	63001	0.99	0.105982	0.406466	0.794307	80198	1	0.0076	0.1424	0.9572	4265	0.99	-0.20832	0.554702	0.707251	3236	1	1.49804	1.53042	0.32766	2058	0.98	0.19239	0.570882	0.736114	2091	0.99	-0.56653	0.419611	0.176973	5927	0.95	0.016763	0.119707
DRB1_57_S	29687	0.08	-0.02545	0.042287	0.547245	7143	0.08	0.075464	0.088748	0.395148	325050	0.07	0.004694	0.037619	0.900695	63001	0.08	-0.13294	0.093328	0.154331	82424	0.1	0.0134	0.0262	0.6093	4265	0.1	-0.03992	0.185608	0.829723	3236	0.12	-0.25324	0.235148	0.281512	2052	0.15	0.202865	0.20182	0.314811	2091	0.15	-0.10017	0.125085	0.423255	5927	0.41	0.123866	0.054548
DQB1_67_I	29687	0.28	-0.01179	0.02991	0.693325	7143	0.45	0.088942	0.049082	0.06997	325050	0.32	-0.01677	0.020543	0.414331	63001	0.33	-0.06709	0.053477	0.209638	90188	0.29	-0.0086	0.0161	0.5917	4265	0.31	0.102297	0.123315	0.406791	3236	0.32	-0.20771	0.163342	0.203496	2056	0.31	0.145338	0.158009	0.35767	2091	0.27	0.03546	0.100647	0.7246	6070	0.58	0.129506	0.057119
DQB1_66_D	29687	0.28	-0.01179	0.02991	0.693325	7143	0.45	0.088942	0.049082	0.06997	325050	0.32	-0.01677	0.020543	0.414331	63001	0.33	-0.06709	0.053477	0.209638	90188	0.29	-0.0086	0.0161	0.5917	4265	0.31	0.102297	0.123315	0.406791	3236	0.32	-0.20771	0.163342	0.203496	2056	0.31	0.145338	0.158009	0.35767	2091	0.27	0.03546	0.100647	0.7246	6070	0.58	0.129506	0.057119
DRB1_93_Ref	0					0					325050	0.97	0.025813	0.059563	0.664673	63001	0.95	-0.05443	0.121887	0.6552	82424	0.96	-0.0145	0.0402	0.7184	0					0					0					2091	0.97	0.178418	0.279255	0.522883	5927	0.96	0.251197	0.138086
DRB1_92_Ref	0					0					325050	0.97	0.025813	0.059563	0.664673	63001	0.95	-0.05443	0.121887	0.6552	82424	0.96	-0.0145	0.0402	0.7184	0					0					0					2091	0.97	0.178418	0.279255	0.522883	5927	0.96	0.251197	0.138086
DQA1_69_T	29687	0.06	-0.04885	0.051079	0.338912	7143	0.06	0.064854	0.106324	0.541885	325050	0.04	0.003936	0.046678	0.932818	63001	0.08	-0.12597	0.103566	0.223859	89860	0.07	0.0292	0.0297	0.326	4265	0.17	0.230978	0.157818	0.14331	3236	0.16	-0.12235	0.212468	0.564712	2059	0.28	-0.05043	0.16708	0.7628	2091	0.21	0.067919	0.110788	0.539843	6065	0.09	-0.06385	0.090647
DQA1_41_Ref	29687	0.9	0.007508	0.039379	0.848795	7143	0.99	-0.37576	0.300494	0.211127	325050	0.93	-0.01734	0.037658	0.645235	63001	0.89	-0.05241	0.08259	0.525685	89860	0.9	0.0216	0.0247	0.3821	4265	0.91	0.198055	0.19029	0.297967	3236	0.91	-0.04194	0.262123	0.872873	2052	0.92	-0.1892	0.25196	0.452708	2091	0.89	-0.10796	0.142172	0.447649	6065	0.8	-0.03094	0.066796
DRB1_74_Ref	29687	0.89	0.040413	0.038051	0.288205	7143	0.89	0.081213	0.076702	0.28969	325050	0.86	0.007287	0.027779	0.793179	63001	0.87	-0.0288	0.074225	0.698012	82424	0.87	-0.0134	0.0233	0.5657	4265	0.84	0.12888	0.15707	0.411918	3236	0.86	0.042425	0.21468	0.843342	2062	0.85	-0.30395	0.203111	0.134529	2091	0.89	-0.09374	0.143663	0.514066	5927	0.84	-0.09299	0.073943
DQB1_86_G	29687	0.09	-0.02933	0.041415	0.478782	7143	0.08	-0.04635	0.087253	0.595237	325050	0.07	0.004475	0.03629	0.901773	63001	0.08	-0.0726	0.092401	0.432046	90188	0.09	0.0157	0.0262	0.5497	4265	0.07	-0.00689	0.213692	0.974293	3236	0.1	-0.03257	0.251872	0.897115	2052	0.09	-0.6162	0.246777	0.012525	2091	0.11	0.139435	0.141016	0.322767	6070	0.17	-0.0589	0.11916
DRB1_73_Ref	29687	0.93	0.019283	0.048634	0.69174	7143	0.94	0.020342	0.100051	0.838886	325050	0.91	0.032022	0.033911	0.344956	63001	0.93	0.00884	0.093862	0.924944	82424	0.92	-0.0181	0.0296	0.5404	4265	0.96	0.161192	0.286414	0.573576	3236	0.94	-0.04686	0.318515	0.88303	2062	0.93	-0.72489	0.273912	0.008134	2091	0.95	0.022437	0.200861	0.911056	5927	1	12.5312	186.986
DQB1_45_Ref	29687	0.91	-0.02013	0.041801	0.630163	7143	0.96	-0.02256	0.119606	0.850419	325050	0.92	0.023363	0.034922	0.50362	63001	0.91	-0.12569	0.084968	0.13906	90188	0.91	0.0022	0.0255	0.9304	4265	0.89	0.074109	0.180458	0.681314	3236	0.92	0.226351	0.266757	0.396144	2054	0.9	0.469521	0.237374	0.047931	2091	0.9	0.111709	0.151302	0.46032	6070	0.99	0.123499	0.232384
DRB1_12_Ref	29687	0.82	0.018583	0.03162	0.556739	7143	0.83	0.00607	0.064801	0.925374	325050	0.87	-0.03043	0.027955	0.276407	63001	0.81	0.053323	0.065394	0.414826	82424	0.81	0.014	0.0197	0.4797	4265	0.77	0.114346	0.134678	0.395863	3236	0.79	-0.02104	0.182237	0.908069	2063	0.64	0.111338	0.151656	0.462858	2091	0.67	-0.07771	0.094989	0.413331	5927	0.86	-0.00711	0.079719
DQA1_5_Ref	0					0					325050	0.59	0.015301	0.019441	0.43144	63001	0.57	0.031786	0.050487	0.528993	89860	0.56	-0.0106	0.0149	0.4779	0					0					0					0					6065	0.62	-0.0107	0.055762
DRB1_87_Ref	0					0					325050	0.98	0.03027	0.061639	0.623315	63001	0.96	-0.0909	0.133434	0.495726	82424	0.97	-0.0461	0.045	0.3058	0					0					0					2091	0.97	0.282773	0.284359	0.320018	5927	0.98	0.359375	0.190528
DQB1_87_F	29687	0.34	-0.00088	0.025	0.972004	7143	0.34	-0.03987	0.051831	0.441799	325050	0.36	0.035071	0.019908	0.078078	63001	0.32	0.047863	0.053331	0.369427	90188	0.33	-0.0205	0.0157	0.1929	4265	0.24	-0.03337	0.131171	0.799175	3236	0.3	0.067506	0.162861	0.678508	2063	0.44	0.051488	0.14336	0.719484	2091	0.4	0.036487	0.09136	0.689619	6070	0.14	-0.20851	0.073523
DQA1_6_Ref	0					0					325050	0.96	0.010333	0.046653	0.824649	63001	0.93	-0.09254	0.102015	0.364319	89860	0.94	0.0129	0.0311	0.6785	0					0					0					0					6065	0.92	-0.11301	0.098128
DQB1_57_S	29687	0.04	0.061162	0.057805	0.290024	7143	0.03	0.354865	0.138355	0.010321	325050	0.02	-0.05649	0.076477	0.460132	63001	0.05	-0.09768	0.122795	0.426325	90188	0.06	-0.0284	0.0345	0.41	4265	0.03	0.375437	0.348432	0.281255	3236	0.03	0.247897	0.405244	0.540722	2047	0.08	-0.27288	0.276984	0.324531	2091	0.06	0.096906	0.189374	0.608848	6070	0.05	0.014514	0.115447
DQA1_9_Ref	0					0					325050	0.96	0.010333	0.046653	0.824649	63001	0.93	-0.09254	0.102015	0.364319	89549	0.94	0.0115	0.0311	0.7119	0					0					0					0					6065	0.92	-0.11301	0.098128
DQA1_10_Ref	0					0					325050	0.96	0.010333	0.046653	0.824649	63001	0.93	-0.09254	0.102015	0.364319	89549	0.94	0.0115	0.0311	0.7119	0					0					0					0					6065	0.92	-0.11301	0.098128
DQA1_8_Ref	0					0					325050	0.96	0.010333	0.046653	0.824649	63001	0.93	-0.09254	0.102015	0.364319	89549	0.94	0.0115	0.0311	0.7119	0					0					0					0					6065	0.92	-0.11301	0.098128
DQA1_7_Ref	0					0					325050	0.96	0.010333	0.046653	0.824649	63001	0.93	-0.09254	0.102015	0.364319	89549	0.94	0.0115	0.0311	0.7119	0					0					0					0					6065	0.92	-0.11301	0.098128
DRB1_13_S	29687	0.59	-0.02175	0.025027	0.384865	7143	0.59	-0.03344	0.049558	0.499793	325050	0.55	0.027451	0.019204	0.152733	63001	0.6	-0.04571	0.050699	0.367304	82424	0.62	-0.0059	0.0159	0.7127	4265	0.6	-0.08864	0.114952	0.440666	3236	0.6	0.040147	0.153455	0.793616	2063	0.72	0.020837	0.15898	0.895724	2091	0.71	0.106156	0.098668	0.281975	5927	0.32	0.041849	0.069347
DRB1_89_Ref	0					0					325050	0.98	0.030861	0.061638	0.616505	63001	0.96	-0.04674	0.130425	0.720075	82424	0.97	-0.0442	0.045	0.3255	0					0					0					2091	0.97	0.230218	0.281788	0.413934	5927	0.97	0.293995	0.168606
DRB1_88_Ref	0					0					325050	0.98	0.030861	0.061638	0.616505	63001	0.96	-0.04674	0.130425	0.720075	82424	0.97	-0.0442	0.045	0.3255	0					0					0					2091	0.97	0.230218	0.281788	0.413934	5927	0.97	0.293995	0.168606
DRB1_90_Ref	0					0					325050	0.98	0.030861	0.061638	0.616505	63001	0.96	-0.04674	0.130425	0.720075	82424	0.97	-0.0442	0.045	0.3255	0					0					0					2091	0.97	0.230218	0.281788	0.413934	5927	0.97	0.293995	0.168606
DRB1_10_Ref	29687	0.82	0.013299	0.031088	0.668804	7143	0.82	-0.02202	0.063769	0.729864	325050	0.86	-0.02742	0.027596	0.320502	63001	0.79	0.051511	0.063776	0.419221	82424	0.8	0.0086	0.0194	0.6577	4265	0.75	0.153338	0.130379	0.239557	3236	0.76	-0.12302	0.175129	0.482412	2063	0.62	0.102038	0.149162	0.493926	2091	0.64	-0.11128	0.09329	0.232931	5927	0.86	0.007171	0.079049
DRB1_50_Ref	0					0					41683	1				9816	1				0					0					0					0					0					5927	1	11.5066	138.774
DRB1_16_Q	0					0					0					0					0					0					0					0					0					5927	0.04	-0.05173	0.137969
DRB1_47_F	29687	0.74	0.007236	0.026897	0.7879	7143	0.73	-0.02908	0.054854	0.596074	325050	0.71	0.045029	0.021153	0.033303	63001	0.75	0.030939	0.056591	0.58465	82424	0.74	-0.0195	0.0175	0.2651	4265	0.61	-0.0994	0.118556	0.401782	3236	0.68	-0.2087	0.16177	0.19701	2063	0.77	-0.03614	0.170443	0.832063	2091	0.79	0.00923	0.109384	0.932753	5927	0.58	-0.15902	0.062612
DRB1_74_E	29687	0.09	0.043669	0.039858	0.273245	7143	0.1	-0.18443	0.080809	0.022472	325050	0.1	-0.02755	0.031848	0.386984	63001	0.12	-0.05646	0.081557	0.488801	82424	0.1	0.0114	0.0259	0.6617	4265	0.23	-0.00503	0.139218	0.971151	3236	0.15	0.163593	0.207667	0.430835	2058	0.05	-0.24402	0.307086	0.426822	2091	0.06	0.564114	0.188382	0.002749	5927	0.42	-0.00078	0.055915
DRB1_10_Y	29687	0.64	-0.0267	0.025424	0.293706	7143	0.65	-0.02168	0.051001	0.670791	325050	0.6	0.025892	0.019492	0.184235	63001	0.66	-0.07917	0.051908	0.127206	82424	0.68	-0.0048	0.0164	0.7724	4265	0.7	-0.03919	0.122307	0.748626	3236	0.7	0.0054	0.164182	0.973762	2063	0.76	0.041537	0.166791	0.803334	2091	0.76	0.174659	0.105439	0.097621	5927	0.58	-0.0013	0.05906
DRB1_12_T	29687	0.64	-0.0267	0.025424	0.293706	7143	0.65	-0.02168	0.051001	0.670791	325050	0.6	0.025892	0.019492	0.184235	63001	0.66	-0.07917	0.051908	0.127206	82424	0.68	-0.0048	0.0164	0.7724	4265	0.7	-0.03919	0.122307	0.748626	3236	0.7	0.0054	0.164182	0.973762	2063	0.76	0.041537	0.166791	0.803334	2091	0.76	0.174659	0.105439	0.097621	5927	0.58	-0.0013	0.05906
DRB1_11_S	29687	0.64	-0.0267	0.025424	0.293706	7143	0.65	-0.02168	0.051001	0.670791	325050	0.6	0.025892	0.019492	0.184235	63001	0.66	-0.07917	0.051908	0.127206	82424	0.68	-0.0048	0.0164	0.7724	4265	0.7	-0.03919	0.122307	0.748626	3236	0.7	0.0054	0.164182	0.973762	2063	0.76	0.041537	0.166791	0.803334	2091	0.76	0.174659	0.105439	0.097621	5927	0.58	-0.0013	0.05906
DQB1_7_Ref	0					0					325050	0.9	0.018891	0.031814	0.552581	63001	0.84	-0.04704	0.071483	0.510509	90188	0.87	-0.0023	0.0218	0.9148	0					0					0					0					6070	0.87	-0.02365	0.080194
DQB1_8_Ref	0					0					325050	0.9	0.018891	0.031814	0.552581	63001	0.84	-0.04704	0.071483	0.510509	90188	0.87	-0.0023	0.0218	0.9148	0					0					0					0					6070	0.87	-0.02365	0.080194
DQB1_6_Ref	0					0					325050	0.9	0.018891	0.031814	0.552581	63001	0.84	-0.04704	0.071483	0.510509	90188	0.87	-0.0023	0.0218	0.9148	0					0					0					0					6070	0.87	-0.02365	0.080194
DQB1_13_Ref	29687	0.89	-0.02605	0.037672	0.489182	7143	0.94	0.080175	0.103739	0.43961	325050	0.9	0.019802	0.032268	0.539514	63001	0.86	-0.09651	0.074159	0.193145	90188	0.88	-0.0034	0.023	0.8826	4265	0.87	0.142432	0.16692	0.393495	3236	0.9	0.211112	0.245389	0.389616	2055	0.88	0.378467	0.224491	0.091817	2091	0.89	0.07688	0.14455	0.594825	6070	0.89	0.004709	0.085181
DRB1_13_G	29687	0.08	-0.01281	0.041855	0.759567	7143	0.1	0.126864	0.08273	0.125162	325050	0.07	-0.02927	0.037307	0.432732	63001	0.09	-0.09826	0.090566	0.277919	82424	0.1	0.0139	0.0267	0.6026	4265	0.17	-0.07499	0.15632	0.631448	3236	0.16	-0.249	0.20892	0.233316	2052	0.07	0.350922	0.264718	0.184957	2091	0.1	0.203637	0.147986	0.168806	5927	0.32	-0.03491	0.056335
DRB1_16_Y	29687	0.08	-0.01281	0.041855	0.759567	7143	0.1	0.126864	0.08273	0.125162	325050	0.07	-0.02927	0.037307	0.432732	63001	0.09	-0.09826	0.090566	0.277919	82424	0.1	0.0139	0.0267	0.6026	4265	0.17	-0.07499	0.15632	0.631448	3236	0.16	-0.249	0.20892	0.233316	2052	0.07	0.350922	0.264718	0.184957	2091	0.1	0.203637	0.147986	0.168806	5927	0.32	-0.03491	0.056335
[truncated: 25 more columns]
